# Supplementary material for: Domestication and lowland adaptation of coastal preceramic maize from Paredones, Peru
Source: eLife. 2023 Apr 18;12:e83149. doi: 10.7554/eLife.83149 (PMC10112886; doi:10.7554/eLife.83149)
Supplement: Figure 4—figure supplement 2—source data 1. [file elife-83149-fig4-figsupp2-data1.xlsx]

## Sheet: Figure 4-figure supplement 2
parviglumis	mexicana	Test	Outgroup	ABBA sites	BABA sites	D-raw	Z-score	SD-D statistic
TIL01	TIL08	Par_N16	TDD39103	133247	170857	-0.123675	1451.59	8.52e-05
TIL01-JD	TIL08	Par_N16	TDD39103	101992	180839	-0.278778	3929.48	7.09e-05
TIL02	TIL08	Par_N16	TDD39103	222487	160359	0.162279	1835.61	8.84e-05
TIL03	TIL08	Par_N16	TDD39103	87665	191894	-0.372834	5058.11	7.37e-05
TIL04-TIP454	TIL08	Par_N16	TDD39103	125678	161370	-0.124342	1512.83	8.22e-05
TIL05	TIL08	Par_N16	TDD39103	91859	182832	-0.331183	4308.86	7.69e-05
TIL06-TIP260	TIL08	Par_N16	TDD39103	147854	153140	-0.0175618	9.54787	0.00183934
TIL06-TIP496	TIL08	Par_N16	TDD39103	121918	172468	-0.171713	95.412	0.0017997
TIL07	TIL08	Par_N16	TDD39103	94166	184894	-0.32512	4521.42	7.19e-05
TIL09	TIL08	Par_N16	TDD39103	81798	187318	-0.392099	6183.78	6.34e-05
TIL10	TIL08	Par_N16	TDD39103	95724	188456	-0.326314	4660.9	7e-05
TIL11	TIL08	Par_N16	TDD39103	197411	139036	0.173504	1954.53	8.88e-05
TIL12	TIL08	Par_N16	TDD39103	99219	183125	-0.297177	3621.78	8.21e-05
TIL14-TIP498	TIL08	Par_N16	TDD39103	92799	179733	-0.318986	4236.01	7.53e-05
TIL15	TIL08	Par_N16	TDD39103	157410	151509	0.0191021	187.575	0.000101837
TIL16	TIL08	Par_N16	TDD39103	133102	165267	-0.107803	1231.5	8.75e-05
TIL17	TIL08	Par_N16	TDD39103	142762	123847	0.0709466	844.692	8.4e-05
TIL01	TIL25-TIP489	Par_N16	TDD39103	105137	126953	-0.093998	1341.56	7.01e-05
TIL01-JD	TIL25-TIP489	Par_N16	TDD39103	242363	126278	0.3149	3826.84	8.23e-05
TIL02	TIL25-TIP489	Par_N16	TDD39103	92475	139390	-0.202338	2851.67	7.1e-05
TIL03	TIL25-TIP489	Par_N16	TDD39103	142673	122566	0.0758071	820.136	9.24e-05
TIL04-TIP454	TIL25-TIP489	Par_N16	TDD39103	94080	128592	-0.15499	2361.33	6.56e-05
TIL05	TIL25-TIP489	Par_N16	TDD39103	134239	113528	0.0835906	1124.76	7.43e-05
TIL06-TIP260	TIL25-TIP489	Par_N16	TDD39103	161981	111886	0.182917	2068.7	8.84e-05
TIL06-TIP496	TIL25-TIP489	Par_N16	TDD39103	135676	128502	0.0271559	361.194	7.52e-05
TIL07	TIL25-TIP489	Par_N16	TDD39103	99677	133382	-0.14462	2045.23	7.07e-05
TIL09	TIL25-TIP489	Par_N16	TDD39103	87751	136430	-0.217141	3413.06	6.36e-05
TIL10	TIL25-TIP489	Par_N16	TDD39103	99240	133910	-0.148703	2196.49	6.77e-05
TIL11	TIL25-TIP489	Par_N16	TDD39103	218459	106525	0.344429	4177.51	8.24e-05
TIL12	TIL25-TIP489	Par_N16	TDD39103	99852	126796	-0.11888	1696.85	7.01e-05
TIL14-TIP498	TIL25-TIP489	Par_N16	TDD39103	92608	123090	-0.141318	2304.14	6.13e-05
TIL15	TIL25-TIP489	Par_N16	TDD39103	171324	109889	0.218464	2386.19	9.16e-05
TIL16	TIL25-TIP489	Par_N16	TDD39103	153102	128942	0.0856604	948.201	9.03e-05
TIL17	TIL25-TIP489	Par_N16	TDD39103	103789	92362	0.0582561	1014.3	5.74e-05
TIL01	TIL08	PT2233	TDD39103	101835	83250	0.100413	1814.01	5.54e-05
TIL01-JD	TIL08	PT2233	TDD39103	107659	125344	-0.0759003	1381.59	5.49e-05
TIL02	TIL08	PT2233	TDD39103	103209	77019	0.145316	2824.61	5.14e-05
TIL03	TIL08	PT2233	TDD39103	99612	91180	0.0441947	917.523	4.82e-05
TIL04-TIP454	TIL08	PT2233	TDD39103	101040	74997	0.147941	3072.64	4.81e-05
TIL05	TIL08	PT2233	TDD39103	98502	89196	0.0495796	892.126	5.56e-05
TIL06-TIP260	TIL08	PT2233	TDD39103	100540	90102	0.0547518	946.849	5.78e-05
TIL06-TIP496	TIL08	PT2233	TDD39103	102478	93728	0.044596	919.524	4.85e-05
TIL07	TIL08	PT2233	TDD39103	102104	77367	0.137833	2885.82	4.78e-05
TIL09	TIL08	PT2233	TDD39103	100240	71693	0.166036	3672.99	4.52e-05
TIL10	TIL08	PT2233	TDD39103	102469	79138	0.12847	2694.86	4.77e-05
TIL11	TIL08	PT2233	TDD39103	100595	101537	-0.00466032	77.23	6.03e-05
TIL12	TIL08	PT2233	TDD39103	102727	81824	0.113264	2169.88	5.22e-05
TIL14-TIP498	TIL08	PT2233	TDD39103	99344	75080	0.139109	2631.96	5.29e-05
TIL15	TIL08	PT2233	TDD39103	99655	97276	0.0120804	220.101	5.49e-05
TIL16	TIL08	PT2233	TDD39103	100973	90526	0.0545538	1054.85	5.17e-05
TIL17	TIL08	PT2233	TDD39103	90264	90402	-0.00076384	13.8435	5.52e-05
TIL01	TIL25-TIP489	PT2233	TDD39103	86952	79967	0.0418466	795.802	5.26e-05
TIL01-JD	TIL25-TIP489	PT2233	TDD39103	99068	128000	-0.127416	2304.53	5.53e-05
TIL02	TIL25-TIP489	PT2233	TDD39103	90156	75374	0.089301	1677.87	5.32e-05
TIL03	TIL25-TIP489	PT2233	TDD39103	89313	91746	-0.0134376	267.618	5.02e-05
TIL04-TIP454	TIL25-TIP489	PT2233	TDD39103	87220	72240	0.093942	1888.08	4.98e-05
TIL05	TIL25-TIP489	PT2233	TDD39103	86256	87357	-0.00634169	120.028	5.28e-05
TIL06-TIP260	TIL25-TIP489	PT2233	TDD39103	88944	89022	-0.000438286	7.84158	5.59e-05
TIL06-TIP496	TIL25-TIP489	PT2233	TDD39103	91668	94731	-0.0164325	351.744	4.67e-05
TIL07	TIL25-TIP489	PT2233	TDD39103	89490	76325	0.0793957	1599.03	4.97e-05
TIL09	TIL25-TIP489	PT2233	TDD39103	88429	71168	0.108154	2264.2	4.78e-05
TIL10	TIL25-TIP489	PT2233	TDD39103	87469	75512	0.0733644	1566.82	4.68e-05
TIL01	TIL08	BKN022	TDD39103	113212	183809	-0.237683	132.604	0.00179243
TIL01-JD	TIL08	BKN022	TDD39103	230720	163092	0.171727	106.858	0.00160706
TIL02	TIL08	BKN022	TDD39103	100092	200673	-0.334417	193.123	0.00173163
TIL03	TIL08	BKN022	TDD39103	132536	171633	-0.128537	72.9532	0.00176191
TIL04-TIP454	TIL08	BKN022	TDD39103	105656	182060	-0.265553	148.053	0.00179364
TIL05	TIL08	BKN022	TDD39103	135235	161955	-0.0899088	50.2321	0.00178987
TIL06-TIP260	TIL08	BKN022	TDD39103	155700	158994	-0.0104673	5.61273	0.00186492
TIL06-TIP496	TIL08	BKN022	TDD39103	131518	177075	-0.147628	81.4601	0.00181227
TIL07	TIL08	BKN022	TDD39103	108540	186640	-0.264584	150.61	0.00175675
TIL09	TIL08	BKN022	TDD39103	97039	183820	-0.308984	172.696	0.00178918
TIL10	TIL08	BKN022	TDD39103	108545	189579	-0.271813	158.64	0.0017134
TIL11	TIL08	BKN022	TDD39103	201207	145750	0.159838	97.9788	0.00163136
TIL12	TIL08	BKN022	TDD39103	110503	191185	-0.267435	150.536	0.00177655
TIL14-TIP498	TIL08	BKN022	TDD39103	108232	172427	-0.22873	125.386	0.0018242
TIL15	TIL08	BKN022	TDD39103	165052	155301	0.0304383	17.765	0.00171338
TIL16	TIL08	BKN022	TDD39103	140143	172830	-0.10444	60.5317	0.00172538
TIL17	TIL08	BKN022	TDD39103	147975	136538	0.0401985	22.1112	0.00181801
TIL01	TIL25-TIP489	BKN022	TDD39103	114346	138462	-0.0953926	46.8281	0.00203708
TIL01-JD	TIL25-TIP489	BKN022	TDD39103	245287	134036	0.293288	184.477	0.00158984
TIL02	TIL25-TIP489	BKN022	TDD39103	102869	156206	-0.205875	110.863	0.00185702
TIL03	TIL25-TIP489	BKN022	TDD39103	143910	137632	0.0222986	11.9188	0.00187088
TIL04-TIP454	TIL25-TIP489	BKN022	TDD39103	107037	136893	-0.122396	59.8654	0.00204452
TIL05	TIL25-TIP489	BKN022	TDD39103	142463	123092	0.0729453	39.084	0.00186638
TIL06-TIP260	TIL25-TIP489	BKN022	TDD39103	166720	123977	0.147036	82.7462	0.00177696
TIL06-TIP496	TIL25-TIP489	BKN022	TDD39103	142316	142215	0.00035497	0.194832	0.00182193
TIL07	TIL25-TIP489	BKN022	TDD39103	111431	143960	-0.127369	65.0299	0.00195863
TIL09	TIL25-TIP489	BKN022	TDD39103	101182	141590	-0.166444	86.413	0.00192615
TIL10	TIL25-TIP489	BKN022	TDD39103	109529	143628	-0.134695	70.5411	0.00190946
TIL11	TIL25-TIP489	BKN022	TDD39103	218566	118343	0.297478	186.829	0.00159225
TIL12	TIL25-TIP489	BKN022	TDD39103	109350	143166	-0.133916	69.2031	0.00193512
TIL14-TIP498	TIL25-TIP489	BKN022	TDD39103	106853	126522	-0.0842807	1337.49	6.3e-05
TIL15	TIL25-TIP489	BKN022	TDD39103	174654	120483	0.183545	2140.45	8.58e-05
TIL16	TIL25-TIP489	BKN022	TDD39103	156348	143022	0.0445135	542.27	8.21e-05
