# Supplementary material for: Domestication and lowland adaptation of coastal preceramic maize from Paredones, Peru
Source: eLife. 2023 Apr 18;12:e83149. doi: 10.7554/eLife.83149 (PMC10112886; doi:10.7554/eLife.83149)
Supplement: Figure 4—figure supplement 3—source data 1. [file elife-83149-fig4-figsupp3-data1.xlsx]

## Sheet: Figure 4-figure supplement 3
parviglumis	mexicana	Test	Outgroup	ABBA sites	BABA sites	D-raw	Z-score	SD-D statistic
TIL01	TIL08	Par_N16	TDD39103	23899	30682	-0.124274	29.4708	0.00421685
TIL01-JD	TIL08	Par_N16	TDD39103	24663	31313	-0.118801	26.2116	0.00453237
TIL02	TIL08	Par_N16	TDD39103	18079	29173	-0.234784	50.5666	0.00464306
TIL03	TIL08	Par_N16	TDD39103	23000	34042	-0.193577	49.4609	0.00391373
TIL04-TIP454	TIL08	Par_N16	TDD39103	21569	30405	-0.170008	40.1431	0.00423505
TIL05	TIL08	Par_N16	TDD39103	23650	30518	-0.126791	28.652	0.00442519
TIL06-TIP260	TIL08	Par_N16	TDD39103	23933	26772	-0.0559905	12.3995	0.00451554
TIL06-TIP496	TIL08	Par_N16	TDD39103	23427	26455	-0.0607033	14.0094	0.00433303
TIL07	TIL08	Par_N16	TDD39103	22781	30140	-0.139056	29.4367	0.00472391
TIL09	TIL08	Par_N16	TDD39103	23646	32151	-0.152427	34.703	0.00439234
TIL10	TIL08	Par_N16	TDD39103	22283	31679	-0.174123	40.8501	0.00426247
TIL11	TIL08	Par_N16	TDD39103	23950	32652	-0.15374	37.4557	0.00410459
TIL12	TIL08	Par_N16	TDD39103	21798	25571	-0.0796513	17.8432	0.00446396
TIL14-TIP498	TIL08	Par_N16	TDD39103	23764	31861	-0.145564	36.1982	0.00402131
TIL15	TIL08	Par_N16	TDD39103	24928	26875	-0.0375847	8.83398	0.00425456
TIL16	TIL08	Par_N16	TDD39103	23929	26145	-0.0442545	10.0874	0.00438713
TIL17	TIL08	Par_N16	TDD39103	21301	31969	-0.200263	48.4081	0.00413697
TIL01	TIL25-TIP489	Par_N16	TDD39103	22070	31684	-0.178852	37.0685	0.0048249
TIL01-JD	TIL25-TIP489	Par_N16	TDD39103	22788	32319	-0.172954	39.1344	0.0044195
TIL02	TIL25-TIP489	Par_N16	TDD39103	17717	31739	-0.283525	70.5978	0.00401606
TIL03	TIL25-TIP489	Par_N16	TDD39103	22054	36008	-0.240329	61.5942	0.00390182
TIL04-TIP454	TIL25-TIP489	Par_N16	TDD39103	21390	33114	-0.215104	47.2302	0.00455436
TIL05	TIL25-TIP489	Par_N16	TDD39103	22242	32019	-0.180185	41.9849	0.00429165
TIL06-TIP260	TIL25-TIP489	Par_N16	TDD39103	22530	28152	-0.110927	24.1686	0.00458972
TIL06-TIP496	TIL25-TIP489	Par_N16	TDD39103	22126	27917	-0.115721	28.2432	0.00409729
TIL07	TIL25-TIP489	Par_N16	TDD39103	22702	32857	-0.182779	48.959	0.0037333
TIL09	TIL25-TIP489	Par_N16	TDD39103	22931	34142	-0.196433	52.5895	0.00373521
TIL10	TIL25-TIP489	Par_N16	TDD39103	22179	34499	-0.217368	48.1457	0.0045148
TIL11	TIL25-TIP489	Par_N16	TDD39103	22477	34099	-0.205423	46.7769	0.00439155
TIL12	TIL25-TIP489	Par_N16	TDD39103	20299	26815	-0.138303	32.6133	0.00424069
TIL14-TIP498	TIL25-TIP489	Par_N16	TDD39103	22477	33467	-0.196446	47.8136	0.00410859
TIL15	TIL25-TIP489	Par_N16	TDD39103	22965	27741	-0.09419	21.1531	0.00445279
TIL16	TIL25-TIP489	Par_N16	TDD39103	22049	26983	-0.100628	22.1901	0.00453482
TIL17	TIL25-TIP489	Par_N16	TDD39103	21044	34713	-0.245153	57.9981	0.00422691
TIL01	TIL08	PT2233	TDD39103	30154	33743	-0.0561685	12.3977	0.00453055
TIL01-JD	TIL08	PT2233	TDD39103	31004	34791	-0.0575576	14.2673	0.00403422
TIL02	TIL08	PT2233	TDD39103	24276	31119	-0.123531	30.191	0.00409165
TIL03	TIL08	PT2233	TDD39103	29429	37798	-0.124489	31.6638	0.00393158
TIL04-TIP454	TIL08	PT2233	TDD39103	27659	33454	-0.0948243	20.9121	0.00453443
TIL05	TIL08	PT2233	TDD39103	29717	33921	-0.0660612	15.5356	0.00425224
TIL06-TIP260	TIL08	PT2233	TDD39103	29740	30075	-0.0056006	1.35373	0.00413718
TIL06-TIP496	TIL08	PT2233	TDD39103	29135	29631	-0.00844026	2.29861	0.00367189
TIL07	TIL08	PT2233	TDD39103	29045	33369	-0.0692793	18.1541	0.00381619
TIL09	TIL08	PT2233	TDD39103	29943	35550	-0.0856122	19.5482	0.00437954
TIL10	TIL08	PT2233	TDD39103	28477	35262	-0.10645	25.3051	0.00420665
TIL11	TIL08	PT2233	TDD39103	30355	36033	-0.0855275	21.246	0.00402559
TIL12	TIL08	PT2233	TDD39103	27349	28128	-0.0140419	3.48531	0.00402886
TIL14-TIP498	TIL08	PT2233	TDD39103	30189	35250	-0.0773392	21.1888	0.00365
TIL15	TIL08	PT2233	TDD39103	30413	30650	-0.00388124	0.998666	0.00388642
TIL16	TIL08	PT2233	TDD39103	29699	29299	0.00677989	1.73805	0.00390087
TIL17	TIL08	PT2233	TDD39103	27538	34752	-0.115813	26.9797	0.00429261
TIL01	TIL25-TIP489	PT2233	TDD39103	30159	34256	-0.0636032	16.2892	0.00390463
TIL01-JD	TIL25-TIP489	PT2233	TDD39103	30866	35254	-0.0663642	17.6914	0.0037512
TIL02	TIL25-TIP489	PT2233	TDD39103	25818	33318	-0.126826	28.1771	0.00450104
TIL03	TIL25-TIP489	PT2233	TDD39103	30258	39349	-0.130605	30.8488	0.0042337
TIL04-TIP454	TIL25-TIP489	PT2233	TDD39103	29340	35753	-0.0985206	22.4136	0.00439557
TIL05	TIL25-TIP489	PT2233	TDD39103	30097	34865	-0.0733968	18.1127	0.00405224
TIL06-TIP260	TIL25-TIP489	PT2233	TDD39103	30285	31201	-0.0148977	3.47579	0.00428614
TIL06-TIP496	TIL25-TIP489	PT2233	TDD39103	29806	30837	-0.0170011	4.53181	0.00375152
TIL07	TIL25-TIP489	PT2233	TDD39103	30910	35670	-0.0714929	18.0263	0.00396603
TIL09	TIL25-TIP489	PT2233	TDD39103	30948	37151	-0.091088	21.7367	0.00419051
TIL10	TIL25-TIP489	PT2233	TDD39103	30110	37572	-0.110251	33.6491	0.00327649
TIL11	TIL25-TIP489	PT2233	TDD39103	30527	36861	-0.093993	27.6784	0.00339589
TIL12	TIL25-TIP489	PT2233	TDD39103	27785	29105	-0.0232027	5.22851	0.00443772
TIL14-TIP498	TIL25-TIP489	PT2233	TDD39103	30681	36351	-0.0845865	22.9569	0.00368458
TIL15	TIL25-TIP489	PT2233	TDD39103	30264	31035	-0.0125777	2.76319	0.00455187
TIL16	TIL25-TIP489	PT2233	TDD39103	29586	29715	-0.00217534	0.497759	0.00437028
TIL17	TIL25-TIP489	PT2233	TDD39103	29294	37296	-0.120168	29.9125	0.00401732
TIL01	TIL08	BKN022	TDD39103	31935	40468	-0.117854	29.3541	0.00401491
TIL01-JD	TIL08	BKN022	TDD39103	32703	41681	-0.120698	33.919	0.00355842
TIL02	TIL08	BKN022	TDD39103	26125	35842	-0.156809	36.0819	0.00434592
TIL03	TIL08	BKN022	TDD39103	30644	46664	-0.207223	59.8663	0.00346143
TIL04-TIP454	TIL08	BKN022	TDD39103	29362	39535	-0.147655	36.4849	0.00404703
TIL05	TIL08	BKN022	TDD39103	31263	40826	-0.132656	35.655	0.00372053
TIL06-TIP260	TIL08	BKN022	TDD39103	31507	35718	-0.0626404	20.1704	0.00310557
TIL06-TIP496	TIL08	BKN022	TDD39103	30840	35531	-0.0706785	16.4692	0.00429156
TIL07	TIL08	BKN022	TDD39103	30506	40907	-0.145646	40.897	0.00356128
TIL09	TIL08	BKN022	TDD39103	32023	42586	-0.141578	38.3837	0.00368849
TIL10	TIL08	BKN022	TDD39103	30368	40744	-0.145911	40.3279	0.00361811
TIL11	TIL08	BKN022	TDD39103	32367	42820	-0.139027	37.5064	0.00370674
TIL12	TIL08	BKN022	TDD39103	28874	33070	-0.0677386	17.1954	0.00393935
TIL14-TIP498	TIL08	BKN022	TDD39103	31682	42851	-0.149853	42.2289	0.00354859
TIL15	TIL08	BKN022	TDD39103	32230	35564	-0.0491784	13.5574	0.00362742
TIL16	TIL08	BKN022	TDD39103	31647	33781	-0.032616	7.88872	0.00413451
TIL17	TIL08	BKN022	TDD39103	29262	41352	-0.171212	40.2991	0.00424854
TIL01	TIL25-TIP489	BKN022	TDD39103	31539	41245	-0.133354	35.7675	0.00372835
TIL01-JD	TIL25-TIP489	BKN022	TDD39103	32273	42386	-0.135456	33.1047	0.00409174
TIL02	TIL25-TIP489	BKN022	TDD39103	27264	38059	-0.165256	41.7333	0.0039598
TIL03	TIL25-TIP489	BKN022	TDD39103	31263	48379	-0.214912	66.9278	0.0032111
TIL04-TIP454	TIL25-TIP489	BKN022	TDD39103	30817	42039	-0.15403	40.3066	0.00382145
TIL05	TIL25-TIP489	BKN022	TDD39103	31628	42220	-0.14343	37.452	0.0038297
TIL06-TIP260	TIL25-TIP489	BKN022	TDD39103	31713	36888	-0.0754362	20.0841	0.00375601
TIL06-TIP496	TIL25-TIP489	BKN022	TDD39103	31164	36827	-0.0832904	23.2449	0.00358317
TIL07	TIL25-TIP489	BKN022	TDD39103	32074	43314	-0.149095	37.4367	0.0039826
TIL09	TIL25-TIP489	BKN022	TDD39103	32332	43913	-0.151892	40.5007	0.00375035
TIL10	TIL25-TIP489	BKN022	TDD39103	31608	43124	-0.154097	41.9258	0.00367548
TIL11	TIL25-TIP489	BKN022	TDD39103	32229	43806	-0.152259	48.9011	0.00311361
TIL12	TIL25-TIP489	BKN022	TDD39103	29015	34357	-0.0842959	23.1275	0.00364483
TIL14-TIP498	TIL25-TIP489	BKN022	TDD39103	31888	44042	-0.160069	42.8232	0.00373789
TIL15	TIL25-TIP489	BKN022	TDD39103	31876	36171	-0.0631181	16.5113	0.00382272
TIL16	TIL25-TIP489	BKN022	TDD39103	31421	34445	-0.0459114	13.2837	0.00345623
TIL17	TIL25-TIP489	BKN022	TDD39103	30352	43606	-0.17921	48.0556	0.00372922
