# Supplementary material for: Domestication and lowland adaptation of coastal preceramic maize from Paredones, Peru
Source: eLife. 2023 Apr 18;12:e83149. doi: 10.7554/eLife.83149 (PMC10112886; doi:10.7554/eLife.83149)
Supplement: Figure 4—figure supplement 5—source data 1. [file elife-83149-fig4-figsupp5-data1.xlsx]

## Sheet: Figure 4-figure supplement 5
parviglumis	mexicana	Test	Outgroup	ABBA sites	BABA sites	D-raw	Z-score	SD-D statistic
TIL01	TIL08	Par_N16	TDD39103	38397	23899	0.232728	65.3395	0.00356182
TIL01-JD	TIL08	Par_N16	TDD39103	40114	24663	0.238526	64.2474	0.00371262
TIL02	TIL08	Par_N16	TDD39103	33170	18079	0.294464	66.7586	0.00441088
TIL03	TIL08	Par_N16	TDD39103	37932	23000	0.24506	65.0331	0.00376824
TIL04-TIP454	TIL08	Par_N16	TDD39103	43253	21569	0.334516	109.887	0.00304419
TIL05	TIL08	Par_N16	TDD39103	45152	23650	0.31252	83.4583	0.00374462
TIL06-TIP260	TIL08	Par_N16	TDD39103	45373	23933	0.309353	81.1171	0.00381365
TIL06-TIP496	TIL08	Par_N16	TDD39103	44753	23427	0.31279	87.8192	0.00356175
TIL07	TIL08	Par_N16	TDD39103	40220	22781	0.276805	77.0692	0.00359164
TIL09	TIL08	Par_N16	TDD39103	39971	23646	0.256614	68.0517	0.00377086
TIL10	TIL08	Par_N16	TDD39103	45003	22283	0.337663	85.8379	0.00393373
TIL11	TIL08	Par_N16	TDD39103	39158	23950	0.240984	59.4388	0.00405432
TIL12	TIL08	Par_N16	TDD39103	47117	21798	0.367395	101.918	0.0036048
TIL14-TIP498	TIL08	Par_N16	TDD39103	39250	23764	0.245755	57.0517	0.00430758
TIL15	TIL08	Par_N16	TDD39103	48746	24928	0.323289	104.54	0.0030925
TIL16	TIL08	Par_N16	TDD39103	43274	23929	0.287859	76.2958	0.00377293
TIL17	TIL08	Par_N16	TDD39103	40533	21301	0.311026	79.7229	0.00390134
TIL01	TIL25-TIP489	Par_N16	TDD39103	45853	22070	0.350147	86.584	0.00404401
TIL01-JD	TIL25-TIP489	Par_N16	TDD39103	48427	22788	0.360023	99.9815	0.00360089
TIL02	TIL25-TIP489	Par_N16	TDD39103	34962	17717	0.32736	79.9953	0.00409224
TIL03	TIL25-TIP489	Par_N16	TDD39103	42769	22054	0.319563	88.0654	0.00362869
TIL04-TIP454	TIL25-TIP489	Par_N16	TDD39103	45883	21390	0.364084	105.674	0.00344536
TIL05	TIL25-TIP489	Par_N16	TDD39103	50889	22242	0.391722	106.629	0.00367369
TIL06-TIP260	TIL25-TIP489	Par_N16	TDD39103	52050	22530	0.395817	121.072	0.00326926
TIL06-TIP496	TIL25-TIP489	Par_N16	TDD39103	51031	22126	0.395109	111.165	0.00355425
TIL07	TIL25-TIP489	Par_N16	TDD39103	40777	22702	0.28474	68.6401	0.0041483
TIL09	TIL25-TIP489	Par_N16	TDD39103	44562	22931	0.320493	104.969	0.00305321
TIL10	TIL25-TIP489	Par_N16	TDD39103	46595	22179	0.355018	92.9393	0.00381989
TIL11	TIL25-TIP489	Par_N16	TDD39103	49837	22477	0.37835	117.58	0.00321781
TIL12	TIL25-TIP489	Par_N16	TDD39103	51345	20299	0.433337	129.059	0.00335766
TIL14-TIP498	TIL25-TIP489	Par_N16	TDD39103	48880	22477	0.370013	105.694	0.00350079
TIL15	TIL25-TIP489	Par_N16	TDD39103	58088	22965	0.433334	139.325	0.00311023
TIL16	TIL25-TIP489	Par_N16	TDD39103	51493	22049	0.40037	133.569	0.00299748
TIL17	TIL25-TIP489	Par_N16	TDD39103	40591	21044	0.317141	78.9258	0.00401822
TIL01	TIL08	PT2233	TDD39103	37169	30154	0.104199	28.2949	0.00368261
TIL01-JD	TIL08	PT2233	TDD39103	38783	31004	0.111468	36.1344	0.00308481
TIL02	TIL08	PT2233	TDD39103	32414	24276	0.143553	34.744	0.00413172
TIL03	TIL08	PT2233	TDD39103	36766	29429	0.110839	26.4743	0.00418667
TIL04-TIP454	TIL08	PT2233	TDD39103	42033	27659	0.20625	57.982	0.00355714
TIL05	TIL08	PT2233	TDD39103	43765	29717	0.191176	52.294	0.00365579
TIL06-TIP260	TIL08	PT2233	TDD39103	43877	29740	0.192034	57.4386	0.0033433
TIL06-TIP496	TIL08	PT2233	TDD39103	43248	29135	0.194977	55.8291	0.00349239
TIL07	TIL08	PT2233	TDD39103	38960	29045	0.145798	39.5458	0.00368682
TIL09	TIL08	PT2233	TDD39103	38672	29943	0.127217	35.2803	0.0036059
TIL10	TIL08	PT2233	TDD39103	43697	28477	0.210879	57.5339	0.00366531
TIL11	TIL08	PT2233	TDD39103	38029	30355	0.112219	29.9608	0.00374554
TIL12	TIL08	PT2233	TDD39103	45493	27349	0.249087	68.1569	0.00365461
TIL14-TIP498	TIL08	PT2233	TDD39103	38177	30189	0.116842	30.4116	0.00384201
TIL15	TIL08	PT2233	TDD39103	46763	30413	0.211853	58.8599	0.00359928
TIL16	TIL08	PT2233	TDD39103	41724	29699	0.168363	42.4842	0.00396296
TIL17	TIL08	PT2233	TDD39103	39411	27538	0.177344	43.7772	0.00405105
TIL01	TIL25-TIP489	PT2233	TDD39103	44197	30159	0.188794	52.9978	0.00356231
TIL01-JD	TIL25-TIP489	PT2233	TDD39103	46619	30866	0.203304	50.7704	0.00400438
TIL02	TIL25-TIP489	PT2233	TDD39103	33730	25818	0.132868	32.9105	0.00403724
TIL03	TIL25-TIP489	PT2233	TDD39103	41092	30258	0.151843	39.9682	0.00379909
TIL04-TIP454	TIL25-TIP489	PT2233	TDD39103	44187	29340	0.201926	55.8725	0.00361404
TIL05	TIL25-TIP489	PT2233	TDD39103	49013	30097	0.23911	66.2672	0.00360827
TIL06-TIP260	TIL25-TIP489	PT2233	TDD39103	50233	30285	0.247746	78.2882	0.00316454
TIL06-TIP496	TIL25-TIP489	PT2233	TDD39103	49226	29806	0.245723	68.4503	0.00358981
TIL07	TIL25-TIP489	PT2233	TDD39103	39045	30910	0.116289	28.5552	0.00407243
TIL09	TIL25-TIP489	PT2233	TDD39103	42740	30948	0.160026	43.7652	0.00365646
TIL10	TIL25-TIP489	PT2233	TDD39103	44668	30110	0.194683	49.0242	0.00397116
TIL11	TIL25-TIP489	PT2233	TDD39103	48126	30527	0.223755	58.4558	0.00382776
TIL12	TIL25-TIP489	PT2233	TDD39103	49410	27785	0.280135	74.3713	0.00376671
TIL14-TIP498	TIL25-TIP489	PT2233	TDD39103	47331	30681	0.213429	52.7984	0.00404234
TIL15	TIL25-TIP489	PT2233	TDD39103	55663	30264	0.295588	93.5504	0.00315967
TIL16	TIL25-TIP489	PT2233	TDD39103	49496	29586	0.251764	82.5753	0.0030489
TIL17	TIL25-TIP489	PT2233	TDD39103	39068	29294	0.142974	39.4705	0.0036223
TIL01	TIL08	BKN022	TDD39103	34404	31935	0.0372179	9.33268	0.00398791
TIL01-JD	TIL08	BKN022	TDD39103	35843	32703	0.0458086	10.4132	0.00439907
TIL02	TIL08	BKN022	TDD39103	30179	26125	0.072002	17.2447	0.0041753
TIL03	TIL08	BKN022	TDD39103	33339	30644	0.0421206	10.7636	0.00391326
TIL04-TIP454	TIL08	BKN022	TDD39103	39277	29362	0.144451	36.6793	0.00393823
TIL05	TIL08	BKN022	TDD39103	40596	31263	0.129879	28.3533	0.00458075
TIL06-TIP260	TIL08	BKN022	TDD39103	41164	31507	0.132887	42.0231	0.00316223
TIL06-TIP496	TIL08	BKN022	TDD39103	40443	30840	0.134717	36.6138	0.00367939
TIL07	TIL08	BKN022	TDD39103	35992	30506	0.0824987	23.8886	0.00345348
TIL09	TIL08	BKN022	TDD39103	36138	32023	0.0603718	15.0076	0.00402276
TIL10	TIL08	BKN022	TDD39103	40954	30368	0.148425	41.2339	0.0035996
TIL11	TIL08	BKN022	TDD39103	35384	32367	0.0445307	12.1769	0.00365697
TIL12	TIL08	BKN022	TDD39103	42542	28874	0.191386	48.5723	0.00394022
TIL14-TIP498	TIL08	BKN022	TDD39103	35026	31682	0.0501289	15.3607	0.00326345
TIL15	TIL08	BKN022	TDD39103	43927	32230	0.153591	39.2013	0.003918
TIL16	TIL08	BKN022	TDD39103	39286	31647	0.107693	28.9848	0.00371551
TIL17	TIL08	BKN022	TDD39103	36614	29262	0.111604	29.1579	0.00382756
TIL01	TIL25-TIP489	BKN022	TDD39103	41412	31539	0.135337	36.0697	0.00375211
TIL01-JD	TIL25-TIP489	BKN022	TDD39103	43658	32273	0.149939	43.155	0.00347443
TIL02	TIL25-TIP489	BKN022	TDD39103	31474	27264	0.0716742	20.763	0.00345202
TIL03	TIL25-TIP489	BKN022	TDD39103	37705	31263	0.0934056	30.194	0.00309351
TIL04-TIP454	TIL25-TIP489	BKN022	TDD39103	41428	30817	0.146875	40.1443	0.00365868
TIL05	TIL25-TIP489	BKN022	TDD39103	46132	31628	0.186523	50.7238	0.00367722
TIL06-TIP260	TIL25-TIP489	BKN022	TDD39103	47337	31713	0.197647	59.8925	0.00330003
TIL06-TIP496	TIL25-TIP489	BKN022	TDD39103	46268	31164	0.195061	56.4929	0.00345285
TIL07	TIL25-TIP489	BKN022	TDD39103	36025	32074	0.0580185	15.373	0.00377405
TIL09	TIL25-TIP489	BKN022	TDD39103	39661	32332	0.101802	24.3893	0.00417403
TIL10	TIL25-TIP489	BKN022	TDD39103	41709	31608	0.137772	38.1342	0.00361281
TIL11	TIL25-TIP489	BKN022	TDD39103	45468	32229	0.170393	46.0842	0.00369742
TIL12	TIL25-TIP489	BKN022	TDD39103	46583	29015	0.232387	68.2482	0.00340503
TIL14-TIP498	TIL25-TIP489	BKN022	TDD39103	44115	31888	0.160875	45.0164	0.0035737
TIL15	TIL25-TIP489	BKN022	TDD39103	52836	31876	0.247427	74.0927	0.00333942
TIL16	TIL25-TIP489	BKN022	TDD39103	47164	31421	0.200331	56.8183	0.00352582
TIL17	TIL25-TIP489	BKN022	TDD39103	36040	30352	0.085673	21.7777	0.00393397
