# Supplementary material for: Domestication and lowland adaptation of coastal preceramic maize from Paredones, Peru
Source: eLife. 2023 Apr 18;12:e83149. doi: 10.7554/eLife.83149 (PMC10112886; doi:10.7554/eLife.83149)
Supplement: Figure 4—source data 1. [file elife-83149-fig4-data1.xlsx]

## Sheet: Data file for Figure 4
parviglumis	mexicana	Test	Outgroup	ABBA sites	BABA sites	D-raw	Z-score	SD-D statistic
TIL01	TIL08	Par_N16	TDD39103	46436	25347	0.293788	77.9468	0.00376909
TIL01-JD	TIL08	Par_N16	TDD39103	48633	26111	0.301322	85.543	0.00352246
TIL02	TIL08	Par_N16	TDD39103	40056	19045	0.35551	90.3433	0.0039351
TIL03	TIL08	Par_N16	TDD39103	45948	24486	0.304711	92.1734	0.00330584
TIL04-TIP454	TIL08	Par_N16	TDD39103	52597	22866	0.393981	101.093	0.00389724
TIL05	TIL08	Par_N16	TDD39103	55415	25085	0.37677	117.853	0.00319694
TIL06-TIP260	TIL08	Par_N16	TDD39103	55062	25174	0.372501	105.047	0.00354605
TIL06-TIP496	TIL08	Par_N16	TDD39103	54351	24770	0.37387	112.659	0.0033186
TIL07	TIL08	Par_N16	TDD39103	48294	23966	0.336673	109.454	0.00307595
TIL09	TIL08	Par_N16	TDD39103	49094	24969	0.325736	93.8704	0.00347006
TIL10	TIL08	Par_N16	TDD39103	55442	23596	0.40292	127.457	0.00316123
TIL11	TIL08	Par_N16	TDD39103	47251	25461	0.299675	101.162	0.00296233
TIL12	TIL08	Par_N16	TDD39103	56984	22925	0.426222	131.893	0.00323158
TIL14-TIP498	TIL08	Par_N16	TDD39103	47398	25207	0.30564	90.6943	0.00337
TIL15	TIL08	Par_N16	TDD39103	59440	26198	0.388169	122.903	0.00315832
TIL16	TIL08	Par_N16	TDD39103	51842	25179	0.346178	97.187	0.00356198
TIL17	TIL08	Par_N16	TDD39103	48957	22501	0.370231	109.433	0.00338316
TIL01	TIL25-TIP489	Par_N16	TDD39103	55981	23853	0.402435	113.942	0.00353194
TIL01-JD	TIL25-TIP489	Par_N16	TDD39103	59555	24571	0.415852	134.079	0.00310154
TIL02	TIL25-TIP489	Par_N16	TDD39103	42937	19117	0.383859	119.529	0.00321143
TIL03	TIL25-TIP489	Par_N16	TDD39103	53953	23846	0.386984	125.247	0.00308976
TIL04-TIP454	TIL25-TIP489	Par_N16	TDD39103	57281	22989	0.427208	126.216	0.00338474
TIL05	TIL25-TIP489	Par_N16	TDD39103	63309	23990	0.450395	140.408	0.00320775
TIL06-TIP260	TIL25-TIP489	Par_N16	TDD39103	63523	24110	0.449751	162.983	0.00275949
TIL06-TIP496	TIL25-TIP489	Par_N16	TDD39103	62625	23838	0.448597	127.825	0.00350946
TIL07	TIL25-TIP489	Par_N16	TDD39103	49692	24345	0.342356	98.3487	0.00348104
TIL09	TIL25-TIP489	Par_N16	TDD39103	55244	24538	0.384874	129.203	0.00297883
TIL10	TIL25-TIP489	Par_N16	TDD39103	59278	23906	0.425226	149.714	0.00284024
TIL11	TIL25-TIP489	Par_N16	TDD39103	61998	24281	0.437152	151.268	0.00288991
TIL12	TIL25-TIP489	Par_N16	TDD39103	61461	21730	0.477588	163.653	0.0029183
TIL14-TIP498	TIL25-TIP489	Par_N16	TDD39103	61538	24261	0.434469	143.479	0.0030281
TIL15	TIL25-TIP489	Par_N16	TDD39103	71366	24530	0.488404	179.994	0.00271345
TIL16	TIL25-TIP489	Par_N16	TDD39103	62059	23666	0.447862	152.543	0.00293598
TIL17	TIL25-TIP489	Par_N16	TDD39103	49765	22668	0.374097	113.568	0.00329403
TIL01	TIL08	PT2233	TDD39103	7896	14543	-0.296225	45.9048	0.00645303
TIL01-JD	TIL08	PT2233	TDD39103	8056	14743	-0.293302	44.7875	0.00654875
TIL02	TIL08	PT2233	TDD39103	7428	13367	-0.285598	44.8068	0.00637397
TIL03	TIL08	PT2233	TDD39103	7906	14856	-0.305333	48.5732	0.00628605
TIL04-TIP454	TIL08	PT2233	TDD39103	8308	13793	-0.248179	39.696	0.00625199
TIL05	TIL08	PT2233	TDD39103	8362	14301	-0.262057	45.9842	0.00569885
TIL06-TIP260	TIL08	PT2233	TDD39103	8239	13808	-0.252597	40.1555	0.00629046
TIL06-TIP496	TIL08	PT2233	TDD39103	8129	13671	-0.25422	42.1049	0.00603778
TIL07	TIL08	PT2233	TDD39103	7978	14296	-0.283649	43.3227	0.00654736
TIL09	TIL08	PT2233	TDD39103	8108	14542	-0.284062	43.8843	0.00647296
TIL10	TIL08	PT2233	TDD39103	8412	14086	-0.2522	40.2214	0.0062703
TIL11	TIL08	PT2233	TDD39103	8074	14624	-0.288572	50.4061	0.00572494
TIL12	TIL08	PT2233	TDD39103	8116	13298	-0.241991	32.9633	0.00734124
TIL14-TIP498	TIL08	PT2233	TDD39103	8187	14644	-0.282817	42.1146	0.00671542
TIL15	TIL08	PT2233	TDD39103	8403	13621	-0.236923	34.7843	0.00681123
TIL16	TIL08	PT2233	TDD39103	7970	13779	-0.267093	42.1489	0.00633688
TIL17	TIL08	PT2233	TDD39103	8111	13972	-0.265408	42.1693	0.00629386
TIL01	TIL25-TIP489	PT2233	TDD39103	7880	16455	-0.352373	55.4182	0.00635844
TIL01-JD	TIL25-TIP489	PT2233	TDD39103	8157	16619	-0.34154	58.9081	0.00579785
TIL02	TIL25-TIP489	PT2233	TDD39103	7335	15414	-0.355137	63.0922	0.00562885
TIL03	TIL25-TIP489	PT2233	TDD39103	7896	16630	-0.356112	57.6887	0.006173
TIL04-TIP454	TIL25-TIP489	PT2233	TDD39103	8119	15987	-0.326392	53.8836	0.00605735
TIL05	TIL25-TIP489	PT2233	TDD39103	8325	16203	-0.321184	54.1213	0.00593452
TIL06-TIP260	TIL25-TIP489	PT2233	TDD39103	8142	16009	-0.325742	52.9227	0.00615505
TIL06-TIP496	TIL25-TIP489	PT2233	TDD39103	8042	15889	-0.327901	59.0894	0.00554924
TIL07	TIL25-TIP489	PT2233	TDD39103	7789	16566	-0.360378	66.7866	0.00539596
TIL09	TIL25-TIP489	PT2233	TDD39103	8163	16443	-0.336503	52.6475	0.00639163
TIL10	TIL25-TIP489	PT2233	TDD39103	8250	16227	-0.325898	52.396	0.0062199
TIL11	TIL25-TIP489	PT2233	TDD39103	8093	16457	-0.340693	63.1593	0.00539418
TIL12	TIL25-TIP489	PT2233	TDD39103	8145	15222	-0.302863	41.7615	0.00725221
TIL14-TIP498	TIL25-TIP489	PT2233	TDD39103	8136	16565	-0.341241	59.5378	0.0057315
TIL15	TIL25-TIP489	PT2233	TDD39103	8543	15617	-0.292798	45.5413	0.00642928
TIL16	TIL25-TIP489	PT2233	TDD39103	8101	15589	-0.316083	48.2189	0.00655516
TIL17	TIL25-TIP489	PT2233	TDD39103	7938	16221	-0.342854	56.5837	0.00605923
TIL01	TIL08	BKN022	TDD39103	41629	37987	0.0457446	12.653	0.00361531
TIL01-JD	TIL08	BKN022	TDD39103	43514	38843	0.0567165	15.2981	0.00370743
TIL02	TIL08	BKN022	TDD39103	35853	31036	0.0720148	17.5366	0.00410655
TIL03	TIL08	BKN022	TDD39103	40187	36493	0.0481742	13.3807	0.00360028
TIL04-TIP454	TIL08	BKN022	TDD39103	47384	34718	0.154272	45.8306	0.00336612
TIL05	TIL08	BKN022	TDD39103	49721	37040	0.14616	38.0885	0.00383738
TIL06-TIP260	TIL08	BKN022	TDD39103	49880	37042	0.147696	38.1492	0.00387153
TIL06-TIP496	TIL08	BKN022	TDD39103	48975	36374	0.147641	44.047	0.0033519
TIL07	TIL08	BKN022	TDD39103	42939	35896	0.0893385	21.5437	0.00414684
TIL09	TIL08	BKN022	TDD39103	44352	38052	0.0764526	23.065	0.00331466
TIL10	TIL08	BKN022	TDD39103	50577	36290	0.16447	51.9008	0.00316892
TIL11	TIL08	BKN022	TDD39103	42461	38432	0.0498065	13.0411	0.00381919
TIL12	TIL08	BKN022	TDD39103	51179	34016	0.201456	68.8847	0.00292453
TIL14-TIP498	TIL08	BKN022	TDD39103	41964	37485	0.0563758	15.1802	0.00371377
TIL15	TIL08	BKN022	TDD39103	53848	38098	0.171296	49.2625	0.00347721
TIL16	TIL08	BKN022	TDD39103	46773	37101	0.115316	30.1757	0.00382148
TIL17	TIL08	BKN022	TDD39103	43742	34519	0.117849	34.7867	0.00338777
TIL01	TIL25-TIP489	BKN022	TDD39103	50367	38756	0.130281	35.2987	0.00369081
TIL01-JD	TIL25-TIP489	BKN022	TDD39103	53531	39569	0.149968	45.8133	0.00327346
TIL02	TIL25-TIP489	BKN022	TDD39103	38043	33221	0.0676639	17.7862	0.0038043
TIL03	TIL25-TIP489	BKN022	TDD39103	47352	38276	0.105993	32.3813	0.00327329
TIL04-TIP454	TIL25-TIP489	BKN022	TDD39103	51326	37335	0.157803	48.3497	0.00326379
TIL05	TIL25-TIP489	BKN022	TDD39103	57157	38618	0.193568	62.4895	0.00309761
TIL06-TIP260	TIL25-TIP489	BKN022	TDD39103	57557	38492	0.198492	62.8572	0.00315783
TIL06-TIP496	TIL25-TIP489	BKN022	TDD39103	56451	37887	0.196782	56.8117	0.00346376
TIL07	TIL25-TIP489	BKN022	TDD39103	43405	38800	0.0560185	15.3616	0.00364665
TIL09	TIL25-TIP489	BKN022	TDD39103	49102	39646	0.106549	27.8622	0.00382414
TIL10	TIL25-TIP489	BKN022	TDD39103	53024	38667	0.15658	47.1636	0.00331994
TIL11	TIL25-TIP489	BKN022	TDD39103	56416	39612	0.174991	57.7504	0.00303012
TIL12	TIL25-TIP489	BKN022	TDD39103	55280	35269	0.220996	71.5508	0.00308866
TIL14-TIP498	TIL25-TIP489	BKN022	TDD39103	55308	38963	0.173383	61.3781	0.00282484
TIL15	TIL25-TIP489	BKN022	TDD39103	65205	39132	0.249892	90.4434	0.00276297
TIL16	TIL25-TIP489	BKN022	TDD39103	56465	38222	0.192666	60.9029	0.0031635
TIL17	TIL25-TIP489	BKN022	TDD39103	43630	36891	0.0836925	24.8825	0.00336351
