# Supplementary material for: Domestication and lowland adaptation of coastal preceramic maize from Paredones, Peru
Source: eLife. 2023 Apr 18;12:e83149. doi: 10.7554/eLife.83149 (PMC10112886; doi:10.7554/eLife.83149)
Supplement: Figure 5—figure supplement 1—source data 1. [file elife-83149-fig5-figsupp1-data1.xlsx]

## Sheet: Figure 5-figure supplement 1
Figure 5-figure supplement 1. Distribution of intersected SNPs between Par_N16 and landraces from Mesoamerica (MA) and South America (SA). Intersections involved genome-wide non-adaptive SNPs (Non-adaptive; blue distributions) and SNPs with significant FST implicated as adaptive (Adaptive; red lines) between Par_N16 and the reference dataset (Takuno et al., 2015).
MA		SA
type	Coverage	type	Coverage
Adaptive_MA	32	Adaptive_SA	20
Non-adaptive	18	Non-adaptive	26
Non-adaptive	30	Non-adaptive	27
Non-adaptive	28	Non-adaptive	21
Non-adaptive	25	Non-adaptive	21
Non-adaptive	25	Non-adaptive	21
Non-adaptive	26	Non-adaptive	19
Non-adaptive	26	Non-adaptive	12
Non-adaptive	22	Non-adaptive	33
Non-adaptive	25	Non-adaptive	19
Non-adaptive	32	Non-adaptive	11
Non-adaptive	22	Non-adaptive	31
Non-adaptive	26	Non-adaptive	27
Non-adaptive	32	Non-adaptive	27
Non-adaptive	30	Non-adaptive	23
Non-adaptive	26	Non-adaptive	28
Non-adaptive	25	Non-adaptive	25
Non-adaptive	30	Non-adaptive	21
Non-adaptive	29	Non-adaptive	12
Non-adaptive	26	Non-adaptive	17
Non-adaptive	27	Non-adaptive	25
Non-adaptive	30	Non-adaptive	15
Non-adaptive	29	Non-adaptive	26
Non-adaptive	29	Non-adaptive	21
Non-adaptive	24	Non-adaptive	34
Non-adaptive	30	Non-adaptive	24
Non-adaptive	19	Non-adaptive	22
Non-adaptive	28	Non-adaptive	27
Non-adaptive	24	Non-adaptive	29
Non-adaptive	28	Non-adaptive	25
Non-adaptive	23	Non-adaptive	32
Non-adaptive	30	Non-adaptive	16
Non-adaptive	34	Non-adaptive	24
Non-adaptive	28	Non-adaptive	25
Non-adaptive	37	Non-adaptive	17
Non-adaptive	24	Non-adaptive	20
Non-adaptive	29	Non-adaptive	22
Non-adaptive	25	Non-adaptive	18
Non-adaptive	32	Non-adaptive	27
Non-adaptive	35	Non-adaptive	19
Non-adaptive	37	Non-adaptive	25
Non-adaptive	20	Non-adaptive	21
Non-adaptive	27	Non-adaptive	20
Non-adaptive	30	Non-adaptive	24
Non-adaptive	36	Non-adaptive	20
Non-adaptive	29	Non-adaptive	29
Non-adaptive	36	Non-adaptive	22
Non-adaptive	23	Non-adaptive	22
Non-adaptive	35	Non-adaptive	24
Non-adaptive	31	Non-adaptive	25
Non-adaptive	29	Non-adaptive	19
Non-adaptive	38	Non-adaptive	20
Non-adaptive	32	Non-adaptive	16
Non-adaptive	36	Non-adaptive	31
Non-adaptive	30	Non-adaptive	16
Non-adaptive	35	Non-adaptive	29
Non-adaptive	31	Non-adaptive	27
Non-adaptive	25	Non-adaptive	23
Non-adaptive	27	Non-adaptive	24
Non-adaptive	23	Non-adaptive	23
Non-adaptive	33	Non-adaptive	13
Non-adaptive	28	Non-adaptive	21
Non-adaptive	26	Non-adaptive	19
Non-adaptive	29	Non-adaptive	27
Non-adaptive	28	Non-adaptive	26
Non-adaptive	24	Non-adaptive	25
Non-adaptive	30	Non-adaptive	22
Non-adaptive	30	Non-adaptive	22
Non-adaptive	16	Non-adaptive	16
Non-adaptive	36	Non-adaptive	25
Non-adaptive	19	Non-adaptive	19
Non-adaptive	29	Non-adaptive	16
Non-adaptive	31	Non-adaptive	23
Non-adaptive	24	Non-adaptive	20
Non-adaptive	27	Non-adaptive	20
Non-adaptive	30	Non-adaptive	27
Non-adaptive	41	Non-adaptive	22
Non-adaptive	18	Non-adaptive	31
Non-adaptive	27	Non-adaptive	23
Non-adaptive	28	Non-adaptive	24
Non-adaptive	34	Non-adaptive	20
Non-adaptive	20	Non-adaptive	23
Non-adaptive	29	Non-adaptive	11
Non-adaptive	28	Non-adaptive	19
Non-adaptive	20	Non-adaptive	25
Non-adaptive	25	Non-adaptive	23
Non-adaptive	30	Non-adaptive	23
Non-adaptive	29	Non-adaptive	25
Non-adaptive	21	Non-adaptive	24
Non-adaptive	27	Non-adaptive	17
Non-adaptive	31	Non-adaptive	26
Non-adaptive	26	Non-adaptive	25
Non-adaptive	32	Non-adaptive	23
Non-adaptive	23	Non-adaptive	23
Non-adaptive	20	Non-adaptive	20
Non-adaptive	27	Non-adaptive	18
Non-adaptive	25	Non-adaptive	27
Non-adaptive	30	Non-adaptive	20
Non-adaptive	30	Non-adaptive	17
Non-adaptive	31	Non-adaptive	21
Non-adaptive	21	Non-adaptive	25
Non-adaptive	33	Non-adaptive	21
Non-adaptive	26	Non-adaptive	22
Non-adaptive	35	Non-adaptive	20
Non-adaptive	26	Non-adaptive	18
Non-adaptive	37	Non-adaptive	15
Non-adaptive	33	Non-adaptive	18
Non-adaptive	28	Non-adaptive	16
Non-adaptive	34	Non-adaptive	21
Non-adaptive	34	Non-adaptive	26
Non-adaptive	26	Non-adaptive	21
Non-adaptive	31	Non-adaptive	23
Non-adaptive	25	Non-adaptive	19
Non-adaptive	29	Non-adaptive	27
Non-adaptive	31	Non-adaptive	21
Non-adaptive	34	Non-adaptive	25
Non-adaptive	28	Non-adaptive	22
Non-adaptive	28	Non-adaptive	20
Non-adaptive	22	Non-adaptive	25
Non-adaptive	33	Non-adaptive	21
Non-adaptive	12	Non-adaptive	19
Non-adaptive	30	Non-adaptive	26
Non-adaptive	28	Non-adaptive	20
Non-adaptive	39	Non-adaptive	24
Non-adaptive	32	Non-adaptive	17
Non-adaptive	33	Non-adaptive	18
Non-adaptive	27	Non-adaptive	27
Non-adaptive	19	Non-adaptive	26
Non-adaptive	30	Non-adaptive	31
Non-adaptive	31	Non-adaptive	31
Non-adaptive	35	Non-adaptive	17
Non-adaptive	28	Non-adaptive	25
Non-adaptive	32	Non-adaptive	27
Non-adaptive	30	Non-adaptive	26
Non-adaptive	31	Non-adaptive	24
Non-adaptive	26	Non-adaptive	22
Non-adaptive	30	Non-adaptive	21
Non-adaptive	35	Non-adaptive	16
Non-adaptive	31	Non-adaptive	19
Non-adaptive	35	Non-adaptive	22
Non-adaptive	33	Non-adaptive	25
Non-adaptive	33	Non-adaptive	29
Non-adaptive	39	Non-adaptive	24
Non-adaptive	29	Non-adaptive	22
Non-adaptive	32	Non-adaptive	29
Non-adaptive	36	Non-adaptive	29
Non-adaptive	19	Non-adaptive	19
Non-adaptive	29	Non-adaptive	19
Non-adaptive	19	Non-adaptive	26
Non-adaptive	17	Non-adaptive	19
Non-adaptive	23	Non-adaptive	21
Non-adaptive	36	Non-adaptive	24
Non-adaptive	27	Non-adaptive	23
Non-adaptive	23	Non-adaptive	26
Non-adaptive	31	Non-adaptive	23
Non-adaptive	31	Non-adaptive	24
Non-adaptive	29	Non-adaptive	11
Non-adaptive	30	Non-adaptive	19
Non-adaptive	31	Non-adaptive	25
Non-adaptive	32	Non-adaptive	27
Non-adaptive	23	Non-adaptive	27
Non-adaptive	26	Non-adaptive	26
Non-adaptive	24	Non-adaptive	25
Non-adaptive	22	Non-adaptive	21
Non-adaptive	38	Non-adaptive	24
Non-adaptive	37	Non-adaptive	26
Non-adaptive	32	Non-adaptive	20
Non-adaptive	29	Non-adaptive	27
Non-adaptive	24	Non-adaptive	12
Non-adaptive	19	Non-adaptive	30
Non-adaptive	24	Non-adaptive	17
Non-adaptive	27	Non-adaptive	27
Non-adaptive	29	Non-adaptive	26
Non-adaptive	27	Non-adaptive	16
Non-adaptive	28	Non-adaptive	22
Non-adaptive	26	Non-adaptive	17
Non-adaptive	29	Non-adaptive	17
Non-adaptive	23	Non-adaptive	18
Non-adaptive	32	Non-adaptive	20
Non-adaptive	31	Non-adaptive	24
Non-adaptive	29	Non-adaptive	22
Non-adaptive	24	Non-adaptive	15
Non-adaptive	27	Non-adaptive	21
Non-adaptive	29	Non-adaptive	22
Non-adaptive	36	Non-adaptive	18
Non-adaptive	27	Non-adaptive	17
Non-adaptive	30	Non-adaptive	16
Non-adaptive	23	Non-adaptive	28
Non-adaptive	30	Non-adaptive	27
Non-adaptive	25	Non-adaptive	23
Non-adaptive	30	Non-adaptive	31
Non-adaptive	24	Non-adaptive	18
Non-adaptive	44	Non-adaptive	26
Non-adaptive	20	Non-adaptive	26
Non-adaptive	29	Non-adaptive	25
Non-adaptive	19	Non-adaptive	19
Non-adaptive	27	Non-adaptive	22
Non-adaptive	33	Non-adaptive	28
Non-adaptive	27	Non-adaptive	22
Non-adaptive	24	Non-adaptive	26
Non-adaptive	29	Non-adaptive	22
Non-adaptive	23	Non-adaptive	22
Non-adaptive	35	Non-adaptive	25
Non-adaptive	37	Non-adaptive	25
Non-adaptive	24	Non-adaptive	28
Non-adaptive	28	Non-adaptive	23
Non-adaptive	19	Non-adaptive	28
Non-adaptive	28	Non-adaptive	20
Non-adaptive	31	Non-adaptive	20
Non-adaptive	25	Non-adaptive	27
Non-adaptive	27	Non-adaptive	20
Non-adaptive	27	Non-adaptive	30
Non-adaptive	26	Non-adaptive	25
Non-adaptive	31	Non-adaptive	18
Non-adaptive	26	Non-adaptive	20
Non-adaptive	20	Non-adaptive	19
Non-adaptive	24	Non-adaptive	22
Non-adaptive	33	Non-adaptive	19
Non-adaptive	21	Non-adaptive	20
Non-adaptive	28	Non-adaptive	14
Non-adaptive	32	Non-adaptive	19
Non-adaptive	25	Non-adaptive	28
Non-adaptive	38	Non-adaptive	19
Non-adaptive	26	Non-adaptive	19
Non-adaptive	27	Non-adaptive	32
Non-adaptive	26	Non-adaptive	16
Non-adaptive	33	Non-adaptive	32
Non-adaptive	28	Non-adaptive	33
Non-adaptive	26	Non-adaptive	25
Non-adaptive	32	Non-adaptive	18
Non-adaptive	27	Non-adaptive	22
Non-adaptive	20	Non-adaptive	23
Non-adaptive	26	Non-adaptive	18
Non-adaptive	29	Non-adaptive	22
Non-adaptive	32	Non-adaptive	23
Non-adaptive	33	Non-adaptive	16
Non-adaptive	34	Non-adaptive	19
Non-adaptive	32	Non-adaptive	15
Non-adaptive	30	Non-adaptive	22
Non-adaptive	36	Non-adaptive	22
Non-adaptive	26	Non-adaptive	19
Non-adaptive	28	Non-adaptive	30
Non-adaptive	26	Non-adaptive	16
Non-adaptive	27	Non-adaptive	21
Non-adaptive	22	Non-adaptive	21
Non-adaptive	27	Non-adaptive	27
Non-adaptive	34	Non-adaptive	25
Non-adaptive	26	Non-adaptive	22
Non-adaptive	30	Non-adaptive	29
Non-adaptive	23	Non-adaptive	21
Non-adaptive	29	Non-adaptive	27
Non-adaptive	27	Non-adaptive	27
Non-adaptive	25	Non-adaptive	20
Non-adaptive	27	Non-adaptive	27
Non-adaptive	30	Non-adaptive	21
Non-adaptive	24	Non-adaptive	25
Non-adaptive	27	Non-adaptive	13
Non-adaptive	29	Non-adaptive	28
Non-adaptive	24	Non-adaptive	23
Non-adaptive	33	Non-adaptive	22
Non-adaptive	22	Non-adaptive	19
Non-adaptive	26	Non-adaptive	31
Non-adaptive	28	Non-adaptive	16
Non-adaptive	24	Non-adaptive	20
Non-adaptive	28	Non-adaptive	19
Non-adaptive	23	Non-adaptive	19
Non-adaptive	27	Non-adaptive	25
Non-adaptive	33	Non-adaptive	17
Non-adaptive	32	Non-adaptive	23
Non-adaptive	33	Non-adaptive	13
Non-adaptive	24	Non-adaptive	20
Non-adaptive	20	Non-adaptive	29
Non-adaptive	30	Non-adaptive	18
Non-adaptive	26	Non-adaptive	19
Non-adaptive	24	Non-adaptive	29
Non-adaptive	34	Non-adaptive	18
Non-adaptive	31	Non-adaptive	34
Non-adaptive	30	Non-adaptive	28
Non-adaptive	32	Non-adaptive	22
Non-adaptive	32	Non-adaptive	33
Non-adaptive	27	Non-adaptive	27
Non-adaptive	32	Non-adaptive	14
Non-adaptive	26	Non-adaptive	23
Non-adaptive	18	Non-adaptive	22
Non-adaptive	25	Non-adaptive	18
Non-adaptive	35	Non-adaptive	28
Non-adaptive	34	Non-adaptive	15
Non-adaptive	28	Non-adaptive	24
Non-adaptive	36	Non-adaptive	22
Non-adaptive	28	Non-adaptive	26
Non-adaptive	22	Non-adaptive	19
Non-adaptive	38	Non-adaptive	29
Non-adaptive	38	Non-adaptive	24
Non-adaptive	22	Non-adaptive	26
Non-adaptive	32	Non-adaptive	29
Non-adaptive	37	Non-adaptive	22
Non-adaptive	27	Non-adaptive	23
Non-adaptive	34	Non-adaptive	18
Non-adaptive	32	Non-adaptive	24
Non-adaptive	29	Non-adaptive	21
Non-adaptive	33	Non-adaptive	22
Non-adaptive	31	Non-adaptive	25
Non-adaptive	34	Non-adaptive	24
Non-adaptive	29	Non-adaptive	27
Non-adaptive	27	Non-adaptive	22
Non-adaptive	35	Non-adaptive	26
Non-adaptive	22	Non-adaptive	26
Non-adaptive	24	Non-adaptive	22
Non-adaptive	29	Non-adaptive	25
Non-adaptive	23	Non-adaptive	18
Non-adaptive	23	Non-adaptive	25
Non-adaptive	28	Non-adaptive	25
Non-adaptive	18	Non-adaptive	25
Non-adaptive	37	Non-adaptive	26
Non-adaptive	28	Non-adaptive	21
Non-adaptive	31	Non-adaptive	32
Non-adaptive	21	Non-adaptive	32
Non-adaptive	31	Non-adaptive	20
Non-adaptive	32	Non-adaptive	22
Non-adaptive	26	Non-adaptive	26
Non-adaptive	24	Non-adaptive	30
Non-adaptive	25	Non-adaptive	20
Non-adaptive	29	Non-adaptive	14
Non-adaptive	21	Non-adaptive	19
Non-adaptive	28	Non-adaptive	27
Non-adaptive	29	Non-adaptive	22
Non-adaptive	23	Non-adaptive	25
Non-adaptive	29	Non-adaptive	24
Non-adaptive	33	Non-adaptive	19
Non-adaptive	27	Non-adaptive	23
Non-adaptive	26	Non-adaptive	28
Non-adaptive	27	Non-adaptive	21
Non-adaptive	33	Non-adaptive	20
Non-adaptive	35	Non-adaptive	27
Non-adaptive	29	Non-adaptive	28
Non-adaptive	24	Non-adaptive	25
Non-adaptive	33	Non-adaptive	17
Non-adaptive	27	Non-adaptive	22
Non-adaptive	24	Non-adaptive	21
Non-adaptive	25	Non-adaptive	23
Non-adaptive	34	Non-adaptive	22
Non-adaptive	25	Non-adaptive	16
Non-adaptive	22	Non-adaptive	29
Non-adaptive	35	Non-adaptive	28
Non-adaptive	38	Non-adaptive	25
Non-adaptive	25	Non-adaptive	28
Non-adaptive	22	Non-adaptive	21
Non-adaptive	34	Non-adaptive	23
Non-adaptive	36	Non-adaptive	23
Non-adaptive	32	Non-adaptive	19
Non-adaptive	29	Non-adaptive	16
Non-adaptive	25	Non-adaptive	19
Non-adaptive	33	Non-adaptive	18
Non-adaptive	20	Non-adaptive	28
Non-adaptive	26	Non-adaptive	17
Non-adaptive	25	Non-adaptive	20
Non-adaptive	25	Non-adaptive	32
Non-adaptive	23	Non-adaptive	24
Non-adaptive	24	Non-adaptive	18
Non-adaptive	27	Non-adaptive	21
Non-adaptive	34	Non-adaptive	19
Non-adaptive	24	Non-adaptive	27
Non-adaptive	33	Non-adaptive	29
Non-adaptive	18	Non-adaptive	20
Non-adaptive	28	Non-adaptive	18
Non-adaptive	23	Non-adaptive	13
Non-adaptive	26	Non-adaptive	16
Non-adaptive	37	Non-adaptive	25
Non-adaptive	26	Non-adaptive	27
Non-adaptive	20	Non-adaptive	22
Non-adaptive	35	Non-adaptive	17
Non-adaptive	28	Non-adaptive	26
Non-adaptive	24	Non-adaptive	22
Non-adaptive	34	Non-adaptive	26
Non-adaptive	30	Non-adaptive	26
Non-adaptive	35	Non-adaptive	29
Non-adaptive	26	Non-adaptive	22
Non-adaptive	24	Non-adaptive	33
Non-adaptive	19	Non-adaptive	22
Non-adaptive	28	Non-adaptive	17
Non-adaptive	27	Non-adaptive	31
Non-adaptive	26	Non-adaptive	27
Non-adaptive	28	Non-adaptive	28
Non-adaptive	26	Non-adaptive	16
Non-adaptive	25	Non-adaptive	22
Non-adaptive	30	Non-adaptive	26
Non-adaptive	25	Non-adaptive	19
Non-adaptive	26	Non-adaptive	31
Non-adaptive	28	Non-adaptive	29
Non-adaptive	22	Non-adaptive	17
Non-adaptive	29	Non-adaptive	25
Non-adaptive	30	Non-adaptive	17
Non-adaptive	30	Non-adaptive	24
Non-adaptive	22	Non-adaptive	22
Non-adaptive	24	Non-adaptive	21
Non-adaptive	33	Non-adaptive	22
Non-adaptive	28	Non-adaptive	22
Non-adaptive	19	Non-adaptive	26
Non-adaptive	26	Non-adaptive	28
Non-adaptive	32	Non-adaptive	26
Non-adaptive	30	Non-adaptive	22
Non-adaptive	45	Non-adaptive	30
Non-adaptive	30	Non-adaptive	22
Non-adaptive	32	Non-adaptive	26
Non-adaptive	33	Non-adaptive	25
Non-adaptive	26	Non-adaptive	17
Non-adaptive	23	Non-adaptive	16
Non-adaptive	35	Non-adaptive	22
Non-adaptive	36	Non-adaptive	23
Non-adaptive	24	Non-adaptive	25
Non-adaptive	28	Non-adaptive	27
Non-adaptive	23	Non-adaptive	19
Non-adaptive	34	Non-adaptive	28
Non-adaptive	35	Non-adaptive	26
Non-adaptive	28	Non-adaptive	15
Non-adaptive	27	Non-adaptive	24
Non-adaptive	31	Non-adaptive	18
Non-adaptive	30	Non-adaptive	21
Non-adaptive	24	Non-adaptive	23
Non-adaptive	23	Non-adaptive	18
Non-adaptive	24	Non-adaptive	19
Non-adaptive	25	Non-adaptive	23
Non-adaptive	30	Non-adaptive	24
Non-adaptive	36	Non-adaptive	25
Non-adaptive	32	Non-adaptive	24
Non-adaptive	29	Non-adaptive	14
Non-adaptive	23	Non-adaptive	15
Non-adaptive	29	Non-adaptive	28
Non-adaptive	29	Non-adaptive	24
Non-adaptive	33	Non-adaptive	18
Non-adaptive	32	Non-adaptive	27
Non-adaptive	29	Non-adaptive	29
Non-adaptive	25	Non-adaptive	22
Non-adaptive	18	Non-adaptive	22
Non-adaptive	33	Non-adaptive	24
Non-adaptive	26	Non-adaptive	32
Non-adaptive	18	Non-adaptive	16
Non-adaptive	23	Non-adaptive	26
Non-adaptive	32	Non-adaptive	25
Non-adaptive	22	Non-adaptive	20
Non-adaptive	31	Non-adaptive	24
Non-adaptive	38	Non-adaptive	16
Non-adaptive	32	Non-adaptive	17
Non-adaptive	32	Non-adaptive	26
Non-adaptive	31	Non-adaptive	30
Non-adaptive	27	Non-adaptive	26
Non-adaptive	31	Non-adaptive	18
Non-adaptive	29	Non-adaptive	20
Non-adaptive	38	Non-adaptive	27
Non-adaptive	33	Non-adaptive	16
Non-adaptive	31	Non-adaptive	18
Non-adaptive	24	Non-adaptive	23
Non-adaptive	32	Non-adaptive	20
Non-adaptive	32	Non-adaptive	19
Non-adaptive	32	Non-adaptive	25
Non-adaptive	27	Non-adaptive	22
Non-adaptive	26	Non-adaptive	20
Non-adaptive	28	Non-adaptive	19
Non-adaptive	28	Non-adaptive	26
Non-adaptive	32	Non-adaptive	25
Non-adaptive	25	Non-adaptive	30
Non-adaptive	28	Non-adaptive	31
Non-adaptive	33	Non-adaptive	15
Non-adaptive	27	Non-adaptive	27
Non-adaptive	29	Non-adaptive	22
Non-adaptive	27	Non-adaptive	17
Non-adaptive	36	Non-adaptive	19
Non-adaptive	30	Non-adaptive	23
Non-adaptive	35	Non-adaptive	21
Non-adaptive	26	Non-adaptive	21
Non-adaptive	35	Non-adaptive	25
Non-adaptive	30	Non-adaptive	21
Non-adaptive	35	Non-adaptive	25
Non-adaptive	26	Non-adaptive	25
Non-adaptive	36	Non-adaptive	25
Non-adaptive	32	Non-adaptive	15
Non-adaptive	32	Non-adaptive	19
Non-adaptive	39	Non-adaptive	24
Non-adaptive	27	Non-adaptive	22
Non-adaptive	42	Non-adaptive	22
Non-adaptive	38	Non-adaptive	26
Non-adaptive	29	Non-adaptive	23
Non-adaptive	27	Non-adaptive	14
Non-adaptive	21	Non-adaptive	27
Non-adaptive	39	Non-adaptive	15
Non-adaptive	31	Non-adaptive	19
Non-adaptive	29	Non-adaptive	23
Non-adaptive	24	Non-adaptive	25
Non-adaptive	22	Non-adaptive	29
Non-adaptive	33	Non-adaptive	19
Non-adaptive	29	Non-adaptive	18
Non-adaptive	24	Non-adaptive	26
Non-adaptive	25	Non-adaptive	17
Non-adaptive	32	Non-adaptive	29
Non-adaptive	29	Non-adaptive	21
Non-adaptive	25	Non-adaptive	25
Non-adaptive	26	Non-adaptive	17
Non-adaptive	32	Non-adaptive	22
Non-adaptive	29	Non-adaptive	16
Non-adaptive	23	Non-adaptive	23
Non-adaptive	30	Non-adaptive	17
Non-adaptive	22	Non-adaptive	22
Non-adaptive	34	Non-adaptive	19
Non-adaptive	30	Non-adaptive	24
Non-adaptive	28	Non-adaptive	25
Non-adaptive	26	Non-adaptive	35
Non-adaptive	24	Non-adaptive	25
Non-adaptive	35	Non-adaptive	21
Non-adaptive	27	Non-adaptive	23
Non-adaptive	29	Non-adaptive	21
Non-adaptive	23	Non-adaptive	20
Non-adaptive	27	Non-adaptive	25
Non-adaptive	25	Non-adaptive	24
Non-adaptive	30	Non-adaptive	27
Non-adaptive	26	Non-adaptive	20
Non-adaptive	25	Non-adaptive	20
Non-adaptive	22	Non-adaptive	20
Non-adaptive	24	Non-adaptive	20
Non-adaptive	30	Non-adaptive	20
Non-adaptive	42	Non-adaptive	25
Non-adaptive	23	Non-adaptive	26
Non-adaptive	28	Non-adaptive	26
Non-adaptive	22	Non-adaptive	26
Non-adaptive	26	Non-adaptive	22
Non-adaptive	28	Non-adaptive	15
Non-adaptive	29	Non-adaptive	25
Non-adaptive	24	Non-adaptive	23
Non-adaptive	24	Non-adaptive	23
Non-adaptive	26	Non-adaptive	21
Non-adaptive	28	Non-adaptive	21
Non-adaptive	30	Non-adaptive	18
Non-adaptive	26	Non-adaptive	24
Non-adaptive	22	Non-adaptive	26
Non-adaptive	33	Non-adaptive	23
Non-adaptive	26	Non-adaptive	25
Non-adaptive	20	Non-adaptive	19
Non-adaptive	23	Non-adaptive	23
Non-adaptive	19	Non-adaptive	27
Non-adaptive	34	Non-adaptive	20
Non-adaptive	26	Non-adaptive	16
Non-adaptive	24	Non-adaptive	24
Non-adaptive	29	Non-adaptive	20
Non-adaptive	28	Non-adaptive	22
Non-adaptive	36	Non-adaptive	24
Non-adaptive	33	Non-adaptive	27
Non-adaptive	38	Non-adaptive	23
Non-adaptive	32	Non-adaptive	20
Non-adaptive	28	Non-adaptive	26
Non-adaptive	30	Non-adaptive	25
Non-adaptive	25	Non-adaptive	20
Non-adaptive	29	Non-adaptive	26
Non-adaptive	24	Non-adaptive	20
Non-adaptive	27	Non-adaptive	20
Non-adaptive	33	Non-adaptive	21
Non-adaptive	28	Non-adaptive	16
Non-adaptive	24	Non-adaptive	24
Non-adaptive	26	Non-adaptive	27
Non-adaptive	35	Non-adaptive	25
Non-adaptive	22	Non-adaptive	32
Non-adaptive	28	Non-adaptive	23
Non-adaptive	31	Non-adaptive	22
Non-adaptive	17	Non-adaptive	24
Non-adaptive	26	Non-adaptive	20
Non-adaptive	36	Non-adaptive	21
Non-adaptive	26	Non-adaptive	15
Non-adaptive	29	Non-adaptive	20
Non-adaptive	28	Non-adaptive	17
Non-adaptive	29	Non-adaptive	27
Non-adaptive	35	Non-adaptive	19
Non-adaptive	24	Non-adaptive	26
Non-adaptive	31	Non-adaptive	30
Non-adaptive	28	Non-adaptive	25
Non-adaptive	28	Non-adaptive	21
Non-adaptive	25	Non-adaptive	23
Non-adaptive	37	Non-adaptive	27
Non-adaptive	29	Non-adaptive	18
Non-adaptive	25	Non-adaptive	29
Non-adaptive	32	Non-adaptive	25
Non-adaptive	31	Non-adaptive	22
Non-adaptive	30	Non-adaptive	13
Non-adaptive	20	Non-adaptive	18
Non-adaptive	25	Non-adaptive	23
Non-adaptive	23	Non-adaptive	13
Non-adaptive	31	Non-adaptive	16
Non-adaptive	35	Non-adaptive	27
Non-adaptive	31	Non-adaptive	23
Non-adaptive	28	Non-adaptive	23
Non-adaptive	30	Non-adaptive	23
Non-adaptive	24	Non-adaptive	23
Non-adaptive	24	Non-adaptive	18
Non-adaptive	27	Non-adaptive	21
Non-adaptive	19	Non-adaptive	26
Non-adaptive	30	Non-adaptive	26
Non-adaptive	25	Non-adaptive	20
Non-adaptive	26	Non-adaptive	26
Non-adaptive	26	Non-adaptive	19
Non-adaptive	29	Non-adaptive	29
Non-adaptive	24	Non-adaptive	23
Non-adaptive	34	Non-adaptive	21
Non-adaptive	36	Non-adaptive	24
Non-adaptive	35	Non-adaptive	20
Non-adaptive	20	Non-adaptive	16
Non-adaptive	25	Non-adaptive	27
Non-adaptive	23	Non-adaptive	27
Non-adaptive	28	Non-adaptive	18
Non-adaptive	26	Non-adaptive	20
Non-adaptive	29	Non-adaptive	30
Non-adaptive	26	Non-adaptive	17
Non-adaptive	18	Non-adaptive	14
Non-adaptive	20	Non-adaptive	22
Non-adaptive	20	Non-adaptive	18
Non-adaptive	31	Non-adaptive	16
Non-adaptive	30	Non-adaptive	22
Non-adaptive	28	Non-adaptive	22
Non-adaptive	25	Non-adaptive	18
Non-adaptive	27	Non-adaptive	20
Non-adaptive	28	Non-adaptive	32
Non-adaptive	30	Non-adaptive	20
Non-adaptive	22	Non-adaptive	25
Non-adaptive	20	Non-adaptive	22
Non-adaptive	31	Non-adaptive	18
Non-adaptive	32	Non-adaptive	25
Non-adaptive	28	Non-adaptive	16
Non-adaptive	31	Non-adaptive	27
Non-adaptive	25	Non-adaptive	22
Non-adaptive	28	Non-adaptive	25
Non-adaptive	35	Non-adaptive	25
Non-adaptive	29	Non-adaptive	31
Non-adaptive	27	Non-adaptive	16
Non-adaptive	30	Non-adaptive	23
Non-adaptive	27	Non-adaptive	18
Non-adaptive	33	Non-adaptive	26
Non-adaptive	32	Non-adaptive	35
Non-adaptive	25	Non-adaptive	23
Non-adaptive	22	Non-adaptive	29
Non-adaptive	21	Non-adaptive	12
Non-adaptive	31	Non-adaptive	20
Non-adaptive	31	Non-adaptive	24
Non-adaptive	29	Non-adaptive	19
Non-adaptive	27	Non-adaptive	24
Non-adaptive	32	Non-adaptive	21
Non-adaptive	30	Non-adaptive	21
Non-adaptive	21	Non-adaptive	26
Non-adaptive	33	Non-adaptive	17
Non-adaptive	20	Non-adaptive	23
Non-adaptive	23	Non-adaptive	23
Non-adaptive	24	Non-adaptive	28
Non-adaptive	30	Non-adaptive	22
Non-adaptive	20	Non-adaptive	28
Non-adaptive	26	Non-adaptive	22
Non-adaptive	31	Non-adaptive	30
Non-adaptive	27	Non-adaptive	20
Non-adaptive	25	Non-adaptive	29
Non-adaptive	35	Non-adaptive	20
Non-adaptive	21	Non-adaptive	13
Non-adaptive	34	Non-adaptive	20
Non-adaptive	29	Non-adaptive	24
Non-adaptive	32	Non-adaptive	21
Non-adaptive	32	Non-adaptive	23
Non-adaptive	28	Non-adaptive	26
Non-adaptive	27	Non-adaptive	20
Non-adaptive	24	Non-adaptive	16
Non-adaptive	29	Non-adaptive	25
Non-adaptive	20	Non-adaptive	23
Non-adaptive	21	Non-adaptive	18
Non-adaptive	31	Non-adaptive	23
Non-adaptive	26	Non-adaptive	22
Non-adaptive	14	Non-adaptive	23
Non-adaptive	26	Non-adaptive	29
Non-adaptive	38	Non-adaptive	32
Non-adaptive	20	Non-adaptive	30
Non-adaptive	28	Non-adaptive	20
Non-adaptive	23	Non-adaptive	24
Non-adaptive	26	Non-adaptive	15
Non-adaptive	32	Non-adaptive	24
Non-adaptive	23	Non-adaptive	28
Non-adaptive	26	Non-adaptive	18
Non-adaptive	32	Non-adaptive	23
Non-adaptive	27	Non-adaptive	24
Non-adaptive	32	Non-adaptive	27
Non-adaptive	31	Non-adaptive	21
Non-adaptive	26	Non-adaptive	28
Non-adaptive	25	Non-adaptive	21
Non-adaptive	27	Non-adaptive	31
Non-adaptive	31	Non-adaptive	25
Non-adaptive	35	Non-adaptive	12
Non-adaptive	28	Non-adaptive	19
Non-adaptive	20	Non-adaptive	22
Non-adaptive	28	Non-adaptive	24
Non-adaptive	29	Non-adaptive	18
Non-adaptive	30	Non-adaptive	19
Non-adaptive	32	Non-adaptive	25
Non-adaptive	36	Non-adaptive	29
Non-adaptive	27	Non-adaptive	17
Non-adaptive	29	Non-adaptive	25
Non-adaptive	29	Non-adaptive	18
Non-adaptive	33	Non-adaptive	28
Non-adaptive	26	Non-adaptive	25
Non-adaptive	26	Non-adaptive	36
Non-adaptive	26	Non-adaptive	32
Non-adaptive	33	Non-adaptive	23
Non-adaptive	29	Non-adaptive	16
Non-adaptive	25	Non-adaptive	23
Non-adaptive	29	Non-adaptive	20
Non-adaptive	31	Non-adaptive	30
Non-adaptive	18	Non-adaptive	29
Non-adaptive	19	Non-adaptive	29
Non-adaptive	27	Non-adaptive	23
Non-adaptive	24	Non-adaptive	19
Non-adaptive	24	Non-adaptive	19
Non-adaptive	32	Non-adaptive	20
Non-adaptive	28	Non-adaptive	19
Non-adaptive	19	Non-adaptive	19
Non-adaptive	28	Non-adaptive	25
Non-adaptive	18	Non-adaptive	16
Non-adaptive	23	Non-adaptive	24
Non-adaptive	23	Non-adaptive	20
Non-adaptive	23	Non-adaptive	23
Non-adaptive	21	Non-adaptive	22
Non-adaptive	39	Non-adaptive	32
Non-adaptive	25	Non-adaptive	21
Non-adaptive	39	Non-adaptive	28
Non-adaptive	30	Non-adaptive	23
Non-adaptive	37	Non-adaptive	23
Non-adaptive	32	Non-adaptive	15
Non-adaptive	26	Non-adaptive	16
Non-adaptive	24	Non-adaptive	25
Non-adaptive	28	Non-adaptive	19
Non-adaptive	26	Non-adaptive	20
Non-adaptive	32	Non-adaptive	32
Non-adaptive	26	Non-adaptive	16
Non-adaptive	37	Non-adaptive	18
Non-adaptive	27	Non-adaptive	23
Non-adaptive	27	Non-adaptive	24
Non-adaptive	29	Non-adaptive	21
Non-adaptive	20	Non-adaptive	23
Non-adaptive	25	Non-adaptive	23
Non-adaptive	24	Non-adaptive	24
Non-adaptive	20	Non-adaptive	28
Non-adaptive	25	Non-adaptive	21
Non-adaptive	36	Non-adaptive	16
Non-adaptive	28	Non-adaptive	36
Non-adaptive	23	Non-adaptive	22
Non-adaptive	22	Non-adaptive	21
Non-adaptive	31	Non-adaptive	18
Non-adaptive	31	Non-adaptive	20
Non-adaptive	29	Non-adaptive	21
Non-adaptive	38	Non-adaptive	17
Non-adaptive	23	Non-adaptive	15
Non-adaptive	28	Non-adaptive	24
Non-adaptive	40	Non-adaptive	25
Non-adaptive	20	Non-adaptive	26
Non-adaptive	33	Non-adaptive	23
Non-adaptive	27	Non-adaptive	22
Non-adaptive	24	Non-adaptive	18
Non-adaptive	23	Non-adaptive	22
Non-adaptive	23	Non-adaptive	25
Non-adaptive	28	Non-adaptive	25
Non-adaptive	27	Non-adaptive	28
Non-adaptive	27	Non-adaptive	20
Non-adaptive	25	Non-adaptive	28
Non-adaptive	34	Non-adaptive	22
Non-adaptive	31	Non-adaptive	24
Non-adaptive	30	Non-adaptive	21
Non-adaptive	26	Non-adaptive	24
Non-adaptive	29	Non-adaptive	26
Non-adaptive	24	Non-adaptive	19
Non-adaptive	30	Non-adaptive	18
Non-adaptive	39	Non-adaptive	29
Non-adaptive	30	Non-adaptive	22
Non-adaptive	29	Non-adaptive	20
Non-adaptive	28	Non-adaptive	24
Non-adaptive	33	Non-adaptive	23
Non-adaptive	25	Non-adaptive	20
Non-adaptive	34	Non-adaptive	20
Non-adaptive	32	Non-adaptive	21
Non-adaptive	31	Non-adaptive	16
Non-adaptive	31	Non-adaptive	22
Non-adaptive	26	Non-adaptive	25
Non-adaptive	34	Non-adaptive	25
Non-adaptive	22	Non-adaptive	28
Non-adaptive	38	Non-adaptive	25
Non-adaptive	23	Non-adaptive	23
Non-adaptive	22	Non-adaptive	23
Non-adaptive	31	Non-adaptive	19
Non-adaptive	21	Non-adaptive	27
Non-adaptive	25	Non-adaptive	17
Non-adaptive	31	Non-adaptive	32
Non-adaptive	25	Non-adaptive	16
Non-adaptive	19	Non-adaptive	24
Non-adaptive	26	Non-adaptive	27
Non-adaptive	32	Non-adaptive	26
Non-adaptive	24	Non-adaptive	24
Non-adaptive	23	Non-adaptive	19
Non-adaptive	35	Non-adaptive	21
Non-adaptive	22	Non-adaptive	29
Non-adaptive	24	Non-adaptive	23
Non-adaptive	23	Non-adaptive	15
Non-adaptive	29	Non-adaptive	22
Non-adaptive	22	Non-adaptive	25
Non-adaptive	36	Non-adaptive	20
Non-adaptive	34	Non-adaptive	21
Non-adaptive	26	Non-adaptive	23
Non-adaptive	25	Non-adaptive	24
Non-adaptive	34	Non-adaptive	32
Non-adaptive	26	Non-adaptive	29
Non-adaptive	31	Non-adaptive	29
Non-adaptive	29	Non-adaptive	14
Non-adaptive	34	Non-adaptive	26
Non-adaptive	22	Non-adaptive	20
Non-adaptive	38	Non-adaptive	24
Non-adaptive	37	Non-adaptive	25
Non-adaptive	29	Non-adaptive	24
Non-adaptive	23	Non-adaptive	24
Non-adaptive	30	Non-adaptive	18
Non-adaptive	21	Non-adaptive	36
Non-adaptive	30	Non-adaptive	27
Non-adaptive	29	Non-adaptive	21
Non-adaptive	29	Non-adaptive	23
Non-adaptive	30	Non-adaptive	23
Non-adaptive	28	Non-adaptive	30
Non-adaptive	27	Non-adaptive	21
Non-adaptive	19	Non-adaptive	23
Non-adaptive	26	Non-adaptive	23
Non-adaptive	29	Non-adaptive	27
Non-adaptive	31	Non-adaptive	19
Non-adaptive	34	Non-adaptive	22
Non-adaptive	33	Non-adaptive	22
Non-adaptive	26	Non-adaptive	24
Non-adaptive	24	Non-adaptive	30
Non-adaptive	33	Non-adaptive	25
Non-adaptive	34	Non-adaptive	20
Non-adaptive	25	Non-adaptive	19
Non-adaptive	36	Non-adaptive	30
Non-adaptive	28	Non-adaptive	26
Non-adaptive	28	Non-adaptive	24
Non-adaptive	32	Non-adaptive	25
Non-adaptive	28	Non-adaptive	27
Non-adaptive	34	Non-adaptive	24
Non-adaptive	26	Non-adaptive	23
Non-adaptive	30	Non-adaptive	19
Non-adaptive	33	Non-adaptive	18
Non-adaptive	23	Non-adaptive	17
Non-adaptive	19	Non-adaptive	23
Non-adaptive	17	Non-adaptive	24
Non-adaptive	27	Non-adaptive	29
Non-adaptive	30	Non-adaptive	22
Non-adaptive	28	Non-adaptive	19
Non-adaptive	32	Non-adaptive	31
Non-adaptive	16	Non-adaptive	24
Non-adaptive	30	Non-adaptive	27
Non-adaptive	39	Non-adaptive	24
Non-adaptive	25	Non-adaptive	22
Non-adaptive	31	Non-adaptive	29
Non-adaptive	33	Non-adaptive	23
Non-adaptive	25	Non-adaptive	34
Non-adaptive	30	Non-adaptive	13
Non-adaptive	13	Non-adaptive	23
Non-adaptive	27	Non-adaptive	22
Non-adaptive	31	Non-adaptive	16
Non-adaptive	30	Non-adaptive	21
Non-adaptive	24	Non-adaptive	29
Non-adaptive	21	Non-adaptive	16
Non-adaptive	29	Non-adaptive	26
Non-adaptive	31	Non-adaptive	22
Non-adaptive	29	Non-adaptive	22
Non-adaptive	32	Non-adaptive	16
Non-adaptive	30	Non-adaptive	27
Non-adaptive	40	Non-adaptive	23
Non-adaptive	34	Non-adaptive	23
Non-adaptive	31	Non-adaptive	20
Non-adaptive	30	Non-adaptive	31
Non-adaptive	26	Non-adaptive	24
Non-adaptive	30	Non-adaptive	20
Non-adaptive	28	Non-adaptive	21
Non-adaptive	24	Non-adaptive	19
Non-adaptive	30	Non-adaptive	30
Non-adaptive	20	Non-adaptive	18
Non-adaptive	25	Non-adaptive	24
Non-adaptive	31	Non-adaptive	28
Non-adaptive	27	Non-adaptive	27
Non-adaptive	19	Non-adaptive	21
Non-adaptive	29	Non-adaptive	22
Non-adaptive	31	Non-adaptive	22
Non-adaptive	22	Non-adaptive	23
Non-adaptive	22	Non-adaptive	30
Non-adaptive	25	Non-adaptive	19
Non-adaptive	27	Non-adaptive	25
Non-adaptive	40	Non-adaptive	21
Non-adaptive	34	Non-adaptive	25
Non-adaptive	31	Non-adaptive	33
Non-adaptive	31	Non-adaptive	29
Non-adaptive	28	Non-adaptive	30
Non-adaptive	33	Non-adaptive	23
Non-adaptive	27	Non-adaptive	25
Non-adaptive	34	Non-adaptive	25
Non-adaptive	26	Non-adaptive	25
Non-adaptive	31	Non-adaptive	26
Non-adaptive	26	Non-adaptive	18
Non-adaptive	32	Non-adaptive	21
Non-adaptive	26	Non-adaptive	20
Non-adaptive	29	Non-adaptive	21
Non-adaptive	24	Non-adaptive	31
Non-adaptive	17	Non-adaptive	19
Non-adaptive	25	Non-adaptive	28
Non-adaptive	28	Non-adaptive	19
Non-adaptive	23	Non-adaptive	21
Non-adaptive	35	Non-adaptive	25
Non-adaptive	28	Non-adaptive	17
Non-adaptive	28	Non-adaptive	27
Non-adaptive	30	Non-adaptive	17
Non-adaptive	24	Non-adaptive	20
Non-adaptive	32	Non-adaptive	25
Non-adaptive	21	Non-adaptive	26
Non-adaptive	29	Non-adaptive	22
Non-adaptive	33	Non-adaptive	21
Non-adaptive	27	Non-adaptive	23
Non-adaptive	29	Non-adaptive	24
Non-adaptive	27	Non-adaptive	24
Non-adaptive	28	Non-adaptive	23
Non-adaptive	28	Non-adaptive	18
Non-adaptive	32	Non-adaptive	25
Non-adaptive	26	Non-adaptive	25
Non-adaptive	36	Non-adaptive	22
Non-adaptive	28	Non-adaptive	18
Non-adaptive	37	Non-adaptive	18
Non-adaptive	35	Non-adaptive	28
Non-adaptive	30	Non-adaptive	29
Non-adaptive	30	Non-adaptive	21
Non-adaptive	29	Non-adaptive	23
Non-adaptive	27	Non-adaptive	26
Non-adaptive	27	Non-adaptive	31
Non-adaptive	39	Non-adaptive	21
Non-adaptive	31	Non-adaptive	19
Non-adaptive	37	Non-adaptive	15
Non-adaptive	36	Non-adaptive	19
Non-adaptive	36	Non-adaptive	30
Non-adaptive	36	Non-adaptive	20
Non-adaptive	37	Non-adaptive	27
Non-adaptive	28	Non-adaptive	22
Non-adaptive	25	Non-adaptive	17
Non-adaptive	34	Non-adaptive	19
Non-adaptive	24	Non-adaptive	28
Non-adaptive	27	Non-adaptive	24
Non-adaptive	29	Non-adaptive	27
Non-adaptive	28	Non-adaptive	28
Non-adaptive	34	Non-adaptive	36
Non-adaptive	24	Non-adaptive	20
Non-adaptive	35	Non-adaptive	26
Non-adaptive	20	Non-adaptive	19
Non-adaptive	27	Non-adaptive	21
Non-adaptive	32	Non-adaptive	16
Non-adaptive	40	Non-adaptive	18
Non-adaptive	28	Non-adaptive	24
Non-adaptive	22	Non-adaptive	24
Non-adaptive	26	Non-adaptive	21
Non-adaptive	21	Non-adaptive	23
Non-adaptive	31	Non-adaptive	22
Non-adaptive	40	Non-adaptive	29
Non-adaptive	29	Non-adaptive	29
Non-adaptive	29	Non-adaptive	15
Non-adaptive	24	Non-adaptive	19
Non-adaptive	21	Non-adaptive	21
Non-adaptive	26	Non-adaptive	19
Non-adaptive	27	Non-adaptive	26
Non-adaptive	26	Non-adaptive	26
Non-adaptive	27	Non-adaptive	28
Non-adaptive	26	Non-adaptive	26
Non-adaptive	30	Non-adaptive	21
Non-adaptive	19	Non-adaptive	22
Non-adaptive	29	Non-adaptive	24
Non-adaptive	27	Non-adaptive	18
Non-adaptive	25	Non-adaptive	20
Non-adaptive	28	Non-adaptive	18
Non-adaptive	24	Non-adaptive	27
Non-adaptive	25	Non-adaptive	13
Non-adaptive	27	Non-adaptive	32
Non-adaptive	26	Non-adaptive	23
Non-adaptive	26	Non-adaptive	25
Non-adaptive	28	Non-adaptive	23
Non-adaptive	36	Non-adaptive	22
Non-adaptive	31	Non-adaptive	18
Non-adaptive	30	Non-adaptive	20
Non-adaptive	24	Non-adaptive	17
Non-adaptive	35	Non-adaptive	16
Non-adaptive	32	Non-adaptive	26
Non-adaptive	41	Non-adaptive	20
Non-adaptive	34	Non-adaptive	22
Non-adaptive	23	Non-adaptive	26
Non-adaptive	21	Non-adaptive	26
Non-adaptive	30	Non-adaptive	28
Non-adaptive	24	Non-adaptive	33
Non-adaptive	32	Non-adaptive	31
Non-adaptive	34	Non-adaptive	20
Non-adaptive	28	Non-adaptive	23
Non-adaptive	26	Non-adaptive	21
Non-adaptive	23	Non-adaptive	17
Non-adaptive	26	Non-adaptive	19
Non-adaptive	38	Non-adaptive	26
Non-adaptive	24	Non-adaptive	22
Non-adaptive	26	Non-adaptive	24
Non-adaptive	11	Non-adaptive	25
Non-adaptive	25	Non-adaptive	29
Non-adaptive	25	Non-adaptive	33
Non-adaptive	34	Non-adaptive	29
Non-adaptive	24	Non-adaptive	31
Non-adaptive	39	Non-adaptive	25
Non-adaptive	28	Non-adaptive	22
Non-adaptive	29	Non-adaptive	25
Non-adaptive	25	Non-adaptive	24
Non-adaptive	30	Non-adaptive	24
Non-adaptive	21	Non-adaptive	15
Non-adaptive	27	Non-adaptive	21
Non-adaptive	27	Non-adaptive	23
Non-adaptive	30	Non-adaptive	30
Non-adaptive	29	Non-adaptive	31
Non-adaptive	28	Non-adaptive	24
Non-adaptive	21	Non-adaptive	30
Non-adaptive	28	Non-adaptive	27
Non-adaptive	28	Non-adaptive	20
Non-adaptive	32	Non-adaptive	21
Non-adaptive	27	Non-adaptive	29
Non-adaptive	33	Non-adaptive	24
Non-adaptive	30	Non-adaptive	28
Non-adaptive	29	Non-adaptive	18
Non-adaptive	26	Non-adaptive	21
Non-adaptive	26	Non-adaptive	23
Non-adaptive	29	Non-adaptive	17
Non-adaptive	36	Non-adaptive	23
Non-adaptive	28	Non-adaptive	19
Non-adaptive	27	Non-adaptive	26
Non-adaptive	23	Non-adaptive	21
Non-adaptive	33	Non-adaptive	25
Non-adaptive	23	Non-adaptive	16
Non-adaptive	23	Non-adaptive	22
Non-adaptive	35	Non-adaptive	21
Non-adaptive	28	Non-adaptive	31
Non-adaptive	30	Non-adaptive	33
Non-adaptive	31	Non-adaptive	23
Non-adaptive	27	Non-adaptive	16
Non-adaptive	27	Non-adaptive	16
Non-adaptive	25	Non-adaptive	18
Non-adaptive	31	Non-adaptive	23
Non-adaptive	29	Non-adaptive	22
Non-adaptive	37	Non-adaptive	21
Non-adaptive	20	Non-adaptive	22
Non-adaptive	28	Non-adaptive	19
Non-adaptive	26	Non-adaptive	24
Non-adaptive	34	Non-adaptive	29
Non-adaptive	29	Non-adaptive	27
Non-adaptive	35	Non-adaptive	23
Non-adaptive	23	Non-adaptive	25
Non-adaptive	30	Non-adaptive	24
Non-adaptive	23	Non-adaptive	21
Non-adaptive	27	Non-adaptive	16
Non-adaptive	24	Non-adaptive	28
Non-adaptive	26	Non-adaptive	23
Non-adaptive	25	Non-adaptive	25
Non-adaptive	26	Non-adaptive	20
Non-adaptive	28	Non-adaptive	22
Non-adaptive	24	Non-adaptive	23
Non-adaptive	23	Non-adaptive	25
Non-adaptive	32	Non-adaptive	14
Non-adaptive	32	Non-adaptive	26
Non-adaptive	27	Non-adaptive	27
Non-adaptive	26	Non-adaptive	24
Non-adaptive	37	Non-adaptive	22
Non-adaptive	43	Non-adaptive	24
Non-adaptive	32	Non-adaptive	21
Non-adaptive	32	Non-adaptive	22
Non-adaptive	26	Non-adaptive	16
Non-adaptive	21	Non-adaptive	21
Non-adaptive	29	Non-adaptive	25
Non-adaptive	25	Non-adaptive	23
Non-adaptive	28	Non-adaptive	28
Non-adaptive	26	Non-adaptive	13
Non-adaptive	25	Non-adaptive	29
Non-adaptive	26	Non-adaptive	22
Non-adaptive	42	Non-adaptive	29
Non-adaptive	26	Non-adaptive	16
Non-adaptive	23	Non-adaptive	17
Non-adaptive	31	Non-adaptive	24
Non-adaptive	21	Non-adaptive	28
Non-adaptive	21	Non-adaptive	21
Non-adaptive	33	Non-adaptive	30
Non-adaptive	31	Non-adaptive	25
Non-adaptive	30	Non-adaptive	20
Non-adaptive	31	Non-adaptive	22
Non-adaptive	34	Non-adaptive	14
Non-adaptive	36	Non-adaptive	25
Non-adaptive	35	Non-adaptive	19
Non-adaptive	24	Non-adaptive	15
Non-adaptive	24	Non-adaptive	22
Non-adaptive	25	Non-adaptive	25
Non-adaptive	33	Non-adaptive	27
Non-adaptive	33	Non-adaptive	12
Non-adaptive	31	Non-adaptive	20
Non-adaptive	32	Non-adaptive	27
Non-adaptive	30	Non-adaptive	22
Non-adaptive	13	Non-adaptive	22
Non-adaptive	22	Non-adaptive	18
Non-adaptive	32	Non-adaptive	20
Non-adaptive	24	Non-adaptive	24
Non-adaptive	43	Non-adaptive	29
Non-adaptive	31	Non-adaptive	25
Non-adaptive	28	Non-adaptive	30
Non-adaptive	23	Non-adaptive	27
Non-adaptive	28	Non-adaptive	22
Non-adaptive	29	Non-adaptive	22
Non-adaptive	30	Non-adaptive	24
Non-adaptive	21	Non-adaptive	31
Non-adaptive	22	Non-adaptive	17
Non-adaptive	27	Non-adaptive	19
Non-adaptive	27	Non-adaptive	22
Non-adaptive	36	Non-adaptive	25
Non-adaptive	18	Non-adaptive	26
Non-adaptive	20	Non-adaptive	28
Non-adaptive	37	Non-adaptive	28
Non-adaptive	26	Non-adaptive	24
Non-adaptive	21	Non-adaptive	23
Non-adaptive	33	Non-adaptive	20
Non-adaptive	24	Non-adaptive	27
Non-adaptive	29	Non-adaptive	23
Non-adaptive	29	Non-adaptive	26
Non-adaptive	24	Non-adaptive	26
Non-adaptive	22	Non-adaptive	28
Non-adaptive	30	Non-adaptive	21
Non-adaptive	35	Non-adaptive	22
Non-adaptive	25	Non-adaptive	23
Non-adaptive	25	Non-adaptive	20
Non-adaptive	35	Non-adaptive	29
Non-adaptive	23	Non-adaptive	28
Non-adaptive	33	Non-adaptive	21
Non-adaptive	23	Non-adaptive	24
Non-adaptive	31	Non-adaptive	33
Non-adaptive	42	Non-adaptive	22
Non-adaptive	30	Non-adaptive	21
Non-adaptive	25	Non-adaptive	18
Non-adaptive	27	Non-adaptive	24
Non-adaptive	30	Non-adaptive	22
Non-adaptive	28	Non-adaptive	16
Non-adaptive	22	Non-adaptive	22
Non-adaptive	18	Non-adaptive	19
Non-adaptive	34	Non-adaptive	31
Non-adaptive	33	Non-adaptive	29
Non-adaptive	21	Non-adaptive	21
Non-adaptive	32	Non-adaptive	27
Non-adaptive	25	Non-adaptive	22
Non-adaptive	35	Non-adaptive	21
Non-adaptive	31	Non-adaptive	23
Non-adaptive	44	Non-adaptive	15
Non-adaptive	23	Non-adaptive	23
Non-adaptive	18	Non-adaptive	15
Non-adaptive	31	Non-adaptive	22
Non-adaptive	30	Non-adaptive	26
Non-adaptive	36	Non-adaptive	23
Non-adaptive	33	Non-adaptive	17
Non-adaptive	38	Non-adaptive	26
Non-adaptive	24	Non-adaptive	22
Non-adaptive	21	Non-adaptive	15
Non-adaptive	27	Non-adaptive	23
Non-adaptive	27	Non-adaptive	23
Non-adaptive	33	Non-adaptive	23
Non-adaptive	29	Non-adaptive	17
Non-adaptive	24	Non-adaptive	24
Non-adaptive	25	Non-adaptive	23
Non-adaptive	33	Non-adaptive	25
Non-adaptive	23	Non-adaptive	21
Non-adaptive	24	Non-adaptive	24
Non-adaptive	25	Non-adaptive	25
Non-adaptive	26	Non-adaptive	28
Non-adaptive	22	Non-adaptive	20
Non-adaptive	36	Non-adaptive	20
Non-adaptive	28	Non-adaptive	20
Non-adaptive	35	Non-adaptive	28
Non-adaptive	27	Non-adaptive	26
Non-adaptive	30	Non-adaptive	19
Non-adaptive	25	Non-adaptive	20
Non-adaptive	32	Non-adaptive	23
Non-adaptive	31	Non-adaptive	20
Non-adaptive	16	Non-adaptive	26
Non-adaptive	27	Non-adaptive	24
Non-adaptive	28	Non-adaptive	25
Non-adaptive	30	Non-adaptive	19
Non-adaptive	31	Non-adaptive	27
Non-adaptive	24	Non-adaptive	35
Non-adaptive	32	Non-adaptive	29
Non-adaptive	29	Non-adaptive	19
Non-adaptive	27	Non-adaptive	33
Non-adaptive	24	Non-adaptive	22
Non-adaptive	36	Non-adaptive	19
Non-adaptive	28	Non-adaptive	26
Non-adaptive	31	Non-adaptive	23
Non-adaptive	29	Non-adaptive	25
Non-adaptive	29	Non-adaptive	19
Non-adaptive	33	Non-adaptive	28
Non-adaptive	31	Non-adaptive	24
Non-adaptive	40	Non-adaptive	28
Non-adaptive	24	Non-adaptive	20
Non-adaptive	33	Non-adaptive	17
Non-adaptive	25	Non-adaptive	23
Non-adaptive	27	Non-adaptive	18
Non-adaptive	14	Non-adaptive	21
Non-adaptive	20	Non-adaptive	26
Non-adaptive	36	Non-adaptive	23
Non-adaptive	30	Non-adaptive	23
Non-adaptive	24	Non-adaptive	25
Non-adaptive	26	Non-adaptive	29
Non-adaptive	28	Non-adaptive	19
Non-adaptive	26	Non-adaptive	23
Non-adaptive	27	Non-adaptive	23
Non-adaptive	22	Non-adaptive	17
Non-adaptive	21	Non-adaptive	26
Non-adaptive	26	Non-adaptive	27
Non-adaptive	20	Non-adaptive	20
Non-adaptive	35	Non-adaptive	23
Non-adaptive	29	Non-adaptive	29
Non-adaptive	20	Non-adaptive	23
Non-adaptive	29	Non-adaptive	21
Non-adaptive	27	Non-adaptive	22
Non-adaptive	35	Non-adaptive	23
Non-adaptive	32	Non-adaptive	24
Non-adaptive	24	Non-adaptive	22
Non-adaptive	26	Non-adaptive	24
Non-adaptive	27	Non-adaptive	24
Non-adaptive	29	Non-adaptive	24
Non-adaptive	31	Non-adaptive	18
Non-adaptive	26	Non-adaptive	25
Non-adaptive	24	Non-adaptive	31
Non-adaptive	31	Non-adaptive	26
Non-adaptive	28	Non-adaptive	21
Non-adaptive	30	Non-adaptive	18
Non-adaptive	23	Non-adaptive	19
Non-adaptive	25	Non-adaptive	22
Non-adaptive	25	Non-adaptive	19
Non-adaptive	32	Non-adaptive	21
Non-adaptive	29	Non-adaptive	25
Non-adaptive	33	Non-adaptive	21
Non-adaptive	36	Non-adaptive	26
Non-adaptive	28	Non-adaptive	24
Non-adaptive	22	Non-adaptive	34
Non-adaptive	27	Non-adaptive	18
Non-adaptive	32	Non-adaptive	22
Non-adaptive	29	Non-adaptive	30
Non-adaptive	32	Non-adaptive	20
Non-adaptive	26	Non-adaptive	15
Non-adaptive	20	Non-adaptive	27
Non-adaptive	33	Non-adaptive	21
Non-adaptive	47	Non-adaptive	17
Non-adaptive	31	Non-adaptive	20
Non-adaptive	33	Non-adaptive	19
Non-adaptive	26	Non-adaptive	29
Non-adaptive	28	Non-adaptive	18
Non-adaptive	34	Non-adaptive	25
Non-adaptive	33	Non-adaptive	32
Non-adaptive	28	Non-adaptive	24
Non-adaptive	22	Non-adaptive	16
Non-adaptive	28	Non-adaptive	20
Non-adaptive	24	Non-adaptive	27
Non-adaptive	32	Non-adaptive	22
Non-adaptive	24	Non-adaptive	21
Non-adaptive	28	Non-adaptive	21
Non-adaptive	26	Non-adaptive	19
Non-adaptive	21	Non-adaptive	26
Non-adaptive	34	Non-adaptive	23
Non-adaptive	29	Non-adaptive	28
Non-adaptive	29	Non-adaptive	28
Non-adaptive	22	Non-adaptive	25
Non-adaptive	34	Non-adaptive	23
Non-adaptive	23	Non-adaptive	27
Non-adaptive	25	Non-adaptive	17
Non-adaptive	26	Non-adaptive	30
Non-adaptive	32	Non-adaptive	24
Non-adaptive	27	Non-adaptive	37
Non-adaptive	27	Non-adaptive	27
Non-adaptive	24	Non-adaptive	28
Non-adaptive	21	Non-adaptive	19
Non-adaptive	25	Non-adaptive	23
Non-adaptive	33	Non-adaptive	32
Non-adaptive	14	Non-adaptive	22
Non-adaptive	40	Non-adaptive	21
Non-adaptive	30	Non-adaptive	21
Non-adaptive	21	Non-adaptive	24
Non-adaptive	18	Non-adaptive	20
Non-adaptive	31	Non-adaptive	28
Non-adaptive	35	Non-adaptive	24
Non-adaptive	30	Non-adaptive	25
Non-adaptive	26	Non-adaptive	26
Non-adaptive	30	Non-adaptive	22
Non-adaptive	36	Non-adaptive	23
Non-adaptive	25	Non-adaptive	21
Non-adaptive	32	Non-adaptive	20
Non-adaptive	19	Non-adaptive	26
Non-adaptive	37	Non-adaptive	22
Non-adaptive	25	Non-adaptive	23
Non-adaptive	24	Non-adaptive	28
Non-adaptive	26	Non-adaptive	22
Non-adaptive	26	Non-adaptive	35
Non-adaptive	26	Non-adaptive	28
Non-adaptive	17	Non-adaptive	28
Non-adaptive	25	Non-adaptive	15
Non-adaptive	34	Non-adaptive	12
Non-adaptive	26	Non-adaptive	21
Non-adaptive	31	Non-adaptive	22
Non-adaptive	30	Non-adaptive	23
Non-adaptive	27	Non-adaptive	23
Non-adaptive	26	Non-adaptive	25
Non-adaptive	22	Non-adaptive	23
Non-adaptive	22	Non-adaptive	29
Non-adaptive	30	Non-adaptive	15
Non-adaptive	27	Non-adaptive	23
Non-adaptive	27	Non-adaptive	19
Non-adaptive	24	Non-adaptive	27
Non-adaptive	28	Non-adaptive	31
Non-adaptive	30	Non-adaptive	30
Non-adaptive	23	Non-adaptive	17
Non-adaptive	24	Non-adaptive	28
Non-adaptive	36	Non-adaptive	22
Non-adaptive	33	Non-adaptive	29
Non-adaptive	23	Non-adaptive	26
Non-adaptive	36	Non-adaptive	38
Non-adaptive	23	Non-adaptive	35
Non-adaptive	33	Non-adaptive	10
Non-adaptive	36	Non-adaptive	11
Non-adaptive	26	Non-adaptive	24
Non-adaptive	24	Non-adaptive	25
Non-adaptive	23	Non-adaptive	29
Non-adaptive	37	Non-adaptive	25
Non-adaptive	28	Non-adaptive	16
Non-adaptive	26	Non-adaptive	22
Non-adaptive	30	Non-adaptive	22
Non-adaptive	26	Non-adaptive	18
Non-adaptive	27	Non-adaptive	23
Non-adaptive	35	Non-adaptive	29
Non-adaptive	26	Non-adaptive	26
Non-adaptive	28	Non-adaptive	18
Non-adaptive	33	Non-adaptive	26
Non-adaptive	35	Non-adaptive	31
Non-adaptive	21	Non-adaptive	29
Non-adaptive	23	Non-adaptive	19
Non-adaptive	41	Non-adaptive	15
Non-adaptive	24	Non-adaptive	21
Non-adaptive	31	Non-adaptive	21
Non-adaptive	20	Non-adaptive	26
Non-adaptive	23	Non-adaptive	37
Non-adaptive	38	Non-adaptive	31
Non-adaptive	24	Non-adaptive	15
Non-adaptive	26	Non-adaptive	25
Non-adaptive	34	Non-adaptive	14
Non-adaptive	22	Non-adaptive	25
Non-adaptive	24	Non-adaptive	16
Non-adaptive	26	Non-adaptive	19
Non-adaptive	32	Non-adaptive	19
Non-adaptive	24	Non-adaptive	15
Non-adaptive	32	Non-adaptive	19
Non-adaptive	32	Non-adaptive	31
Non-adaptive	28	Non-adaptive	19
Non-adaptive	36	Non-adaptive	24
Non-adaptive	24	Non-adaptive	22
Non-adaptive	27	Non-adaptive	36
Non-adaptive	35	Non-adaptive	24
Non-adaptive	24	Non-adaptive	17
Non-adaptive	29	Non-adaptive	20
Non-adaptive	31	Non-adaptive	23
Non-adaptive	37	Non-adaptive	16
Non-adaptive	27	Non-adaptive	30
Non-adaptive	32	Non-adaptive	23
Non-adaptive	30	Non-adaptive	21
Non-adaptive	35	Non-adaptive	22
Non-adaptive	26	Non-adaptive	41
Non-adaptive	30	Non-adaptive	22
Non-adaptive	28	Non-adaptive	31
Non-adaptive	32	Non-adaptive	23
Non-adaptive	27	Non-adaptive	26
Non-adaptive	37	Non-adaptive	30
Non-adaptive	24	Non-adaptive	30
Non-adaptive	33	Non-adaptive	25
Non-adaptive	33	Non-adaptive	26
Non-adaptive	27	Non-adaptive	26
Non-adaptive	30	Non-adaptive	20
Non-adaptive	26	Non-adaptive	24
Non-adaptive	32	Non-adaptive	24
Non-adaptive	27	Non-adaptive	21
Non-adaptive	27	Non-adaptive	22
Non-adaptive	27	Non-adaptive	24
Non-adaptive	17	Non-adaptive	26
Non-adaptive	30	Non-adaptive	25
Non-adaptive	28	Non-adaptive	24
Non-adaptive	35	Non-adaptive	24
Non-adaptive	25	Non-adaptive	19
Non-adaptive	17	Non-adaptive	23
Non-adaptive	25	Non-adaptive	29
Non-adaptive	26	Non-adaptive	25
Non-adaptive	33	Non-adaptive	28
Non-adaptive	21	Non-adaptive	28
Non-adaptive	29	Non-adaptive	23
Non-adaptive	32	Non-adaptive	26
Non-adaptive	24	Non-adaptive	18
Non-adaptive	34	Non-adaptive	28
Non-adaptive	32	Non-adaptive	20
Non-adaptive	31	Non-adaptive	25
Non-adaptive	40	Non-adaptive	14
Non-adaptive	21	Non-adaptive	22
Non-adaptive	23	Non-adaptive	29
Non-adaptive	24	Non-adaptive	27
Non-adaptive	17	Non-adaptive	24
Non-adaptive	29	Non-adaptive	28
Non-adaptive	31	Non-adaptive	24
Non-adaptive	31	Non-adaptive	24
Non-adaptive	28	Non-adaptive	28
Non-adaptive	27	Non-adaptive	21
Non-adaptive	24	Non-adaptive	19
Non-adaptive	28	Non-adaptive	16
Non-adaptive	36	Non-adaptive	19
Non-adaptive	33	Non-adaptive	24
Non-adaptive	25	Non-adaptive	14
Non-adaptive	22	Non-adaptive	22
Non-adaptive	26	Non-adaptive	21
Non-adaptive	21	Non-adaptive	23
Non-adaptive	28	Non-adaptive	30
Non-adaptive	29	Non-adaptive	24
Non-adaptive	37	Non-adaptive	27
Non-adaptive	34	Non-adaptive	30
Non-adaptive	28	Non-adaptive	16
Non-adaptive	26	Non-adaptive	27
Non-adaptive	27	Non-adaptive	24
Non-adaptive	27	Non-adaptive	20
Non-adaptive	28	Non-adaptive	22
Non-adaptive	23	Non-adaptive	22
Non-adaptive	25	Non-adaptive	21
Non-adaptive	27	Non-adaptive	24
Non-adaptive	27	Non-adaptive	26
Non-adaptive	41	Non-adaptive	23
Non-adaptive	30	Non-adaptive	20
Non-adaptive	28	Non-adaptive	24
Non-adaptive	29	Non-adaptive	20
Non-adaptive	28	Non-adaptive	23
Non-adaptive	30	Non-adaptive	18
Non-adaptive	26	Non-adaptive	25
Non-adaptive	25	Non-adaptive	30
Non-adaptive	29	Non-adaptive	25
Non-adaptive	29	Non-adaptive	23
Non-adaptive	33	Non-adaptive	20
Non-adaptive	35	Non-adaptive	21
Non-adaptive	31	Non-adaptive	28
Non-adaptive	27	Non-adaptive	27
Non-adaptive	26	Non-adaptive	22
Non-adaptive	22	Non-adaptive	20
Non-adaptive	36	Non-adaptive	26
Non-adaptive	21	Non-adaptive	17
Non-adaptive	34	Non-adaptive	23
Non-adaptive	27	Non-adaptive	26
Non-adaptive	45	Non-adaptive	21
Non-adaptive	28	Non-adaptive	26
Non-adaptive	26	Non-adaptive	26
Non-adaptive	30	Non-adaptive	17
Non-adaptive	28	Non-adaptive	18
Non-adaptive	26	Non-adaptive	23
Non-adaptive	22	Non-adaptive	20
Non-adaptive	31	Non-adaptive	25
Non-adaptive	30	Non-adaptive	28
Non-adaptive	23	Non-adaptive	19
Non-adaptive	25	Non-adaptive	30
Non-adaptive	32	Non-adaptive	17
Non-adaptive	20	Non-adaptive	30
Non-adaptive	32	Non-adaptive	20
Non-adaptive	34	Non-adaptive	19
Non-adaptive	31	Non-adaptive	23
Non-adaptive	27	Non-adaptive	16
Non-adaptive	25	Non-adaptive	22
Non-adaptive	36	Non-adaptive	21
Non-adaptive	33	Non-adaptive	30
Non-adaptive	25	Non-adaptive	24
Non-adaptive	27	Non-adaptive	24
Non-adaptive	34	Non-adaptive	29
Non-adaptive	23	Non-adaptive	18
Non-adaptive	28	Non-adaptive	28
Non-adaptive	21	Non-adaptive	31
Non-adaptive	24	Non-adaptive	32
Non-adaptive	32	Non-adaptive	22
Non-adaptive	21	Non-adaptive	22
Non-adaptive	22	Non-adaptive	28
Non-adaptive	31	Non-adaptive	17
Non-adaptive	26	Non-adaptive	20
Non-adaptive	13	Non-adaptive	29
Non-adaptive	30	Non-adaptive	19
Non-adaptive	36	Non-adaptive	23
Non-adaptive	24	Non-adaptive	22
Non-adaptive	29	Non-adaptive	26
Non-adaptive	27	Non-adaptive	24
Non-adaptive	21	Non-adaptive	14
Non-adaptive	31	Non-adaptive	22
Non-adaptive	28	Non-adaptive	22
Non-adaptive	21	Non-adaptive	29
Non-adaptive	22	Non-adaptive	28
Non-adaptive	20	Non-adaptive	29
Non-adaptive	21	Non-adaptive	31
Non-adaptive	30	Non-adaptive	29
Non-adaptive	25	Non-adaptive	17
Non-adaptive	25	Non-adaptive	26
Non-adaptive	21	Non-adaptive	23
Non-adaptive	27	Non-adaptive	18
Non-adaptive	24	Non-adaptive	22
Non-adaptive	32	Non-adaptive	23
Non-adaptive	28	Non-adaptive	24
Non-adaptive	25	Non-adaptive	18
Non-adaptive	24	Non-adaptive	21
Non-adaptive	23	Non-adaptive	22
Non-adaptive	28	Non-adaptive	26
Non-adaptive	24	Non-adaptive	23
Non-adaptive	37	Non-adaptive	27
Non-adaptive	26	Non-adaptive	23
Non-adaptive	32	Non-adaptive	25
Non-adaptive	19	Non-adaptive	16
Non-adaptive	35	Non-adaptive	16
Non-adaptive	36	Non-adaptive	20
Non-adaptive	22	Non-adaptive	24
Non-adaptive	38	Non-adaptive	20
Non-adaptive	31	Non-adaptive	21
Non-adaptive	25	Non-adaptive	22
Non-adaptive	33	Non-adaptive	24
Non-adaptive	31	Non-adaptive	23
Non-adaptive	27	Non-adaptive	14
Non-adaptive	31	Non-adaptive	19
Non-adaptive	16	Non-adaptive	19
Non-adaptive	26	Non-adaptive	24
Non-adaptive	33	Non-adaptive	22
Non-adaptive	26	Non-adaptive	21
Non-adaptive	28	Non-adaptive	26
Non-adaptive	28	Non-adaptive	22
Non-adaptive	36	Non-adaptive	29
Non-adaptive	30	Non-adaptive	19
Non-adaptive	23	Non-adaptive	15
Non-adaptive	33	Non-adaptive	24
Non-adaptive	25	Non-adaptive	24
Non-adaptive	26	Non-adaptive	27
Non-adaptive	39	Non-adaptive	20
Non-adaptive	37	Non-adaptive	20
Non-adaptive	19	Non-adaptive	25
Non-adaptive	43	Non-adaptive	20
Non-adaptive	28	Non-adaptive	19
Non-adaptive	35	Non-adaptive	28
Non-adaptive	31	Non-adaptive	21
Non-adaptive	33	Non-adaptive	25
Non-adaptive	20	Non-adaptive	31
Non-adaptive	24	Non-adaptive	29
Non-adaptive	35	Non-adaptive	20
Non-adaptive	27	Non-adaptive	28
Non-adaptive	29	Non-adaptive	17
Non-adaptive	28	Non-adaptive	19
Non-adaptive	25	Non-adaptive	22
Non-adaptive	42	Non-adaptive	25
Non-adaptive	16	Non-adaptive	16
Non-adaptive	33	Non-adaptive	30
Non-adaptive	21	Non-adaptive	22
Non-adaptive	32	Non-adaptive	24
Non-adaptive	41	Non-adaptive	17
Non-adaptive	20	Non-adaptive	19
Non-adaptive	24	Non-adaptive	22
Non-adaptive	25	Non-adaptive	29
Non-adaptive	31	Non-adaptive	21
Non-adaptive	25	Non-adaptive	14
Non-adaptive	36	Non-adaptive	16
Non-adaptive	16	Non-adaptive	23
Non-adaptive	40	Non-adaptive	17
Non-adaptive	22	Non-adaptive	28
Non-adaptive	28	Non-adaptive	22
Non-adaptive	37	Non-adaptive	16
Non-adaptive	30	Non-adaptive	27
Non-adaptive	27	Non-adaptive	26
Non-adaptive	32	Non-adaptive	19
Non-adaptive	35	Non-adaptive	27
Non-adaptive	27	Non-adaptive	23
Non-adaptive	39	Non-adaptive	30
Non-adaptive	22	Non-adaptive	22
Non-adaptive	30	Non-adaptive	18
Non-adaptive	31	Non-adaptive	26
Non-adaptive	36	Non-adaptive	23
Non-adaptive	35	Non-adaptive	17
Non-adaptive	27	Non-adaptive	24
Non-adaptive	35	Non-adaptive	25
Non-adaptive	26	Non-adaptive	22
Non-adaptive	39	Non-adaptive	23
Non-adaptive	29	Non-adaptive	26
Non-adaptive	28	Non-adaptive	13
Non-adaptive	21	Non-adaptive	30
Non-adaptive	23	Non-adaptive	23
Non-adaptive	22	Non-adaptive	23
Non-adaptive	34	Non-adaptive	30
Non-adaptive	36	Non-adaptive	27
Non-adaptive	27	Non-adaptive	23
Non-adaptive	27	Non-adaptive	19
Non-adaptive	35	Non-adaptive	26
Non-adaptive	41	Non-adaptive	11
Non-adaptive	31	Non-adaptive	25
Non-adaptive	28	Non-adaptive	19
Non-adaptive	28	Non-adaptive	24
Non-adaptive	24	Non-adaptive	20
Non-adaptive	23	Non-adaptive	29
Non-adaptive	29	Non-adaptive	22
Non-adaptive	26	Non-adaptive	16
Non-adaptive	16	Non-adaptive	23
Non-adaptive	31	Non-adaptive	21
Non-adaptive	23	Non-adaptive	27
Non-adaptive	32	Non-adaptive	12
Non-adaptive	26	Non-adaptive	16
Non-adaptive	17	Non-adaptive	21
Non-adaptive	32	Non-adaptive	22
Non-adaptive	24	Non-adaptive	22
Non-adaptive	32	Non-adaptive	20
Non-adaptive	35	Non-adaptive	21
Non-adaptive	15	Non-adaptive	24
Non-adaptive	23	Non-adaptive	29
Non-adaptive	30	Non-adaptive	26
Non-adaptive	21	Non-adaptive	16
Non-adaptive	35	Non-adaptive	21
Non-adaptive	25	Non-adaptive	19
Non-adaptive	38	Non-adaptive	21
Non-adaptive	30	Non-adaptive	23
Non-adaptive	26	Non-adaptive	29
Non-adaptive	37	Non-adaptive	24
Non-adaptive	28	Non-adaptive	17
Non-adaptive	26	Non-adaptive	25
Non-adaptive	28	Non-adaptive	20
Non-adaptive	28	Non-adaptive	26
Non-adaptive	22	Non-adaptive	23
Non-adaptive	22	Non-adaptive	30
Non-adaptive	39	Non-adaptive	22
Non-adaptive	30	Non-adaptive	20
Non-adaptive	24	Non-adaptive	17
Non-adaptive	30	Non-adaptive	20
Non-adaptive	33	Non-adaptive	20
Non-adaptive	26	Non-adaptive	19
Non-adaptive	20	Non-adaptive	24
Non-adaptive	29	Non-adaptive	24
Non-adaptive	29	Non-adaptive	25
Non-adaptive	24	Non-adaptive	22
Non-adaptive	29	Non-adaptive	23
Non-adaptive	30	Non-adaptive	17
Non-adaptive	38	Non-adaptive	16
Non-adaptive	29	Non-adaptive	22
Non-adaptive	28	Non-adaptive	22
Non-adaptive	27	Non-adaptive	22
Non-adaptive	26	Non-adaptive	20
Non-adaptive	42	Non-adaptive	24
Non-adaptive	33	Non-adaptive	19
Non-adaptive	37	Non-adaptive	20
Non-adaptive	44	Non-adaptive	29
Non-adaptive	25	Non-adaptive	29
Non-adaptive	27	Non-adaptive	17
Non-adaptive	34	Non-adaptive	25
Non-adaptive	27	Non-adaptive	24
Non-adaptive	26	Non-adaptive	20
Non-adaptive	32	Non-adaptive	28
Non-adaptive	32	Non-adaptive	23
Non-adaptive	30	Non-adaptive	12
Non-adaptive	25	Non-adaptive	23
Non-adaptive	24	Non-adaptive	23
Non-adaptive	29	Non-adaptive	14
Non-adaptive	30	Non-adaptive	15
Non-adaptive	26	Non-adaptive	23
Non-adaptive	34	Non-adaptive	27
Non-adaptive	28	Non-adaptive	23
Non-adaptive	25	Non-adaptive	25
Non-adaptive	38	Non-adaptive	25
Non-adaptive	30	Non-adaptive	22
Non-adaptive	26	Non-adaptive	26
Non-adaptive	28	Non-adaptive	15
Non-adaptive	32	Non-adaptive	21
Non-adaptive	30	Non-adaptive	25
Non-adaptive	27	Non-adaptive	23
Non-adaptive	29	Non-adaptive	18
Non-adaptive	25	Non-adaptive	17
Non-adaptive	30	Non-adaptive	27
Non-adaptive	27	Non-adaptive	22
Non-adaptive	26	Non-adaptive	23
Non-adaptive	24	Non-adaptive	23
Non-adaptive	37	Non-adaptive	20
Non-adaptive	19	Non-adaptive	17
Non-adaptive	33	Non-adaptive	19
Non-adaptive	25	Non-adaptive	21
Non-adaptive	25	Non-adaptive	26
Non-adaptive	26	Non-adaptive	24
Non-adaptive	36	Non-adaptive	22
Non-adaptive	34	Non-adaptive	30
Non-adaptive	34	Non-adaptive	22
Non-adaptive	28	Non-adaptive	22
Non-adaptive	32	Non-adaptive	25
Non-adaptive	31	Non-adaptive	15
Non-adaptive	35	Non-adaptive	18
Non-adaptive	36	Non-adaptive	27
Non-adaptive	29	Non-adaptive	24
Non-adaptive	26	Non-adaptive	27
Non-adaptive	38	Non-adaptive	17
Non-adaptive	28	Non-adaptive	25
Non-adaptive	25	Non-adaptive	27
Non-adaptive	29	Non-adaptive	19
Non-adaptive	33	Non-adaptive	22
Non-adaptive	33	Non-adaptive	24
Non-adaptive	32	Non-adaptive	22
Non-adaptive	28	Non-adaptive	17
Non-adaptive	25	Non-adaptive	22
Non-adaptive	32	Non-adaptive	19
Non-adaptive	29	Non-adaptive	29
Non-adaptive	26	Non-adaptive	34
Non-adaptive	32	Non-adaptive	30
Non-adaptive	25	Non-adaptive	24
Non-adaptive	33	Non-adaptive	20
Non-adaptive	18	Non-adaptive	14
Non-adaptive	27	Non-adaptive	21
Non-adaptive	33	Non-adaptive	24
Non-adaptive	26	Non-adaptive	18
Non-adaptive	34	Non-adaptive	24
Non-adaptive	34	Non-adaptive	25
Non-adaptive	30	Non-adaptive	22
Non-adaptive	29	Non-adaptive	27
Non-adaptive	38	Non-adaptive	25
Non-adaptive	36	Non-adaptive	28
Non-adaptive	27	Non-adaptive	26
Non-adaptive	29	Non-adaptive	27
Non-adaptive	28	Non-adaptive	29
Non-adaptive	32	Non-adaptive	26
Non-adaptive	19	Non-adaptive	29
Non-adaptive	24	Non-adaptive	23
Non-adaptive	26	Non-adaptive	17
Non-adaptive	21	Non-adaptive	23
Non-adaptive	31	Non-adaptive	21
Non-adaptive	26	Non-adaptive	25
Non-adaptive	23	Non-adaptive	24
Non-adaptive	30	Non-adaptive	21
Non-adaptive	28	Non-adaptive	23
Non-adaptive	30	Non-adaptive	21
Non-adaptive	28	Non-adaptive	34
Non-adaptive	24	Non-adaptive	21
Non-adaptive	38	Non-adaptive	23
Non-adaptive	33	Non-adaptive	24
Non-adaptive	28	Non-adaptive	25
Non-adaptive	34	Non-adaptive	25
Non-adaptive	22	Non-adaptive	26
Non-adaptive	31	Non-adaptive	20
Non-adaptive	17	Non-adaptive	14
Non-adaptive	35	Non-adaptive	21
Non-adaptive	34	Non-adaptive	25
Non-adaptive	19	Non-adaptive	31
Non-adaptive	28	Non-adaptive	23
Non-adaptive	27	Non-adaptive	14
Non-adaptive	29	Non-adaptive	25
Non-adaptive	24	Non-adaptive	25
Non-adaptive	25	Non-adaptive	36
Non-adaptive	21	Non-adaptive	28
Non-adaptive	29	Non-adaptive	18
Non-adaptive	32	Non-adaptive	24
Non-adaptive	32	Non-adaptive	29
Non-adaptive	24	Non-adaptive	27
Non-adaptive	27	Non-adaptive	27
Non-adaptive	27	Non-adaptive	24
Non-adaptive	31	Non-adaptive	27
Non-adaptive	27	Non-adaptive	34
Non-adaptive	35	Non-adaptive	28
Non-adaptive	30	Non-adaptive	24
Non-adaptive	30	Non-adaptive	19
Non-adaptive	28	Non-adaptive	26
Non-adaptive	26	Non-adaptive	25
Non-adaptive	15	Non-adaptive	22
Non-adaptive	31	Non-adaptive	20
Non-adaptive	26	Non-adaptive	25
Non-adaptive	31	Non-adaptive	15
Non-adaptive	31	Non-adaptive	23
Non-adaptive	31	Non-adaptive	20
Non-adaptive	20	Non-adaptive	24
Non-adaptive	30	Non-adaptive	20
Non-adaptive	27	Non-adaptive	25
Non-adaptive	23	Non-adaptive	27
Non-adaptive	32	Non-adaptive	20
Non-adaptive	27	Non-adaptive	23
Non-adaptive	31	Non-adaptive	28
Non-adaptive	32	Non-adaptive	21
Non-adaptive	25	Non-adaptive	19
Non-adaptive	33	Non-adaptive	31
Non-adaptive	27	Non-adaptive	21
Non-adaptive	29	Non-adaptive	18
Non-adaptive	35	Non-adaptive	24
Non-adaptive	31	Non-adaptive	23
Non-adaptive	21	Non-adaptive	23
Non-adaptive	23	Non-adaptive	28
Non-adaptive	31	Non-adaptive	23
Non-adaptive	27	Non-adaptive	27
Non-adaptive	33	Non-adaptive	26
Non-adaptive	31	Non-adaptive	24
Non-adaptive	26	Non-adaptive	22
Non-adaptive	36	Non-adaptive	22
Non-adaptive	31	Non-adaptive	25
Non-adaptive	29	Non-adaptive	21
Non-adaptive	31	Non-adaptive	26
Non-adaptive	19	Non-adaptive	18
Non-adaptive	33	Non-adaptive	17
Non-adaptive	23	Non-adaptive	24
Non-adaptive	35	Non-adaptive	19
Non-adaptive	24	Non-adaptive	21
Non-adaptive	31	Non-adaptive	25
Non-adaptive	23	Non-adaptive	19
Non-adaptive	37	Non-adaptive	20
Non-adaptive	30	Non-adaptive	28
Non-adaptive	22	Non-adaptive	20
Non-adaptive	31	Non-adaptive	25
Non-adaptive	24	Non-adaptive	21
Non-adaptive	27	Non-adaptive	18
Non-adaptive	31	Non-adaptive	23
Non-adaptive	34	Non-adaptive	18
Non-adaptive	33	Non-adaptive	28
Non-adaptive	37	Non-adaptive	23
Non-adaptive	26	Non-adaptive	22
Non-adaptive	22	Non-adaptive	18
Non-adaptive	20	Non-adaptive	17
Non-adaptive	23	Non-adaptive	27
Non-adaptive	37	Non-adaptive	28
Non-adaptive	28	Non-adaptive	26
Non-adaptive	23	Non-adaptive	21
Non-adaptive	27	Non-adaptive	24
Non-adaptive	22	Non-adaptive	33
Non-adaptive	23	Non-adaptive	16
Non-adaptive	21	Non-adaptive	21
Non-adaptive	33	Non-adaptive	21
Non-adaptive	26	Non-adaptive	30
Non-adaptive	29	Non-adaptive	18
Non-adaptive	34	Non-adaptive	16
Non-adaptive	24	Non-adaptive	28
Non-adaptive	27	Non-adaptive	24
Non-adaptive	31	Non-adaptive	21
Non-adaptive	27	Non-adaptive	23
Non-adaptive	20	Non-adaptive	20
Non-adaptive	30	Non-adaptive	22
Non-adaptive	32	Non-adaptive	31
Non-adaptive	32	Non-adaptive	19
Non-adaptive	29	Non-adaptive	29
Non-adaptive	28	Non-adaptive	26
Non-adaptive	24	Non-adaptive	23
Non-adaptive	25	Non-adaptive	19
Non-adaptive	27	Non-adaptive	26
Non-adaptive	22	Non-adaptive	22
Non-adaptive	28	Non-adaptive	24
Non-adaptive	22	Non-adaptive	22
Non-adaptive	28	Non-adaptive	22
Non-adaptive	27	Non-adaptive	24
Non-adaptive	31	Non-adaptive	29
Non-adaptive	38	Non-adaptive	14
Non-adaptive	31	Non-adaptive	22
Non-adaptive	25	Non-adaptive	21
Non-adaptive	24	Non-adaptive	39
Non-adaptive	22	Non-adaptive	21
Non-adaptive	35	Non-adaptive	23
Non-adaptive	29	Non-adaptive	25
Non-adaptive	28	Non-adaptive	24
Non-adaptive	25	Non-adaptive	23
Non-adaptive	37	Non-adaptive	22
Non-adaptive	27	Non-adaptive	25
Non-adaptive	32	Non-adaptive	23
Non-adaptive	31	Non-adaptive	18
Non-adaptive	27	Non-adaptive	19
Non-adaptive	24	Non-adaptive	27
Non-adaptive	30	Non-adaptive	24
Non-adaptive	33	Non-adaptive	20
Non-adaptive	28	Non-adaptive	29
Non-adaptive	27	Non-adaptive	16
Non-adaptive	28	Non-adaptive	25
Non-adaptive	26	Non-adaptive	22
Non-adaptive	36	Non-adaptive	29
Non-adaptive	34	Non-adaptive	25
Non-adaptive	43	Non-adaptive	24
Non-adaptive	31	Non-adaptive	30
Non-adaptive	35	Non-adaptive	20
Non-adaptive	23	Non-adaptive	15
Non-adaptive	26	Non-adaptive	16
Non-adaptive	31	Non-adaptive	19
Non-adaptive	31	Non-adaptive	27
Non-adaptive	20	Non-adaptive	25
Non-adaptive	27	Non-adaptive	27
Non-adaptive	31	Non-adaptive	19
Non-adaptive	25	Non-adaptive	22
Non-adaptive	18	Non-adaptive	30
Non-adaptive	30	Non-adaptive	28
Non-adaptive	28	Non-adaptive	23
Non-adaptive	31	Non-adaptive	23
Non-adaptive	20	Non-adaptive	24
Non-adaptive	26	Non-adaptive	23
Non-adaptive	27	Non-adaptive	18
Non-adaptive	27	Non-adaptive	35
Non-adaptive	24	Non-adaptive	15
Non-adaptive	26	Non-adaptive	24
Non-adaptive	32	Non-adaptive	27
Non-adaptive	35	Non-adaptive	26
Non-adaptive	37	Non-adaptive	28
Non-adaptive	25	Non-adaptive	26
Non-adaptive	28	Non-adaptive	23
Non-adaptive	21	Non-adaptive	24
Non-adaptive	35	Non-adaptive	12
Non-adaptive	38	Non-adaptive	19
Non-adaptive	35	Non-adaptive	26
Non-adaptive	28	Non-adaptive	33
Non-adaptive	28	Non-adaptive	30
Non-adaptive	28	Non-adaptive	21
Non-adaptive	26	Non-adaptive	23
Non-adaptive	29	Non-adaptive	28
Non-adaptive	30	Non-adaptive	28
Non-adaptive	24	Non-adaptive	20
Non-adaptive	29	Non-adaptive	19
Non-adaptive	20	Non-adaptive	32
Non-adaptive	31	Non-adaptive	28
Non-adaptive	37	Non-adaptive	21
Non-adaptive	30	Non-adaptive	23
Non-adaptive	18	Non-adaptive	14
Non-adaptive	39	Non-adaptive	29
Non-adaptive	29	Non-adaptive	26
Non-adaptive	31	Non-adaptive	26
Non-adaptive	26	Non-adaptive	24
Non-adaptive	22	Non-adaptive	21
Non-adaptive	32	Non-adaptive	25
Non-adaptive	25	Non-adaptive	17
Non-adaptive	26	Non-adaptive	23
Non-adaptive	32	Non-adaptive	27
Non-adaptive	26	Non-adaptive	21
Non-adaptive	33	Non-adaptive	24
Non-adaptive	30	Non-adaptive	18
Non-adaptive	29	Non-adaptive	22
Non-adaptive	36	Non-adaptive	21
Non-adaptive	26	Non-adaptive	27
Non-adaptive	33	Non-adaptive	18
Non-adaptive	39	Non-adaptive	24
Non-adaptive	23	Non-adaptive	22
Non-adaptive	23	Non-adaptive	25
Non-adaptive	26	Non-adaptive	16
Non-adaptive	34	Non-adaptive	26
Non-adaptive	26	Non-adaptive	24
Non-adaptive	28	Non-adaptive	23
Non-adaptive	24	Non-adaptive	35
Non-adaptive	32	Non-adaptive	31
Non-adaptive	36	Non-adaptive	25
Non-adaptive	27	Non-adaptive	23
Non-adaptive	30	Non-adaptive	24
Non-adaptive	19	Non-adaptive	22
Non-adaptive	30	Non-adaptive	21
Non-adaptive	26	Non-adaptive	22
Non-adaptive	26	Non-adaptive	34
Non-adaptive	32	Non-adaptive	25
Non-adaptive	25	Non-adaptive	25
Non-adaptive	33	Non-adaptive	27
Non-adaptive	37	Non-adaptive	32
Non-adaptive	19	Non-adaptive	30
Non-adaptive	27	Non-adaptive	19
Non-adaptive	32	Non-adaptive	25
Non-adaptive	29	Non-adaptive	24
Non-adaptive	24	Non-adaptive	21
Non-adaptive	30	Non-adaptive	24
Non-adaptive	36	Non-adaptive	26
Non-adaptive	26	Non-adaptive	21
Non-adaptive	29	Non-adaptive	17
Non-adaptive	25	Non-adaptive	29
Non-adaptive	23	Non-adaptive	19
Non-adaptive	23	Non-adaptive	20
Non-adaptive	22	Non-adaptive	20
Non-adaptive	27	Non-adaptive	18
Non-adaptive	31	Non-adaptive	25
Non-adaptive	32	Non-adaptive	25
Non-adaptive	33	Non-adaptive	25
Non-adaptive	29	Non-adaptive	29
Non-adaptive	24	Non-adaptive	33
Non-adaptive	26	Non-adaptive	26
Non-adaptive	32	Non-adaptive	13
Non-adaptive	24	Non-adaptive	23
Non-adaptive	21	Non-adaptive	13
Non-adaptive	23	Non-adaptive	13
Non-adaptive	40	Non-adaptive	21
Non-adaptive	31	Non-adaptive	15
Non-adaptive	29	Non-adaptive	31
Non-adaptive	31	Non-adaptive	23
Non-adaptive	43	Non-adaptive	24
Non-adaptive	23	Non-adaptive	18
Non-adaptive	22	Non-adaptive	21
Non-adaptive	34	Non-adaptive	21
Non-adaptive	25	Non-adaptive	20
Non-adaptive	36	Non-adaptive	22
Non-adaptive	26	Non-adaptive	28
Non-adaptive	25	Non-adaptive	16
Non-adaptive	23	Non-adaptive	24
Non-adaptive	25	Non-adaptive	19
Non-adaptive	25	Non-adaptive	25
Non-adaptive	30	Non-adaptive	23
Non-adaptive	25	Non-adaptive	23
Non-adaptive	27	Non-adaptive	25
Non-adaptive	21	Non-adaptive	25
Non-adaptive	36	Non-adaptive	28
Non-adaptive	34	Non-adaptive	30
Non-adaptive	31	Non-adaptive	16
Non-adaptive	27	Non-adaptive	30
Non-adaptive	25	Non-adaptive	20
Non-adaptive	34	Non-adaptive	31
Non-adaptive	26	Non-adaptive	24
[truncated: 8,002 more rows]
