# Supplementary material for: Domestication and lowland adaptation of coastal preceramic maize from Paredones, Peru
Source: eLife. 2023 Apr 18;12:e83149. doi: 10.7554/eLife.83149 (PMC10112886; doi:10.7554/eLife.83149)
Supplement: Figure 5—source data 1. — Figure 5A: Allelic similarity between Par_N16 and SNPs with significant FST implicated as adaptive to Mesoamerican highland landraces. Adaptive, from a list of 668 adaptive SNPs; Non-adaptive, from random lists of 32 non-adaptive SNPs. Figure 5B: Allelic similarity between Par_N16 and SNPs with significant FST implicated as adaptive to Mesoamerican lowland landraces. Adaptive, from a list of 668 adaptive SNPs; Non-adaptive, from random lists of 32 non-adaptive SNPs. Figure 5C: Allelic similarity between Par_N16 and SNPs with significant FST implicated as adaptive to South American highland landraces. Adaptive, from a list of 390 adaptive SNPs; Non-adaptive, from random lists of 20 non-adaptive SNPs. Figure 5D: Allelic similarity between Par_N16 and SNPs with significant FST implicated as adaptive to South American lowland landraces. Adaptive, from a list of 390 adaptive SNPs; Non-adaptive, from random lists of 20 non-adaptive SNPs. [file elife-83149-fig5-data1.xlsx]

## Sheet: Figure 5A
Figure 5A. Allelic similarity between Par_N16 and SNPs with significant FST implicated as adaptive to Mesoamerican highland landraces. Adaptive, from a list of 668 adaptive SNPs; Non-adaptive, from random lists of 32 non adaptive SNPs.
Group	Proportion
Adaptive	0.49954
Non-adaptive	0.778502
Non-adaptive	0.685261
Non-adaptive	0.79967
Non-adaptive	0.749265
Non-adaptive	0.869817
Non-adaptive	0.810316
Non-adaptive	0.756941
Non-adaptive	0.824203
Non-adaptive	0.791841
Non-adaptive	0.785424
Non-adaptive	0.77326
Non-adaptive	0.764278
Non-adaptive	0.797324
Non-adaptive	0.813869
Non-adaptive	0.780952
Non-adaptive	0.80018
Non-adaptive	0.820162
Non-adaptive	0.895345
Non-adaptive	0.753942
Non-adaptive	0.65908
Non-adaptive	0.78398
Non-adaptive	0.749644
Non-adaptive	0.851625
Non-adaptive	0.69845
Non-adaptive	0.805447
Non-adaptive	0.709442
Non-adaptive	0.69925
Non-adaptive	0.871968
Non-adaptive	0.847137
Non-adaptive	0.879598
Non-adaptive	0.809977
Non-adaptive	0.804366
Non-adaptive	0.80168
Non-adaptive	0.723332
Non-adaptive	0.752227
Non-adaptive	0.726324
Non-adaptive	0.782729
Non-adaptive	0.751254
Non-adaptive	0.795296
Non-adaptive	0.767118
Non-adaptive	0.790111
Non-adaptive	0.7855
Non-adaptive	0.829259
Non-adaptive	0.697965
Non-adaptive	0.786434
Non-adaptive	0.733121
Non-adaptive	0.730539
Non-adaptive	0.685426
Non-adaptive	0.801266
Non-adaptive	0.704096
Non-adaptive	0.740961
Non-adaptive	0.788772
Non-adaptive	0.790123
Non-adaptive	0.681234
Non-adaptive	0.808927
Non-adaptive	0.776066
Non-adaptive	0.854262
Non-adaptive	0.77628
Non-adaptive	0.729644
Non-adaptive	0.765333
Non-adaptive	0.767127
Non-adaptive	0.768364
Non-adaptive	0.823608
Non-adaptive	0.798853
Non-adaptive	0.843993
Non-adaptive	0.802228
Non-adaptive	0.734036
Non-adaptive	0.75429
Non-adaptive	0.790931
Non-adaptive	0.822692
Non-adaptive	0.774808
Non-adaptive	0.853791
Non-adaptive	0.780798
Non-adaptive	0.816549
Non-adaptive	0.828906
Non-adaptive	0.772051
Non-adaptive	0.768752
Non-adaptive	0.752698
Non-adaptive	0.784288
Non-adaptive	0.801312
Non-adaptive	0.733387
Non-adaptive	0.735907
Non-adaptive	0.816105
Non-adaptive	0.802686
Non-adaptive	0.743735
Non-adaptive	0.813016
Non-adaptive	0.740617
Non-adaptive	0.772382
Non-adaptive	0.830243
Non-adaptive	0.836664
Non-adaptive	0.778449
Non-adaptive	0.81008
Non-adaptive	0.76634
Non-adaptive	0.715222
Non-adaptive	0.768877
Non-adaptive	0.797575
Non-adaptive	0.73586
Non-adaptive	0.84307
Non-adaptive	0.752253
Non-adaptive	0.739785
Non-adaptive	0.709882
Non-adaptive	0.733434
Non-adaptive	0.891116
Non-adaptive	0.803796
Non-adaptive	0.730895
Non-adaptive	0.780791
Non-adaptive	0.79545
Non-adaptive	0.806888
Non-adaptive	0.820025
Non-adaptive	0.848311
Non-adaptive	0.773387
Non-adaptive	0.769598
Non-adaptive	0.842291
Non-adaptive	0.720051
Non-adaptive	0.816667
Non-adaptive	0.834401
Non-adaptive	0.815067
Non-adaptive	0.832332
Non-adaptive	0.813368
Non-adaptive	0.815085
Non-adaptive	0.776525
Non-adaptive	0.768269
Non-adaptive	0.7903
Non-adaptive	0.806363
Non-adaptive	0.863041
Non-adaptive	0.791701
Non-adaptive	0.702766
Non-adaptive	0.795217
Non-adaptive	0.772816
Non-adaptive	0.762491
Non-adaptive	0.836721
Non-adaptive	0.830249
Non-adaptive	0.681631
Non-adaptive	0.766801
Non-adaptive	0.770181
Non-adaptive	0.773547
Non-adaptive	0.754539
Non-adaptive	0.769675
Non-adaptive	0.748339
Non-adaptive	0.769024
Non-adaptive	0.740707
Non-adaptive	0.788082
Non-adaptive	0.730959
Non-adaptive	0.780416
Non-adaptive	0.75849
Non-adaptive	0.751177
Non-adaptive	0.768915
Non-adaptive	0.796758
Non-adaptive	0.751939
Non-adaptive	0.683413
Non-adaptive	0.823945
Non-adaptive	0.700715
Non-adaptive	0.730012
Non-adaptive	0.790019
Non-adaptive	0.741692
Non-adaptive	0.849117
Non-adaptive	0.715163
Non-adaptive	0.792577
Non-adaptive	0.832385
Non-adaptive	0.884207
Non-adaptive	0.74664
Non-adaptive	0.798024
Non-adaptive	0.690306
Non-adaptive	0.832935
Non-adaptive	0.824352
Non-adaptive	0.799523
Non-adaptive	0.855501
Non-adaptive	0.850881
Non-adaptive	0.866831
Non-adaptive	0.83554
Non-adaptive	0.863069
Non-adaptive	0.843063
Non-adaptive	0.728099
Non-adaptive	0.833472
Non-adaptive	0.7883
Non-adaptive	0.781518
Non-adaptive	0.838633
Non-adaptive	0.733256
Non-adaptive	0.796117
Non-adaptive	0.773041
Non-adaptive	0.746558
Non-adaptive	0.765514
Non-adaptive	0.792921
Non-adaptive	0.758474
Non-adaptive	0.819203
Non-adaptive	0.880574
Non-adaptive	0.758023
Non-adaptive	0.781103
Non-adaptive	0.755129
Non-adaptive	0.810889
Non-adaptive	0.727509
Non-adaptive	0.8036
Non-adaptive	0.816506
Non-adaptive	0.736612
Non-adaptive	0.759919
Non-adaptive	0.79029
Non-adaptive	0.735156
Non-adaptive	0.708094
Non-adaptive	0.768924
Non-adaptive	0.817281
Non-adaptive	0.707923
Non-adaptive	0.796863
Non-adaptive	0.780187
Non-adaptive	0.836447
Non-adaptive	0.761733
Non-adaptive	0.690962
Non-adaptive	0.762919
Non-adaptive	0.716615
Non-adaptive	0.790625
Non-adaptive	0.692262
Non-adaptive	0.804613
Non-adaptive	0.7472
Non-adaptive	0.852576
Non-adaptive	0.790686
Non-adaptive	0.812312
Non-adaptive	0.756218
Non-adaptive	0.902399
Non-adaptive	0.785965
Non-adaptive	0.793331
Non-adaptive	0.810977
Non-adaptive	0.781928
Non-adaptive	0.789795
Non-adaptive	0.823707
Non-adaptive	0.762093
Non-adaptive	0.725284
Non-adaptive	0.754623
Non-adaptive	0.816256
Non-adaptive	0.831157
Non-adaptive	0.817374
Non-adaptive	0.796855
Non-adaptive	0.766804
Non-adaptive	0.811384
Non-adaptive	0.802518
Non-adaptive	0.8332
Non-adaptive	0.868882
Non-adaptive	0.730749
Non-adaptive	0.716016
Non-adaptive	0.798986
Non-adaptive	0.814819
Non-adaptive	0.836953
Non-adaptive	0.849485
Non-adaptive	0.77033
Non-adaptive	0.818708
Non-adaptive	0.795332
Non-adaptive	0.774967
Non-adaptive	0.804295
Non-adaptive	0.835607
Non-adaptive	0.673815
Non-adaptive	0.77496
Non-adaptive	0.810985
Non-adaptive	0.773866
Non-adaptive	0.793368
Non-adaptive	0.728557
Non-adaptive	0.770315
Non-adaptive	0.89211
Non-adaptive	0.820633
Non-adaptive	0.82835
Non-adaptive	0.766605
Non-adaptive	0.81178
Non-adaptive	0.821733
Non-adaptive	0.769848
Non-adaptive	0.742706
Non-adaptive	0.844212
Non-adaptive	0.837289
Non-adaptive	0.777846
Non-adaptive	0.783051
Non-adaptive	0.811782
Non-adaptive	0.787375
Non-adaptive	0.778381
Non-adaptive	0.839345
Non-adaptive	0.851359
Non-adaptive	0.860566
Non-adaptive	0.762069
Non-adaptive	0.729394
Non-adaptive	0.734152
Non-adaptive	0.852026
Non-adaptive	0.770322
Non-adaptive	0.678657
Non-adaptive	0.773766
Non-adaptive	0.755916
Non-adaptive	0.750665
Non-adaptive	0.826388
Non-adaptive	0.78109
Non-adaptive	0.70947
Non-adaptive	0.811612
Non-adaptive	0.805393
Non-adaptive	0.794637
Non-adaptive	0.740726
Non-adaptive	0.769171
Non-adaptive	0.776724
Non-adaptive	0.665065
Non-adaptive	0.777735
Non-adaptive	0.724773
Non-adaptive	0.793691
Non-adaptive	0.714244
Non-adaptive	0.779677
Non-adaptive	0.735529
Non-adaptive	0.776678
Non-adaptive	0.713775
Non-adaptive	0.843407
Non-adaptive	0.756882
Non-adaptive	0.795628
Non-adaptive	0.77553
Non-adaptive	0.845241
Non-adaptive	0.746696
Non-adaptive	0.810345
Non-adaptive	0.758065
Non-adaptive	0.8325
Non-adaptive	0.775366
Non-adaptive	0.877426
Non-adaptive	0.835039
Non-adaptive	0.866708
Non-adaptive	0.677036
Non-adaptive	0.783557
Non-adaptive	0.716046
Non-adaptive	0.794036
Non-adaptive	0.783939
Non-adaptive	0.745254
Non-adaptive	0.759362
Non-adaptive	0.772056
Non-adaptive	0.731308
Non-adaptive	0.765449
Non-adaptive	0.821959
Non-adaptive	0.702825
Non-adaptive	0.688443
Non-adaptive	0.838793
Non-adaptive	0.804106
Non-adaptive	0.807336
Non-adaptive	0.800727
Non-adaptive	0.76445
Non-adaptive	0.807299
Non-adaptive	0.811786
Non-adaptive	0.735385
Non-adaptive	0.802491
Non-adaptive	0.793719
Non-adaptive	0.81198
Non-adaptive	0.822481
Non-adaptive	0.787446
Non-adaptive	0.711064
Non-adaptive	0.814302
Non-adaptive	0.843889
Non-adaptive	0.844135
Non-adaptive	0.859632
Non-adaptive	0.846237
Non-adaptive	0.810062
Non-adaptive	0.746615
Non-adaptive	0.807484
Non-adaptive	0.696543
Non-adaptive	0.830991
Non-adaptive	0.777371
Non-adaptive	0.77491
Non-adaptive	0.791431
Non-adaptive	0.817113
Non-adaptive	0.778804
Non-adaptive	0.773681
Non-adaptive	0.813929
Non-adaptive	0.838488
Non-adaptive	0.784049
Non-adaptive	0.762116
Non-adaptive	0.732955
Non-adaptive	0.797112
Non-adaptive	0.75056
Non-adaptive	0.777457
Non-adaptive	0.77735
Non-adaptive	0.7747
Non-adaptive	0.84895
Non-adaptive	0.847863
Non-adaptive	0.751811
Non-adaptive	0.848077
Non-adaptive	0.781585
Non-adaptive	0.778605
Non-adaptive	0.72298
Non-adaptive	0.79029
Non-adaptive	0.767195
Non-adaptive	0.73814
Non-adaptive	0.773038
Non-adaptive	0.805736
Non-adaptive	0.786902
Non-adaptive	0.742634
Non-adaptive	0.710763
Non-adaptive	0.832565
Non-adaptive	0.830992
Non-adaptive	0.824491
Non-adaptive	0.754514
Non-adaptive	0.764305
Non-adaptive	0.819501
Non-adaptive	0.787223
Non-adaptive	0.892691
Non-adaptive	0.836855
Non-adaptive	0.710593
Non-adaptive	0.791336
Non-adaptive	0.795393
Non-adaptive	0.763575
Non-adaptive	0.776799
Non-adaptive	0.771755
Non-adaptive	0.788655
Non-adaptive	0.770765
Non-adaptive	0.794121
Non-adaptive	0.740959
Non-adaptive	0.725751
Non-adaptive	0.808813
Non-adaptive	0.78282
Non-adaptive	0.742315
Non-adaptive	0.780392
Non-adaptive	0.725044
Non-adaptive	0.783907
Non-adaptive	0.840439
Non-adaptive	0.79613
Non-adaptive	0.779284
Non-adaptive	0.845953
Non-adaptive	0.78473
Non-adaptive	0.80223
Non-adaptive	0.735016
Non-adaptive	0.763639
Non-adaptive	0.82926
Non-adaptive	0.770414
Non-adaptive	0.802936
Non-adaptive	0.796523
Non-adaptive	0.71409
Non-adaptive	0.74628
Non-adaptive	0.827382
Non-adaptive	0.792095
Non-adaptive	0.830007
Non-adaptive	0.808178
Non-adaptive	0.80407
Non-adaptive	0.8507
Non-adaptive	0.818786
Non-adaptive	0.790129
Non-adaptive	0.820865
Non-adaptive	0.798078
Non-adaptive	0.876144
Non-adaptive	0.839401
Non-adaptive	0.781882
Non-adaptive	0.788861
Non-adaptive	0.783401
Non-adaptive	0.726045
Non-adaptive	0.760792
Non-adaptive	0.752157
Non-adaptive	0.73136
Non-adaptive	0.826658
Non-adaptive	0.825943
Non-adaptive	0.811558
Non-adaptive	0.70761
Non-adaptive	0.838018
Non-adaptive	0.748886
Non-adaptive	0.796086
Non-adaptive	0.729506
Non-adaptive	0.861299
Non-adaptive	0.818853
Non-adaptive	0.736786
Non-adaptive	0.813017
Non-adaptive	0.763784
Non-adaptive	0.858628
Non-adaptive	0.748414
Non-adaptive	0.745353
Non-adaptive	0.775304
Non-adaptive	0.74282
Non-adaptive	0.78891
Non-adaptive	0.806993
Non-adaptive	0.751589
Non-adaptive	0.809883
Non-adaptive	0.759549
Non-adaptive	0.776122
Non-adaptive	0.711901
Non-adaptive	0.779134
Non-adaptive	0.780456
Non-adaptive	0.80297
Non-adaptive	0.740963
Non-adaptive	0.869559
Non-adaptive	0.853127
Non-adaptive	0.75425
Non-adaptive	0.815689
Non-adaptive	0.764145
Non-adaptive	0.766
Non-adaptive	0.757639
Non-adaptive	0.677924
Non-adaptive	0.825542
Non-adaptive	0.808659
Non-adaptive	0.831426
Non-adaptive	0.781571
Non-adaptive	0.626418
Non-adaptive	0.768512
Non-adaptive	0.790161
Non-adaptive	0.734224
Non-adaptive	0.770649
Non-adaptive	0.732863
Non-adaptive	0.68812
Non-adaptive	0.745458
Non-adaptive	0.705655
Non-adaptive	0.722246
Non-adaptive	0.828469
Non-adaptive	0.824729
Non-adaptive	0.767012
Non-adaptive	0.708369
Non-adaptive	0.843924
Non-adaptive	0.749137
Non-adaptive	0.751521
Non-adaptive	0.712467
Non-adaptive	0.792091
Non-adaptive	0.849374
Non-adaptive	0.759295
Non-adaptive	0.731075
Non-adaptive	0.794391
Non-adaptive	0.792181
Non-adaptive	0.843277
Non-adaptive	0.821718
Non-adaptive	0.79596
Non-adaptive	0.766178
Non-adaptive	0.686333
Non-adaptive	0.85866
Non-adaptive	0.819383
Non-adaptive	0.837792
Non-adaptive	0.797762
Non-adaptive	0.817514
Non-adaptive	0.831245
Non-adaptive	0.672855
Non-adaptive	0.699523
Non-adaptive	0.79386
Non-adaptive	0.793147
Non-adaptive	0.692216
Non-adaptive	0.827665
Non-adaptive	0.690198
Non-adaptive	0.767382
Non-adaptive	0.859958
Non-adaptive	0.767635
Non-adaptive	0.837821
Non-adaptive	0.820616
Non-adaptive	0.808053
Non-adaptive	0.778173
Non-adaptive	0.846338
Non-adaptive	0.776551
Non-adaptive	0.791498
Non-adaptive	0.72347
Non-adaptive	0.88514
Non-adaptive	0.708743
Non-adaptive	0.814491
Non-adaptive	0.844659
Non-adaptive	0.856924
Non-adaptive	0.767542
Non-adaptive	0.764932
Non-adaptive	0.751672
Non-adaptive	0.758201
Non-adaptive	0.810231
Non-adaptive	0.832899
Non-adaptive	0.751928
Non-adaptive	0.672159
Non-adaptive	0.836143
Non-adaptive	0.79857
Non-adaptive	0.7942
Non-adaptive	0.722213
Non-adaptive	0.797573
Non-adaptive	0.802245
Non-adaptive	0.78462
Non-adaptive	0.740839
Non-adaptive	0.803726
Non-adaptive	0.771472
Non-adaptive	0.848425
Non-adaptive	0.751469
Non-adaptive	0.845775
Non-adaptive	0.791598
Non-adaptive	0.8321
Non-adaptive	0.812505
Non-adaptive	0.769051
Non-adaptive	0.753029
Non-adaptive	0.864634
Non-adaptive	0.833089
Non-adaptive	0.794912
Non-adaptive	0.827829
Non-adaptive	0.78404
Non-adaptive	0.824736
Non-adaptive	0.796429
Non-adaptive	0.788129
Non-adaptive	0.80111
Non-adaptive	0.801595
Non-adaptive	0.775754
Non-adaptive	0.774577
Non-adaptive	0.859734
Non-adaptive	0.768824
Non-adaptive	0.700157
Non-adaptive	0.812189
Non-adaptive	0.729878
Non-adaptive	0.804198
Non-adaptive	0.863329
Non-adaptive	0.745007
Non-adaptive	0.802703
Non-adaptive	0.77277
Non-adaptive	0.712738
Non-adaptive	0.810424
Non-adaptive	0.782443
Non-adaptive	0.794367
Non-adaptive	0.857696
Non-adaptive	0.713371
Non-adaptive	0.847294
Non-adaptive	0.723435
Non-adaptive	0.822151
Non-adaptive	0.763689
Non-adaptive	0.726626
Non-adaptive	0.785105
Non-adaptive	0.819316
Non-adaptive	0.852171
Non-adaptive	0.816327
Non-adaptive	0.788166
Non-adaptive	0.756982
Non-adaptive	0.669361
Non-adaptive	0.832919
Non-adaptive	0.772847
Non-adaptive	0.7824
Non-adaptive	0.7929
Non-adaptive	0.77657
Non-adaptive	0.827278
Non-adaptive	0.736464
Non-adaptive	0.736627
Non-adaptive	0.767629
Non-adaptive	0.756159
Non-adaptive	0.833343
Non-adaptive	0.832018
Non-adaptive	0.763678
Non-adaptive	0.679762
Non-adaptive	0.800628
Non-adaptive	0.766466
Non-adaptive	0.84573
Non-adaptive	0.795394
Non-adaptive	0.862723
Non-adaptive	0.716751
Non-adaptive	0.791825
Non-adaptive	0.799751
Non-adaptive	0.820924
Non-adaptive	0.843636
Non-adaptive	0.831112
Non-adaptive	0.81385
Non-adaptive	0.800579
Non-adaptive	0.79312
Non-adaptive	0.801992
Non-adaptive	0.771297
Non-adaptive	0.731707
Non-adaptive	0.827172
Non-adaptive	0.845262
Non-adaptive	0.800088
Non-adaptive	0.671415
Non-adaptive	0.733956
Non-adaptive	0.804838
Non-adaptive	0.719201
Non-adaptive	0.67765
Non-adaptive	0.852562
Non-adaptive	0.838971
Non-adaptive	0.816501
Non-adaptive	0.756293
Non-adaptive	0.639943
Non-adaptive	0.765062
Non-adaptive	0.746491
Non-adaptive	0.864245
Non-adaptive	0.759538
Non-adaptive	0.812106
Non-adaptive	0.808746
Non-adaptive	0.823873
Non-adaptive	0.785788
Non-adaptive	0.79664
Non-adaptive	0.752063
Non-adaptive	0.803836
Non-adaptive	0.67368
Non-adaptive	0.671323
Non-adaptive	0.695708
Non-adaptive	0.75944
Non-adaptive	0.70871
Non-adaptive	0.757544
Non-adaptive	0.705242
Non-adaptive	0.728521
Non-adaptive	0.792876
Non-adaptive	0.780711
Non-adaptive	0.701873
Non-adaptive	0.805713
Non-adaptive	0.826152
Non-adaptive	0.813287
Non-adaptive	0.657199
Non-adaptive	0.730745
Non-adaptive	0.717315
Non-adaptive	0.787646
Non-adaptive	0.766256
Non-adaptive	0.751831
Non-adaptive	0.770173
Non-adaptive	0.712647
Non-adaptive	0.807322
Non-adaptive	0.805614
Non-adaptive	0.791716
Non-adaptive	0.737448
Non-adaptive	0.757779
Non-adaptive	0.779286
Non-adaptive	0.758891
Non-adaptive	0.779003
Non-adaptive	0.783181
Non-adaptive	0.806204
Non-adaptive	0.744405
Non-adaptive	0.81526
Non-adaptive	0.802636
Non-adaptive	0.739597
Non-adaptive	0.781156
Non-adaptive	0.762455
Non-adaptive	0.78096
Non-adaptive	0.879772
Non-adaptive	0.74014
Non-adaptive	0.730749
Non-adaptive	0.837969
Non-adaptive	0.862091
Non-adaptive	0.754049
Non-adaptive	0.759057
Non-adaptive	0.686936
Non-adaptive	0.8588
Non-adaptive	0.800548
Non-adaptive	0.758817
Non-adaptive	0.798976
Non-adaptive	0.755574
Non-adaptive	0.774575
Non-adaptive	0.789732
Non-adaptive	0.788718
Non-adaptive	0.774212
Non-adaptive	0.804495
Non-adaptive	0.723178
Non-adaptive	0.809993
Non-adaptive	0.76592
Non-adaptive	0.821149
Non-adaptive	0.841879
Non-adaptive	0.815529
Non-adaptive	0.780171
Non-adaptive	0.801449
Non-adaptive	0.703638
Non-adaptive	0.746699
Non-adaptive	0.781095
Non-adaptive	0.852401
Non-adaptive	0.68364
Non-adaptive	0.817994
Non-adaptive	0.796432
Non-adaptive	0.800597
Non-adaptive	0.835476
Non-adaptive	0.815699
Non-adaptive	0.800772
Non-adaptive	0.778437
Non-adaptive	0.842676
Non-adaptive	0.788086
Non-adaptive	0.826903
Non-adaptive	0.814503
Non-adaptive	0.751043
Non-adaptive	0.909521
Non-adaptive	0.822509
Non-adaptive	0.868184
Non-adaptive	0.73993
Non-adaptive	0.771828
Non-adaptive	0.856692
Non-adaptive	0.707527
Non-adaptive	0.743569
Non-adaptive	0.795554
Non-adaptive	0.723982
Non-adaptive	0.688791
Non-adaptive	0.812953
Non-adaptive	0.760852
Non-adaptive	0.825191
Non-adaptive	0.774408
Non-adaptive	0.825361
Non-adaptive	0.676425
Non-adaptive	0.774627
Non-adaptive	0.623198
Non-adaptive	0.731805
Non-adaptive	0.811782
Non-adaptive	0.797772
Non-adaptive	0.745039
Non-adaptive	0.683896
Non-adaptive	0.678371
Non-adaptive	0.783891
Non-adaptive	0.786714
Non-adaptive	0.84792
Non-adaptive	0.846658
Non-adaptive	0.845344
Non-adaptive	0.855482
Non-adaptive	0.780154
Non-adaptive	0.771423
Non-adaptive	0.786013
Non-adaptive	0.769276
Non-adaptive	0.767717
Non-adaptive	0.788626
Non-adaptive	0.777998
Non-adaptive	0.77692
Non-adaptive	0.811065
Non-adaptive	0.870663
Non-adaptive	0.731961
Non-adaptive	0.762925
Non-adaptive	0.721757
Non-adaptive	0.729687
Non-adaptive	0.749294
Non-adaptive	0.788529
Non-adaptive	0.816273
Non-adaptive	0.809046
Non-adaptive	0.782598
Non-adaptive	0.754963
Non-adaptive	0.785664
Non-adaptive	0.741128
Non-adaptive	0.737652
Non-adaptive	0.760201
Non-adaptive	0.81001
Non-adaptive	0.795909
Non-adaptive	0.837397
Non-adaptive	0.75531
Non-adaptive	0.704255
Non-adaptive	0.770895
Non-adaptive	0.775685
Non-adaptive	0.737272
Non-adaptive	0.826593
Non-adaptive	0.799231
Non-adaptive	0.772419
Non-adaptive	0.811764
Non-adaptive	0.851789
Non-adaptive	0.815094
Non-adaptive	0.842639
Non-adaptive	0.798339
Non-adaptive	0.702845
Non-adaptive	0.70593
Non-adaptive	0.782901
Non-adaptive	0.837016
Non-adaptive	0.732125
Non-adaptive	0.771048
Non-adaptive	0.707828
Non-adaptive	0.869156
Non-adaptive	0.819521
Non-adaptive	0.766113
Non-adaptive	0.794531
Non-adaptive	0.770218
Non-adaptive	0.809769
Non-adaptive	0.812966
Non-adaptive	0.766899
Non-adaptive	0.8118
Non-adaptive	0.743003
Non-adaptive	0.745414
Non-adaptive	0.776624
Non-adaptive	0.829636
Non-adaptive	0.796403
Non-adaptive	0.824957
Non-adaptive	0.755902
Non-adaptive	0.783812
Non-adaptive	0.823461
Non-adaptive	0.7413
Non-adaptive	0.832696
Non-adaptive	0.675089
Non-adaptive	0.770363
Non-adaptive	0.838615
Non-adaptive	0.777491
Non-adaptive	0.778515
Non-adaptive	0.737669
Non-adaptive	0.770038
Non-adaptive	0.786864
Non-adaptive	0.801857
Non-adaptive	0.778229
Non-adaptive	0.784089
Non-adaptive	0.819869
Non-adaptive	0.802257
Non-adaptive	0.776789
Non-adaptive	0.847945
Non-adaptive	0.76603
Non-adaptive	0.668795
Non-adaptive	0.82516
Non-adaptive	0.774288
Non-adaptive	0.79716
Non-adaptive	0.766477
Non-adaptive	0.839144
Non-adaptive	0.808322
Non-adaptive	0.849899
Non-adaptive	0.792824
Non-adaptive	0.777119
Non-adaptive	0.753561
Non-adaptive	0.848687
Non-adaptive	0.816019
Non-adaptive	0.721458
Non-adaptive	0.703937
Non-adaptive	0.761067
Non-adaptive	0.76619
Non-adaptive	0.699491
Non-adaptive	0.815642
Non-adaptive	0.735693
Non-adaptive	0.822688
Non-adaptive	0.752684
Non-adaptive	0.819523
Non-adaptive	0.742521
Non-adaptive	0.709225
Non-adaptive	0.773065
Non-adaptive	0.798478
Non-adaptive	0.799658
Non-adaptive	0.799682
Non-adaptive	0.862987
Non-adaptive	0.791634
Non-adaptive	0.82863
Non-adaptive	0.706436
Non-adaptive	0.812787
Non-adaptive	0.731869
Non-adaptive	0.851497
Non-adaptive	0.76655
Non-adaptive	0.842171
Non-adaptive	0.811248
Non-adaptive	0.762877
Non-adaptive	0.769721
Non-adaptive	0.727599
Non-adaptive	0.792204
Non-adaptive	0.794399
Non-adaptive	0.726338
Non-adaptive	0.774203
Non-adaptive	0.821765
Non-adaptive	0.837971
Non-adaptive	0.79028
Non-adaptive	0.746261
Non-adaptive	0.734382
Non-adaptive	0.763475
Non-adaptive	0.823282
Non-adaptive	0.716539
Non-adaptive	0.789188
Non-adaptive	0.766148
Non-adaptive	0.838612
Non-adaptive	0.730743
Non-adaptive	0.803938
Non-adaptive	0.731307
Non-adaptive	0.799963
Non-adaptive	0.795398
Non-adaptive	0.81737
Non-adaptive	0.789345
Non-adaptive	0.758826
Non-adaptive	0.740372
Non-adaptive	0.811385
Non-adaptive	0.779074
Non-adaptive	0.797308
Non-adaptive	0.731982
Non-adaptive	0.780756
Non-adaptive	0.846665
Non-adaptive	0.812012
Non-adaptive	0.694085
Non-adaptive	0.786155
Non-adaptive	0.661726
Non-adaptive	0.828239
Non-adaptive	0.821354
Non-adaptive	0.79893
Non-adaptive	0.750416
Non-adaptive	0.811633
Non-adaptive	0.757051
Non-adaptive	0.705145
Non-adaptive	0.812701
Non-adaptive	0.771995
Non-adaptive	0.781188
Non-adaptive	0.739689
Non-adaptive	0.793604
Non-adaptive	0.75496
Non-adaptive	0.880184
Non-adaptive	0.778991
Non-adaptive	0.863793
Non-adaptive	0.728782
Non-adaptive	0.811411
Non-adaptive	0.808735
Non-adaptive	0.817627
Non-adaptive	0.705959
Non-adaptive	0.846406
Non-adaptive	0.761147
Non-adaptive	0.83678
Non-adaptive	0.7899
Non-adaptive	0.686714
Non-adaptive	0.717291
Non-adaptive	0.791019
Non-adaptive	0.716102
Non-adaptive	0.667648
Non-adaptive	0.804102
Non-adaptive	0.861265
Non-adaptive	0.754205
Non-adaptive	0.781508
Non-adaptive	0.796814
Non-adaptive	0.757152
Non-adaptive	0.764895
Non-adaptive	0.723687
Non-adaptive	0.767242
Non-adaptive	0.780478
Non-adaptive	0.756495
Non-adaptive	0.753873
Non-adaptive	0.867461
Non-adaptive	0.726224
Non-adaptive	0.796358
Non-adaptive	0.749803
Non-adaptive	0.785608
Non-adaptive	0.687777
Non-adaptive	0.776838
Non-adaptive	0.819639
Non-adaptive	0.817745
Non-adaptive	0.672914
Non-adaptive	0.839331
Non-adaptive	0.837135
Non-adaptive	0.838348
Non-adaptive	0.783141
Non-adaptive	0.721677
Non-adaptive	0.709844
Non-adaptive	0.867349
Non-adaptive	0.886467
Non-adaptive	0.689243
Non-adaptive	0.739545
Non-adaptive	0.759017
Non-adaptive	0.842027
Non-adaptive	0.812637
Non-adaptive	0.829532
Non-adaptive	0.814619
Non-adaptive	0.857523
Non-adaptive	0.66949
Non-adaptive	0.758774
Non-adaptive	0.800897
Non-adaptive	0.835254
Non-adaptive	0.785538
Non-adaptive	0.827015
Non-adaptive	0.794012
Non-adaptive	0.818333
Non-adaptive	0.853135
Non-adaptive	0.875033
Non-adaptive	0.727561
Non-adaptive	0.766952
Non-adaptive	0.789866
Non-adaptive	0.733803
Non-adaptive	0.759157
Non-adaptive	0.796064
Non-adaptive	0.776958
Non-adaptive	0.7763
Non-adaptive	0.829783
Non-adaptive	0.793988
Non-adaptive	0.770565
Non-adaptive	0.787929
Non-adaptive	0.791278
Non-adaptive	0.795926
Non-adaptive	0.773123
Non-adaptive	0.768078
Non-adaptive	0.76366
Non-adaptive	0.856888
Non-adaptive	0.782735
Non-adaptive	0.804562
Non-adaptive	0.785503
Non-adaptive	0.850265
Non-adaptive	0.821701
Non-adaptive	0.825391
Non-adaptive	0.709245
Non-adaptive	0.772635
Non-adaptive	0.870394
Non-adaptive	0.821972
Non-adaptive	0.716845
Non-adaptive	0.841762
Non-adaptive	0.702575
Non-adaptive	0.836508
Non-adaptive	0.819438
Non-adaptive	0.70437
Non-adaptive	0.811084
Non-adaptive	0.791602
Non-adaptive	0.793223
Non-adaptive	0.778658
Non-adaptive	0.78607
Non-adaptive	0.742572
Non-adaptive	0.765609
Non-adaptive	0.821733
Non-adaptive	0.692846
Non-adaptive	0.841942
Non-adaptive	0.776
Non-adaptive	0.824126
Non-adaptive	0.784845
Non-adaptive	0.784827
Non-adaptive	0.775366
Non-adaptive	0.854003
Non-adaptive	0.815488
Non-adaptive	0.790467
Non-adaptive	0.766234
Non-adaptive	0.836522
Non-adaptive	0.777933
Non-adaptive	0.778618
Non-adaptive	0.87949
Non-adaptive	0.791756
Non-adaptive	0.809501
Non-adaptive	0.756956
Non-adaptive	0.849884
Non-adaptive	0.729505
Non-adaptive	0.848005
Non-adaptive	0.794651
Non-adaptive	0.777165
Non-adaptive	0.833909
Non-adaptive	0.848348
Non-adaptive	0.770636
Non-adaptive	0.791183
Non-adaptive	0.722773
Non-adaptive	0.675827
Non-adaptive	0.864212
Non-adaptive	0.830568
Non-adaptive	0.771298
Non-adaptive	0.77257
Non-adaptive	0.791216
Non-adaptive	0.733924
Non-adaptive	0.764654
Non-adaptive	0.798779
Non-adaptive	0.802085
Non-adaptive	0.75869
Non-adaptive	0.834138
Non-adaptive	0.779556
Non-adaptive	0.84197
Non-adaptive	0.733856
Non-adaptive	0.782776
Non-adaptive	0.832684
Non-adaptive	0.845985
Non-adaptive	0.789144
Non-adaptive	0.776806
Non-adaptive	0.864485
Non-adaptive	0.690615
Non-adaptive	0.795165
Non-adaptive	0.795149
Non-adaptive	0.722527
Non-adaptive	0.868459
Non-adaptive	0.747175
Non-adaptive	0.73579
Non-adaptive	0.773502
Non-adaptive	0.756624
Non-adaptive	0.745355
Non-adaptive	0.786298
Non-adaptive	0.787338
Non-adaptive	0.783313
Non-adaptive	0.81436
Non-adaptive	0.841886
Non-adaptive	0.897601
Non-adaptive	0.819569
Non-adaptive	0.706249
Non-adaptive	0.748052
Non-adaptive	0.814196
Non-adaptive	0.799889
Non-adaptive	0.826428
Non-adaptive	0.807793
Non-adaptive	0.70119
Non-adaptive	0.799395
Non-adaptive	0.752721
Non-adaptive	0.799878
Non-adaptive	0.834901
Non-adaptive	0.832931
Non-adaptive	0.731385
Non-adaptive	0.798926
Non-adaptive	0.767526
Non-adaptive	0.813904
Non-adaptive	0.82985
Non-adaptive	0.799923
Non-adaptive	0.769016
Non-adaptive	0.778008
Non-adaptive	0.80924
Non-adaptive	0.808891
Non-adaptive	0.798416
Non-adaptive	0.744329
Non-adaptive	0.799849
Non-adaptive	0.741211
Non-adaptive	0.774403
Non-adaptive	0.804086
Non-adaptive	0.787223
Non-adaptive	0.817283
Non-adaptive	0.842375
Non-adaptive	0.782564
Non-adaptive	0.77344
Non-adaptive	0.775693
Non-adaptive	0.814142
Non-adaptive	0.693072
Non-adaptive	0.727339
Non-adaptive	0.833376
Non-adaptive	0.785643
Non-adaptive	0.770495
Non-adaptive	0.688302
Non-adaptive	0.82443
Non-adaptive	0.783092
Non-adaptive	0.810813
Non-adaptive	0.747532
Non-adaptive	0.831619
Non-adaptive	0.837717
Non-adaptive	0.875988
Non-adaptive	0.816509
Non-adaptive	0.790097
Non-adaptive	0.807698
Non-adaptive	0.79023
Non-adaptive	0.758003
Non-adaptive	0.79224
Non-adaptive	0.794657
Non-adaptive	0.825474
Non-adaptive	0.856178
Non-adaptive	0.786276
Non-adaptive	0.644766
Non-adaptive	0.788919
Non-adaptive	0.770068
Non-adaptive	0.861944
Non-adaptive	0.799422
Non-adaptive	0.83669
Non-adaptive	0.779296
Non-adaptive	0.789093
Non-adaptive	0.801294
Non-adaptive	0.857994
Non-adaptive	0.830614
Non-adaptive	0.761018
Non-adaptive	0.762834
Non-adaptive	0.857719
Non-adaptive	0.792777
Non-adaptive	0.829223
Non-adaptive	0.820994
Non-adaptive	0.720487
Non-adaptive	0.743046
Non-adaptive	0.790521
Non-adaptive	0.786476
Non-adaptive	0.743136
Non-adaptive	0.81814
Non-adaptive	0.874454
Non-adaptive	0.826529
Non-adaptive	0.79336
Non-adaptive	0.718115
Non-adaptive	0.793418
Non-adaptive	0.74921
Non-adaptive	0.821391
Non-adaptive	0.816112
Non-adaptive	0.759623
Non-adaptive	0.738914
Non-adaptive	0.713096
Non-adaptive	0.715768
Non-adaptive	0.804564
Non-adaptive	0.760417
Non-adaptive	0.735595
Non-adaptive	0.807409
Non-adaptive	0.945595
Non-adaptive	0.761567
Non-adaptive	0.728992
Non-adaptive	0.871784
Non-adaptive	0.817339
Non-adaptive	0.788114
Non-adaptive	0.827984
Non-adaptive	0.803416
Non-adaptive	0.756181
Non-adaptive	0.830238
Non-adaptive	0.672634
Non-adaptive	0.747729
Non-adaptive	0.806074
Non-adaptive	0.81092
Non-adaptive	0.844511
Non-adaptive	0.825559
Non-adaptive	0.795924
Non-adaptive	0.683215
Non-adaptive	0.777659
Non-adaptive	0.771248
Non-adaptive	0.846225
Non-adaptive	0.826622
Non-adaptive	0.724845
Non-adaptive	0.796045
Non-adaptive	0.775811
Non-adaptive	0.851918
Non-adaptive	0.887548
Non-adaptive	0.774883
Non-adaptive	0.833312
Non-adaptive	0.807299
Non-adaptive	0.777284
Non-adaptive	0.823191
Non-adaptive	0.836168
Non-adaptive	0.810296
Non-adaptive	0.785364
Non-adaptive	0.753758
Non-adaptive	0.701161
Non-adaptive	0.819756
Non-adaptive	0.808278
Non-adaptive	0.800556
Non-adaptive	0.754289
Non-adaptive	0.831806
Non-adaptive	0.833403
Non-adaptive	0.771663
Non-adaptive	0.707983
Non-adaptive	0.77788
Non-adaptive	0.817283
Non-adaptive	0.787133
Non-adaptive	0.674706
Non-adaptive	0.833413
Non-adaptive	0.750404
Non-adaptive	0.820455
Non-adaptive	0.67112
Non-adaptive	0.771936
Non-adaptive	0.83576
Non-adaptive	0.754105
Non-adaptive	0.755717
Non-adaptive	0.848717
Non-adaptive	0.842757
Non-adaptive	0.750521
Non-adaptive	0.783562
Non-adaptive	0.834843
Non-adaptive	0.791254
Non-adaptive	0.823635
Non-adaptive	0.78518
Non-adaptive	0.795098
Non-adaptive	0.665512
Non-adaptive	0.839517
Non-adaptive	0.77775
Non-adaptive	0.777547
Non-adaptive	0.812882
Non-adaptive	0.79853
Non-adaptive	0.766169
Non-adaptive	0.838958
Non-adaptive	0.807998
Non-adaptive	0.740569
Non-adaptive	0.779536
Non-adaptive	0.758805
Non-adaptive	0.747384
Non-adaptive	0.844662
Non-adaptive	0.670744
Non-adaptive	0.775132
Non-adaptive	0.780618
Non-adaptive	0.879611
Non-adaptive	0.720694
Non-adaptive	0.868389
Non-adaptive	0.748354
Non-adaptive	0.715618
Non-adaptive	0.73807
Non-adaptive	0.784616
Non-adaptive	0.751501
Non-adaptive	0.746888
Non-adaptive	0.719673
Non-adaptive	0.763681
Non-adaptive	0.75881
Non-adaptive	0.788093
Non-adaptive	0.779434
Non-adaptive	0.711069
Non-adaptive	0.791534
Non-adaptive	0.764131
Non-adaptive	0.798076
Non-adaptive	0.811622
Non-adaptive	0.777754
Non-adaptive	0.790671
Non-adaptive	0.716705
Non-adaptive	0.814997
Non-adaptive	0.785707
Non-adaptive	0.797946
Non-adaptive	0.831463
Non-adaptive	0.733647
Non-adaptive	0.772216
Non-adaptive	0.800362
Non-adaptive	0.68035
Non-adaptive	0.790439
Non-adaptive	0.820787
Non-adaptive	0.820856
Non-adaptive	0.875332
Non-adaptive	0.822844
Non-adaptive	0.77038
Non-adaptive	0.735483
Non-adaptive	0.759579
Non-adaptive	0.792056
Non-adaptive	0.787891
Non-adaptive	0.799543
Non-adaptive	0.769174
Non-adaptive	0.801986
Non-adaptive	0.826586
Non-adaptive	0.763286
Non-adaptive	0.783506
Non-adaptive	0.748959
Non-adaptive	0.814534
Non-adaptive	0.769593
Non-adaptive	0.805564
Non-adaptive	0.692932
Non-adaptive	0.789018
Non-adaptive	0.720143
Non-adaptive	0.767876
Non-adaptive	0.807506
Non-adaptive	0.838092
Non-adaptive	0.799655
Non-adaptive	0.775386
Non-adaptive	0.719172
Non-adaptive	0.779488
Non-adaptive	0.816829
Non-adaptive	0.811362
Non-adaptive	0.790209
Non-adaptive	0.808675
Non-adaptive	0.690522
Non-adaptive	0.72788
Non-adaptive	0.840731
Non-adaptive	0.796266
Non-adaptive	0.780425
Non-adaptive	0.785624
Non-adaptive	0.793793
Non-adaptive	0.774256
Non-adaptive	0.787893
Non-adaptive	0.797169
Non-adaptive	0.688518
Non-adaptive	0.780427
Non-adaptive	0.776726
Non-adaptive	0.733884
Non-adaptive	0.829247
Non-adaptive	0.791681
Non-adaptive	0.852161
Non-adaptive	0.865254
Non-adaptive	0.834696
Non-adaptive	0.786879
Non-adaptive	0.804103
Non-adaptive	0.73277
Non-adaptive	0.771506
Non-adaptive	0.781994
Non-adaptive	0.773431
Non-adaptive	0.86282
Non-adaptive	0.775071
Non-adaptive	0.804217
Non-adaptive	0.731086
Non-adaptive	0.757191
Non-adaptive	0.747598
Non-adaptive	0.760462
Non-adaptive	0.780274
Non-adaptive	0.801337
Non-adaptive	0.791722
Non-adaptive	0.821301
Non-adaptive	0.737216
Non-adaptive	0.80247
Non-adaptive	0.817886
Non-adaptive	0.817428
Non-adaptive	0.801918
Non-adaptive	0.736492
Non-adaptive	0.770649
Non-adaptive	0.795042
Non-adaptive	0.768096
Non-adaptive	0.737969
Non-adaptive	0.799745
Non-adaptive	0.803857
Non-adaptive	0.794348
Non-adaptive	0.739252
Non-adaptive	0.813797
Non-adaptive	0.780046
Non-adaptive	0.786304
Non-adaptive	0.795285
Non-adaptive	0.749836
Non-adaptive	0.798789
Non-adaptive	0.802235
Non-adaptive	0.810185
Non-adaptive	0.727405
Non-adaptive	0.839027
Non-adaptive	0.806418
Non-adaptive	0.840749
Non-adaptive	0.774633
Non-adaptive	0.78884
Non-adaptive	0.684842
Non-adaptive	0.782346
Non-adaptive	0.850696
Non-adaptive	0.79278
Non-adaptive	0.760995
Non-adaptive	0.789426
Non-adaptive	0.777485
Non-adaptive	0.802612
Non-adaptive	0.809828
Non-adaptive	0.790332
Non-adaptive	0.829138
Non-adaptive	0.80411
Non-adaptive	0.868884
Non-adaptive	0.75786
Non-adaptive	0.823386
Non-adaptive	0.740752
Non-adaptive	0.760366
Non-adaptive	0.763707
Non-adaptive	0.850942
Non-adaptive	0.785887
Non-adaptive	0.776986
Non-adaptive	0.748201
Non-adaptive	0.845628
Non-adaptive	0.732704
Non-adaptive	0.805423
Non-adaptive	0.803077
Non-adaptive	0.808565
Non-adaptive	0.772111
Non-adaptive	0.786349
Non-adaptive	0.757403
Non-adaptive	0.770399
Non-adaptive	0.835613
Non-adaptive	0.823187
Non-adaptive	0.756495
Non-adaptive	0.816882
Non-adaptive	0.811435
Non-adaptive	0.796683
Non-adaptive	0.786984
Non-adaptive	0.819377
Non-adaptive	0.770408
Non-adaptive	0.731358
Non-adaptive	0.858528
Non-adaptive	0.759708
Non-adaptive	0.756147
Non-adaptive	0.799117
Non-adaptive	0.728806
Non-adaptive	0.769242
Non-adaptive	0.908286
Non-adaptive	0.744381
Non-adaptive	0.848816
Non-adaptive	0.687032
Non-adaptive	0.784057
Non-adaptive	0.827096
Non-adaptive	0.686686
Non-adaptive	0.76469
Non-adaptive	0.750266
Non-adaptive	0.722482
Non-adaptive	0.812448
Non-adaptive	0.776191
Non-adaptive	0.738256
Non-adaptive	0.826927
Non-adaptive	0.834443
Non-adaptive	0.822781
Non-adaptive	0.776933
Non-adaptive	0.842359
Non-adaptive	0.756214
Non-adaptive	0.797494
Non-adaptive	0.801471
Non-adaptive	0.903725
Non-adaptive	0.824288
Non-adaptive	0.803018
Non-adaptive	0.799896
Non-adaptive	0.808908
Non-adaptive	0.792627
Non-adaptive	0.768708
Non-adaptive	0.762422
Non-adaptive	0.810283
Non-adaptive	0.778058
Non-adaptive	0.821791
Non-adaptive	0.771626
Non-adaptive	0.758836
Non-adaptive	0.784175
Non-adaptive	0.772927
Non-adaptive	0.743873
Non-adaptive	0.791654
Non-adaptive	0.803477
Non-adaptive	0.727297
Non-adaptive	0.83847
Non-adaptive	0.767458
Non-adaptive	0.848841
Non-adaptive	0.76895
Non-adaptive	0.718876
Non-adaptive	0.739445
Non-adaptive	0.7426
Non-adaptive	0.836474
Non-adaptive	0.805954
Non-adaptive	0.849619
Non-adaptive	0.758861
Non-adaptive	0.704305
Non-adaptive	0.824384
Non-adaptive	0.809346
Non-adaptive	0.819252
Non-adaptive	0.742751
Non-adaptive	0.7954
Non-adaptive	0.819622
Non-adaptive	0.76412
Non-adaptive	0.673597
Non-adaptive	0.767845
Non-adaptive	0.748221
Non-adaptive	0.796713
Non-adaptive	0.877642
Non-adaptive	0.771018
Non-adaptive	0.775781
Non-adaptive	0.853631
Non-adaptive	0.826734
Non-adaptive	0.731358
Non-adaptive	0.769463
Non-adaptive	0.796035
Non-adaptive	0.799395
Non-adaptive	0.732272
Non-adaptive	0.810041
Non-adaptive	0.852007
Non-adaptive	0.872993
Non-adaptive	0.7156
Non-adaptive	0.769186
Non-adaptive	0.808495
Non-adaptive	0.813576
Non-adaptive	0.76195
Non-adaptive	0.763545
Non-adaptive	0.798465
Non-adaptive	0.815564
Non-adaptive	0.721335
Non-adaptive	0.786667
Non-adaptive	0.796347
Non-adaptive	0.778421
Non-adaptive	0.808934
Non-adaptive	0.812475
Non-adaptive	0.755988
Non-adaptive	0.68604
Non-adaptive	0.745814
Non-adaptive	0.870661
Non-adaptive	0.831641
Non-adaptive	0.76366
Non-adaptive	0.851538
Non-adaptive	0.825985
Non-adaptive	0.763932
Non-adaptive	0.813125
Non-adaptive	0.737193
Non-adaptive	0.731846
Non-adaptive	0.866975
Non-adaptive	0.793012
Non-adaptive	0.786945
Non-adaptive	0.807692
Non-adaptive	0.785398
Non-adaptive	0.817466
Non-adaptive	0.822194
Non-adaptive	0.800592
Non-adaptive	0.793815
Non-adaptive	0.804879
Non-adaptive	0.756471
Non-adaptive	0.810184
Non-adaptive	0.726083
Non-adaptive	0.864879
Non-adaptive	0.816169
Non-adaptive	0.832004
Non-adaptive	0.856393
Non-adaptive	0.756627
Non-adaptive	0.778201
Non-adaptive	0.723875
Non-adaptive	0.834225
Non-adaptive	0.887351
Non-adaptive	0.705183
Non-adaptive	0.856209
Non-adaptive	0.816576
Non-adaptive	0.802475
Non-adaptive	0.741032
Non-adaptive	0.72244
Non-adaptive	0.77221
Non-adaptive	0.793416
Non-adaptive	0.797603
Non-adaptive	0.764698
Non-adaptive	0.746244
Non-adaptive	0.760248
Non-adaptive	0.794299
Non-adaptive	0.836495
Non-adaptive	0.743768
Non-adaptive	0.759126
Non-adaptive	0.770265
Non-adaptive	0.747259
Non-adaptive	0.895427
Non-adaptive	0.7204
Non-adaptive	0.783958
Non-adaptive	0.719631
Non-adaptive	0.726918
Non-adaptive	0.75821
Non-adaptive	0.775176
Non-adaptive	0.786342
Non-adaptive	0.880103
Non-adaptive	0.70671
Non-adaptive	0.760056
Non-adaptive	0.762007
Non-adaptive	0.786546
Non-adaptive	0.845584
Non-adaptive	0.782323
Non-adaptive	0.76549
Non-adaptive	0.757011
Non-adaptive	0.708646
Non-adaptive	0.761592
Non-adaptive	0.798347
Non-adaptive	0.745903
Non-adaptive	0.761704
Non-adaptive	0.785104
Non-adaptive	0.743928
Non-adaptive	0.823986
Non-adaptive	0.813149
Non-adaptive	0.722408
Non-adaptive	0.787972
Non-adaptive	0.835023
Non-adaptive	0.766312
Non-adaptive	0.719136
Non-adaptive	0.742082
Non-adaptive	0.836607
Non-adaptive	0.791968
Non-adaptive	0.779314
Non-adaptive	0.777641
Non-adaptive	0.82604
Non-adaptive	0.811489
Non-adaptive	0.774249
Non-adaptive	0.846142
Non-adaptive	0.89441
Non-adaptive	0.77136
Non-adaptive	0.773932
Non-adaptive	0.796978
Non-adaptive	0.842193
Non-adaptive	0.774373
Non-adaptive	0.728295
Non-adaptive	0.798704
Non-adaptive	0.774755
Non-adaptive	0.76131
Non-adaptive	0.753595
Non-adaptive	0.748546
Non-adaptive	0.748188
Non-adaptive	0.83538
Non-adaptive	0.771432
Non-adaptive	0.783297
Non-adaptive	0.762824
Non-adaptive	0.756546
Non-adaptive	0.851857
Non-adaptive	0.746549
Non-adaptive	0.705432
Non-adaptive	0.724864
Non-adaptive	0.691549
Non-adaptive	0.932928
Non-adaptive	0.814341
Non-adaptive	0.715372
Non-adaptive	0.720384
Non-adaptive	0.779646
Non-adaptive	0.790523
Non-adaptive	0.840919
Non-adaptive	0.804933
Non-adaptive	0.751256
Non-adaptive	0.759284
Non-adaptive	0.773098
Non-adaptive	0.843375
Non-adaptive	0.709725
Non-adaptive	0.790888
Non-adaptive	0.765488
Non-adaptive	0.785977
Non-adaptive	0.704893
Non-adaptive	0.771603
Non-adaptive	0.71814
Non-adaptive	0.830782
Non-adaptive	0.712328
Non-adaptive	0.78566
Non-adaptive	0.784027
Non-adaptive	0.826699
Non-adaptive	0.816166
Non-adaptive	0.867884
Non-adaptive	0.789507
Non-adaptive	0.872479
Non-adaptive	0.81518
Non-adaptive	0.84583
Non-adaptive	0.811889
Non-adaptive	0.797018
Non-adaptive	0.773394
Non-adaptive	0.8177
Non-adaptive	0.8336
Non-adaptive	0.73761
Non-adaptive	0.786529
Non-adaptive	0.834952
Non-adaptive	0.843154
Non-adaptive	0.731626
Non-adaptive	0.794972
Non-adaptive	0.868185
Non-adaptive	0.84679
Non-adaptive	0.791555
Non-adaptive	0.808359
Non-adaptive	0.859746
Non-adaptive	0.806193
Non-adaptive	0.670467
Non-adaptive	0.83905
Non-adaptive	0.763307
Non-adaptive	0.715672
Non-adaptive	0.76226
Non-adaptive	0.723774
Non-adaptive	0.709915
Non-adaptive	0.75128
Non-adaptive	0.684175
Non-adaptive	0.766152
Non-adaptive	0.766816
Non-adaptive	0.759479
Non-adaptive	0.789884
Non-adaptive	0.764802
Non-adaptive	0.806439
Non-adaptive	0.751936
Non-adaptive	0.762085
Non-adaptive	0.826882
Non-adaptive	0.756296
Non-adaptive	0.768961
Non-adaptive	0.723101
Non-adaptive	0.774462
Non-adaptive	0.901767
Non-adaptive	0.774954
Non-adaptive	0.691988
Non-adaptive	0.78484
Non-adaptive	0.710449
Non-adaptive	0.686209
Non-adaptive	0.776482
Non-adaptive	0.775394
Non-adaptive	0.825953
Non-adaptive	0.730247
Non-adaptive	0.778317
Non-adaptive	0.783238
Non-adaptive	0.716982
Non-adaptive	0.792389
Non-adaptive	0.748747
Non-adaptive	0.703124
Non-adaptive	0.810596
Non-adaptive	0.792405
Non-adaptive	0.691605
Non-adaptive	0.794267
Non-adaptive	0.803148
Non-adaptive	0.793604
Non-adaptive	0.749919
Non-adaptive	0.748091
Non-adaptive	0.781789
Non-adaptive	0.692197
Non-adaptive	0.817264
Non-adaptive	0.719425
Non-adaptive	0.810691
Non-adaptive	0.729825
Non-adaptive	0.732104
Non-adaptive	0.814375
Non-adaptive	0.790461
Non-adaptive	0.834912
Non-adaptive	0.886746
Non-adaptive	0.80459
Non-adaptive	0.683681
Non-adaptive	0.789124
Non-adaptive	0.752387
Non-adaptive	0.689715
Non-adaptive	0.84076
Non-adaptive	0.804223
Non-adaptive	0.813915
Non-adaptive	0.754024
Non-adaptive	0.753706
Non-adaptive	0.91586
Non-adaptive	0.811095
Non-adaptive	0.740292
Non-adaptive	0.774837
Non-adaptive	0.850055
Non-adaptive	0.807228
Non-adaptive	0.686602
Non-adaptive	0.840334
Non-adaptive	0.834901
Non-adaptive	0.746932
Non-adaptive	0.759715
Non-adaptive	0.768508
Non-adaptive	0.775819
Non-adaptive	0.833677
Non-adaptive	0.743374
Non-adaptive	0.850054
Non-adaptive	0.812288
Non-adaptive	0.794692
Non-adaptive	0.68912
Non-adaptive	0.760129
Non-adaptive	0.806088
Non-adaptive	0.83347
Non-adaptive	0.781094
Non-adaptive	0.856706
Non-adaptive	0.770145
Non-adaptive	0.843413
Non-adaptive	0.862593
Non-adaptive	0.794113
Non-adaptive	0.703287
Non-adaptive	0.775974
Non-adaptive	0.746166
Non-adaptive	0.796033
Non-adaptive	0.741532
Non-adaptive	0.702591
Non-adaptive	0.845043
Non-adaptive	0.713049
Non-adaptive	0.839378
Non-adaptive	0.791008
Non-adaptive	0.798218
Non-adaptive	0.709228
Non-adaptive	0.771863
Non-adaptive	0.78031
Non-adaptive	0.692555
Non-adaptive	0.794077
Non-adaptive	0.818469
Non-adaptive	0.756858
Non-adaptive	0.704922
Non-adaptive	0.809355
Non-adaptive	0.749458
Non-adaptive	0.775759
Non-adaptive	0.823312
Non-adaptive	0.779798
Non-adaptive	0.841515
Non-adaptive	0.849329
Non-adaptive	0.755662
Non-adaptive	0.727621
Non-adaptive	0.808308
Non-adaptive	0.752228
Non-adaptive	0.716216
Non-adaptive	0.739809
Non-adaptive	0.746155
Non-adaptive	0.832658
Non-adaptive	0.764623
Non-adaptive	0.814719
Non-adaptive	0.79765
Non-adaptive	0.760541
Non-adaptive	0.692082
Non-adaptive	0.763575
Non-adaptive	0.841068
Non-adaptive	0.806005
Non-adaptive	0.788093
Non-adaptive	0.803808
Non-adaptive	0.774551
Non-adaptive	0.759963
Non-adaptive	0.73347
Non-adaptive	0.786793
Non-adaptive	0.81141
Non-adaptive	0.854486
Non-adaptive	0.703974
Non-adaptive	0.787426
Non-adaptive	0.807519
Non-adaptive	0.764565
Non-adaptive	0.808959
Non-adaptive	0.686721
Non-adaptive	0.823521
Non-adaptive	0.840454
Non-adaptive	0.803303
Non-adaptive	0.751066
Non-adaptive	0.787546
Non-adaptive	0.823386
Non-adaptive	0.695228
Non-adaptive	0.753864
Non-adaptive	0.730728
Non-adaptive	0.754199
Non-adaptive	0.872001
Non-adaptive	0.829672
Non-adaptive	0.816045
Non-adaptive	0.743329
Non-adaptive	0.764343
Non-adaptive	0.882817
Non-adaptive	0.790652
Non-adaptive	0.751054
Non-adaptive	0.769082
Non-adaptive	0.80158
Non-adaptive	0.790642
Non-adaptive	0.782547
Non-adaptive	0.812045
Non-adaptive	0.833986
Non-adaptive	0.793728
Non-adaptive	0.773268
Non-adaptive	0.749241
Non-adaptive	0.729275
Non-adaptive	0.749429
Non-adaptive	0.673527
Non-adaptive	0.722047
Non-adaptive	0.809325
Non-adaptive	0.813257
Non-adaptive	0.744025
Non-adaptive	0.790373
Non-adaptive	0.86616
Non-adaptive	0.877922
Non-adaptive	0.756831
Non-adaptive	0.853878
Non-adaptive	0.75068
Non-adaptive	0.851105
Non-adaptive	0.750096
Non-adaptive	0.725043
Non-adaptive	0.833478
Non-adaptive	0.883733
Non-adaptive	0.844762
Non-adaptive	0.803861
Non-adaptive	0.756746
Non-adaptive	0.743848
Non-adaptive	0.713446
Non-adaptive	0.765761
Non-adaptive	0.868956
Non-adaptive	0.79868
Non-adaptive	0.771566
Non-adaptive	0.800639
Non-adaptive	0.721922
Non-adaptive	0.716403
Non-adaptive	0.758569
Non-adaptive	0.775798
Non-adaptive	0.788678
Non-adaptive	0.741841
Non-adaptive	0.841102
Non-adaptive	0.83391
Non-adaptive	0.775612
Non-adaptive	0.79161
Non-adaptive	0.810652
Non-adaptive	0.733592
Non-adaptive	0.69842
Non-adaptive	0.824209
Non-adaptive	0.753865
Non-adaptive	0.729814
Non-adaptive	0.78572
Non-adaptive	0.826813
Non-adaptive	0.762123
Non-adaptive	0.745266
Non-adaptive	0.806941
Non-adaptive	0.80085
Non-adaptive	0.749346
Non-adaptive	0.742768
Non-adaptive	0.814978
Non-adaptive	0.876816
Non-adaptive	0.794387
Non-adaptive	0.744405
Non-adaptive	0.823195
Non-adaptive	0.835678
Non-adaptive	0.857191
Non-adaptive	0.658042
Non-adaptive	0.731925
Non-adaptive	0.868707
Non-adaptive	0.734083
Non-adaptive	0.808722
Non-adaptive	0.847269
Non-adaptive	0.798861
Non-adaptive	0.767363
Non-adaptive	0.724267
Non-adaptive	0.741393
Non-adaptive	0.758488
Non-adaptive	0.802959
Non-adaptive	0.789311
Non-adaptive	0.837723
Non-adaptive	0.838362
Non-adaptive	0.696001
Non-adaptive	0.748445
Non-adaptive	0.729232
Non-adaptive	0.764905
Non-adaptive	0.760039
Non-adaptive	0.817668
Non-adaptive	0.821229
Non-adaptive	0.805963
Non-adaptive	0.716807
Non-adaptive	0.819624
Non-adaptive	0.850622
Non-adaptive	0.744221
Non-adaptive	0.741975
Non-adaptive	0.811574
Non-adaptive	0.856103
Non-adaptive	0.71234
Non-adaptive	0.811026
Non-adaptive	0.78186
Non-adaptive	0.834692
Non-adaptive	0.775221
Non-adaptive	0.728655
[truncated: 8,002 more rows]

## Sheet: Figure 5B
Figure 5B. Allelic similarity between Par_N16 and SNPs with significant FST implicated as adaptive to Mesoamerican lowland landraces. Adaptive, from a list of 668 adaptive SNPs; Non-adaptive, from random lists of 32 non adaptive SNPs.
Group	Proportion
Adaptive	0.743608
Non-adaptive	0.835369
Non-adaptive	0.817173
Non-adaptive	0.830049
Non-adaptive	0.790793
Non-adaptive	0.720139
Non-adaptive	0.784096
Non-adaptive	0.784969
Non-adaptive	0.818584
Non-adaptive	0.862811
Non-adaptive	0.742382
Non-adaptive	0.817753
Non-adaptive	0.872634
Non-adaptive	0.766892
Non-adaptive	0.810432
Non-adaptive	0.755054
Non-adaptive	0.735238
Non-adaptive	0.819227
Non-adaptive	0.796313
Non-adaptive	0.752669
Non-adaptive	0.694634
Non-adaptive	0.737765
Non-adaptive	0.849414
Non-adaptive	0.802274
Non-adaptive	0.803695
Non-adaptive	0.825324
Non-adaptive	0.739723
Non-adaptive	0.665584
Non-adaptive	0.835879
Non-adaptive	0.832314
Non-adaptive	0.790079
Non-adaptive	0.851337
Non-adaptive	0.742408
Non-adaptive	0.838984
Non-adaptive	0.897351
Non-adaptive	0.830136
Non-adaptive	0.733222
Non-adaptive	0.767268
Non-adaptive	0.789009
Non-adaptive	0.824658
Non-adaptive	0.712737
Non-adaptive	0.799426
Non-adaptive	0.830522
Non-adaptive	0.92098
Non-adaptive	0.849394
Non-adaptive	0.815107
Non-adaptive	0.678635
Non-adaptive	0.816475
Non-adaptive	0.799339
Non-adaptive	0.835979
Non-adaptive	0.80883
Non-adaptive	0.823228
Non-adaptive	0.824671
Non-adaptive	0.795436
Non-adaptive	0.815805
Non-adaptive	0.827824
Non-adaptive	0.872171
Non-adaptive	0.906373
Non-adaptive	0.738529
Non-adaptive	0.800022
Non-adaptive	0.780029
Non-adaptive	0.826526
Non-adaptive	0.841587
Non-adaptive	0.743668
Non-adaptive	0.771298
Non-adaptive	0.798832
Non-adaptive	0.864901
Non-adaptive	0.800103
Non-adaptive	0.778311
Non-adaptive	0.866357
Non-adaptive	0.799546
Non-adaptive	0.821494
Non-adaptive	0.815328
Non-adaptive	0.826183
Non-adaptive	0.83546
Non-adaptive	0.833216
Non-adaptive	0.817235
Non-adaptive	0.749276
Non-adaptive	0.836808
Non-adaptive	0.766102
Non-adaptive	0.709591
Non-adaptive	0.796079
Non-adaptive	0.822541
Non-adaptive	0.789362
Non-adaptive	0.744489
Non-adaptive	0.850818
Non-adaptive	0.870579
Non-adaptive	0.772178
Non-adaptive	0.763934
Non-adaptive	0.818156
Non-adaptive	0.810529
Non-adaptive	0.730074
Non-adaptive	0.796279
Non-adaptive	0.893154
Non-adaptive	0.844885
Non-adaptive	0.89774
Non-adaptive	0.85368
Non-adaptive	0.825507
Non-adaptive	0.803557
Non-adaptive	0.701438
Non-adaptive	0.799386
Non-adaptive	0.825765
Non-adaptive	0.863508
Non-adaptive	0.834272
Non-adaptive	0.831478
Non-adaptive	0.761515
Non-adaptive	0.793795
Non-adaptive	0.88983
Non-adaptive	0.830542
Non-adaptive	0.802626
Non-adaptive	0.83197
Non-adaptive	0.71738
Non-adaptive	0.827823
Non-adaptive	0.819348
Non-adaptive	0.699944
Non-adaptive	0.761301
Non-adaptive	0.849159
Non-adaptive	0.84822
Non-adaptive	0.806337
Non-adaptive	0.782594
Non-adaptive	0.806671
Non-adaptive	0.777648
Non-adaptive	0.861965
Non-adaptive	0.793445
Non-adaptive	0.790277
Non-adaptive	0.832244
Non-adaptive	0.835966
Non-adaptive	0.863903
Non-adaptive	0.765413
Non-adaptive	0.745871
Non-adaptive	0.8391
Non-adaptive	0.8324
Non-adaptive	0.75412
Non-adaptive	0.787957
Non-adaptive	0.821884
Non-adaptive	0.781782
Non-adaptive	0.778943
Non-adaptive	0.8193
Non-adaptive	0.842238
Non-adaptive	0.749781
Non-adaptive	0.83016
Non-adaptive	0.770588
Non-adaptive	0.841108
Non-adaptive	0.897612
Non-adaptive	0.761776
Non-adaptive	0.784595
Non-adaptive	0.802455
Non-adaptive	0.775211
Non-adaptive	0.891446
Non-adaptive	0.810783
Non-adaptive	0.835054
Non-adaptive	0.832189
Non-adaptive	0.773507
Non-adaptive	0.789782
Non-adaptive	0.83479
Non-adaptive	0.80262
Non-adaptive	0.757667
Non-adaptive	0.88111
Non-adaptive	0.86845
Non-adaptive	0.753632
Non-adaptive	0.811023
Non-adaptive	0.814751
Non-adaptive	0.72945
Non-adaptive	0.837931
Non-adaptive	0.869848
Non-adaptive	0.817207
Non-adaptive	0.825037
Non-adaptive	0.772994
Non-adaptive	0.678203
Non-adaptive	0.792262
Non-adaptive	0.762629
Non-adaptive	0.844662
Non-adaptive	0.804073
Non-adaptive	0.814437
Non-adaptive	0.83225
Non-adaptive	0.754035
Non-adaptive	0.887756
Non-adaptive	0.655796
Non-adaptive	0.780501
Non-adaptive	0.810524
Non-adaptive	0.844114
Non-adaptive	0.805149
Non-adaptive	0.867241
Non-adaptive	0.860429
Non-adaptive	0.770511
Non-adaptive	0.797449
Non-adaptive	0.838799
Non-adaptive	0.739916
Non-adaptive	0.754946
Non-adaptive	0.80974
Non-adaptive	0.760995
Non-adaptive	0.79953
Non-adaptive	0.827021
Non-adaptive	0.785804
Non-adaptive	0.759761
Non-adaptive	0.821404
Non-adaptive	0.832141
Non-adaptive	0.944044
Non-adaptive	0.811584
Non-adaptive	0.699463
Non-adaptive	0.873085
Non-adaptive	0.814134
Non-adaptive	0.808399
Non-adaptive	0.767451
Non-adaptive	0.830672
Non-adaptive	0.790142
Non-adaptive	0.835783
Non-adaptive	0.838648
Non-adaptive	0.794272
Non-adaptive	0.838352
Non-adaptive	0.836355
Non-adaptive	0.783425
Non-adaptive	0.769449
Non-adaptive	0.815434
Non-adaptive	0.818772
Non-adaptive	0.788414
Non-adaptive	0.777518
Non-adaptive	0.836878
Non-adaptive	0.838615
Non-adaptive	0.786994
Non-adaptive	0.763304
Non-adaptive	0.858803
Non-adaptive	0.798321
Non-adaptive	0.843388
Non-adaptive	0.781576
Non-adaptive	0.799948
Non-adaptive	0.832941
Non-adaptive	0.845625
Non-adaptive	0.779814
Non-adaptive	0.788762
Non-adaptive	0.776782
Non-adaptive	0.860397
Non-adaptive	0.792816
Non-adaptive	0.844561
Non-adaptive	0.777605
Non-adaptive	0.750956
Non-adaptive	0.793483
Non-adaptive	0.743537
Non-adaptive	0.832591
Non-adaptive	0.80116
Non-adaptive	0.829208
Non-adaptive	0.851234
Non-adaptive	0.779082
Non-adaptive	0.762868
Non-adaptive	0.788597
Non-adaptive	0.726195
Non-adaptive	0.743688
Non-adaptive	0.832301
Non-adaptive	0.772547
Non-adaptive	0.736724
Non-adaptive	0.724952
Non-adaptive	0.853924
Non-adaptive	0.793385
Non-adaptive	0.707192
Non-adaptive	0.796899
Non-adaptive	0.863608
Non-adaptive	0.770447
Non-adaptive	0.873813
Non-adaptive	0.799753
Non-adaptive	0.903378
Non-adaptive	0.787188
Non-adaptive	0.857729
Non-adaptive	0.906207
Non-adaptive	0.805033
Non-adaptive	0.780623
Non-adaptive	0.767023
Non-adaptive	0.737339
Non-adaptive	0.830208
Non-adaptive	0.741865
Non-adaptive	0.750595
Non-adaptive	0.834905
Non-adaptive	0.814717
Non-adaptive	0.89151
Non-adaptive	0.906645
Non-adaptive	0.779767
Non-adaptive	0.821068
Non-adaptive	0.818607
Non-adaptive	0.794025
Non-adaptive	0.82932
Non-adaptive	0.837241
Non-adaptive	0.883722
Non-adaptive	0.820282
Non-adaptive	0.846568
Non-adaptive	0.748758
Non-adaptive	0.798315
Non-adaptive	0.847928
Non-adaptive	0.802213
Non-adaptive	0.78967
Non-adaptive	0.845043
Non-adaptive	0.773288
Non-adaptive	0.827264
Non-adaptive	0.759956
Non-adaptive	0.794618
Non-adaptive	0.793688
Non-adaptive	0.774161
Non-adaptive	0.78396
Non-adaptive	0.809351
Non-adaptive	0.630912
Non-adaptive	0.791339
Non-adaptive	0.751983
Non-adaptive	0.813482
Non-adaptive	0.837918
Non-adaptive	0.806013
Non-adaptive	0.80705
Non-adaptive	0.820453
Non-adaptive	0.783756
Non-adaptive	0.71277
Non-adaptive	0.867701
Non-adaptive	0.891975
Non-adaptive	0.847361
Non-adaptive	0.740286
Non-adaptive	0.796697
Non-adaptive	0.758859
Non-adaptive	0.808479
Non-adaptive	0.891094
Non-adaptive	0.764584
Non-adaptive	0.81173
Non-adaptive	0.86645
Non-adaptive	0.779041
Non-adaptive	0.882805
Non-adaptive	0.896637
Non-adaptive	0.810268
Non-adaptive	0.760822
Non-adaptive	0.873354
Non-adaptive	0.837313
Non-adaptive	0.767417
Non-adaptive	0.797093
Non-adaptive	0.841975
Non-adaptive	0.770508
Non-adaptive	0.806799
Non-adaptive	0.773244
Non-adaptive	0.844112
Non-adaptive	0.843977
Non-adaptive	0.79365
Non-adaptive	0.739289
Non-adaptive	0.799488
Non-adaptive	0.785484
Non-adaptive	0.82355
Non-adaptive	0.782395
Non-adaptive	0.788367
Non-adaptive	0.874211
Non-adaptive	0.777477
Non-adaptive	0.740212
Non-adaptive	0.718909
Non-adaptive	0.868588
Non-adaptive	0.730796
Non-adaptive	0.816811
Non-adaptive	0.728456
Non-adaptive	0.737882
Non-adaptive	0.85045
Non-adaptive	0.820821
Non-adaptive	0.728879
Non-adaptive	0.824156
Non-adaptive	0.877954
Non-adaptive	0.825608
Non-adaptive	0.802267
Non-adaptive	0.747841
Non-adaptive	0.843286
Non-adaptive	0.842323
Non-adaptive	0.778374
Non-adaptive	0.79964
Non-adaptive	0.809029
Non-adaptive	0.77896
Non-adaptive	0.819731
Non-adaptive	0.762565
Non-adaptive	0.841632
Non-adaptive	0.881225
Non-adaptive	0.769014
Non-adaptive	0.863849
Non-adaptive	0.816886
Non-adaptive	0.766279
Non-adaptive	0.795101
Non-adaptive	0.815142
Non-adaptive	0.783309
Non-adaptive	0.879173
Non-adaptive	0.720482
Non-adaptive	0.838671
Non-adaptive	0.849288
Non-adaptive	0.853631
Non-adaptive	0.890386
Non-adaptive	0.84153
Non-adaptive	0.911572
Non-adaptive	0.759528
Non-adaptive	0.7922
Non-adaptive	0.773598
Non-adaptive	0.738369
Non-adaptive	0.818854
Non-adaptive	0.85422
Non-adaptive	0.80787
Non-adaptive	0.85083
Non-adaptive	0.827152
Non-adaptive	0.848203
Non-adaptive	0.775134
Non-adaptive	0.764714
Non-adaptive	0.826727
Non-adaptive	0.835171
Non-adaptive	0.800867
Non-adaptive	0.911272
Non-adaptive	0.790696
Non-adaptive	0.790485
Non-adaptive	0.782602
Non-adaptive	0.754863
Non-adaptive	0.842829
Non-adaptive	0.764412
Non-adaptive	0.791474
Non-adaptive	0.777694
Non-adaptive	0.823925
Non-adaptive	0.848931
Non-adaptive	0.755747
Non-adaptive	0.886439
Non-adaptive	0.838038
Non-adaptive	0.739509
Non-adaptive	0.859608
Non-adaptive	0.838579
Non-adaptive	0.772666
Non-adaptive	0.773056
Non-adaptive	0.87363
Non-adaptive	0.825882
Non-adaptive	0.806835
Non-adaptive	0.855513
Non-adaptive	0.832414
Non-adaptive	0.776413
Non-adaptive	0.749312
Non-adaptive	0.857505
Non-adaptive	0.799894
Non-adaptive	0.809983
Non-adaptive	0.838159
Non-adaptive	0.840719
Non-adaptive	0.788406
Non-adaptive	0.810351
Non-adaptive	0.908916
Non-adaptive	0.683943
Non-adaptive	0.807692
Non-adaptive	0.900887
Non-adaptive	0.754709
Non-adaptive	0.754753
Non-adaptive	0.85746
Non-adaptive	0.735929
Non-adaptive	0.8598
Non-adaptive	0.86042
Non-adaptive	0.811027
Non-adaptive	0.772042
Non-adaptive	0.790827
Non-adaptive	0.780767
Non-adaptive	0.804926
Non-adaptive	0.807474
Non-adaptive	0.829958
Non-adaptive	0.799851
Non-adaptive	0.784365
Non-adaptive	0.851488
Non-adaptive	0.816064
Non-adaptive	0.761305
Non-adaptive	0.763301
Non-adaptive	0.780386
Non-adaptive	0.869245
Non-adaptive	0.841149
Non-adaptive	0.805012
Non-adaptive	0.822388
Non-adaptive	0.817343
Non-adaptive	0.811837
Non-adaptive	0.772601
Non-adaptive	0.79103
Non-adaptive	0.796289
Non-adaptive	0.768578
Non-adaptive	0.769779
Non-adaptive	0.830753
Non-adaptive	0.852124
Non-adaptive	0.810922
Non-adaptive	0.759342
Non-adaptive	0.772038
Non-adaptive	0.806735
Non-adaptive	0.845657
Non-adaptive	0.826145
Non-adaptive	0.773181
Non-adaptive	0.894274
Non-adaptive	0.796078
Non-adaptive	0.821769
Non-adaptive	0.821625
Non-adaptive	0.799127
Non-adaptive	0.807429
Non-adaptive	0.843024
Non-adaptive	0.781814
Non-adaptive	0.840589
Non-adaptive	0.849229
Non-adaptive	0.814955
Non-adaptive	0.824043
Non-adaptive	0.735127
Non-adaptive	0.827656
Non-adaptive	0.788035
Non-adaptive	0.79709
Non-adaptive	0.820342
Non-adaptive	0.805485
Non-adaptive	0.797791
Non-adaptive	0.825197
Non-adaptive	0.812931
Non-adaptive	0.815591
Non-adaptive	0.783318
Non-adaptive	0.785426
Non-adaptive	0.751909
Non-adaptive	0.789764
Non-adaptive	0.707073
Non-adaptive	0.830148
Non-adaptive	0.805128
Non-adaptive	0.82361
Non-adaptive	0.859075
Non-adaptive	0.795664
Non-adaptive	0.788778
Non-adaptive	0.819029
Non-adaptive	0.837331
Non-adaptive	0.746287
Non-adaptive	0.791583
Non-adaptive	0.903003
Non-adaptive	0.762975
Non-adaptive	0.756786
Non-adaptive	0.81057
Non-adaptive	0.82381
Non-adaptive	0.781545
Non-adaptive	0.88004
Non-adaptive	0.734171
Non-adaptive	0.808207
Non-adaptive	0.768891
Non-adaptive	0.834663
Non-adaptive	0.799106
Non-adaptive	0.847238
Non-adaptive	0.77073
Non-adaptive	0.825383
Non-adaptive	0.795599
Non-adaptive	0.800933
Non-adaptive	0.853921
Non-adaptive	0.832876
Non-adaptive	0.819592
Non-adaptive	0.826818
Non-adaptive	0.771203
Non-adaptive	0.816323
Non-adaptive	0.689616
Non-adaptive	0.784364
Non-adaptive	0.797858
Non-adaptive	0.818762
Non-adaptive	0.710874
Non-adaptive	0.787862
Non-adaptive	0.822914
Non-adaptive	0.779457
Non-adaptive	0.781305
Non-adaptive	0.842159
Non-adaptive	0.812817
Non-adaptive	0.84875
Non-adaptive	0.840058
Non-adaptive	0.797412
Non-adaptive	0.737978
Non-adaptive	0.816144
Non-adaptive	0.797171
Non-adaptive	0.785059
Non-adaptive	0.804521
Non-adaptive	0.782892
Non-adaptive	0.794151
Non-adaptive	0.864039
Non-adaptive	0.817557
Non-adaptive	0.854554
Non-adaptive	0.798155
Non-adaptive	0.766665
Non-adaptive	0.850456
Non-adaptive	0.811514
Non-adaptive	0.832705
Non-adaptive	0.773266
Non-adaptive	0.790275
Non-adaptive	0.821312
Non-adaptive	0.818203
Non-adaptive	0.812123
Non-adaptive	0.809536
Non-adaptive	0.888177
Non-adaptive	0.775402
Non-adaptive	0.820185
Non-adaptive	0.780055
Non-adaptive	0.865571
Non-adaptive	0.855296
Non-adaptive	0.840928
Non-adaptive	0.838142
Non-adaptive	0.809838
Non-adaptive	0.806201
Non-adaptive	0.796023
Non-adaptive	0.874042
Non-adaptive	0.764419
Non-adaptive	0.859935
Non-adaptive	0.783733
Non-adaptive	0.80992
Non-adaptive	0.826091
Non-adaptive	0.826812
Non-adaptive	0.784491
Non-adaptive	0.873949
Non-adaptive	0.781298
Non-adaptive	0.775809
Non-adaptive	0.826264
Non-adaptive	0.736116
Non-adaptive	0.78689
Non-adaptive	0.790939
Non-adaptive	0.785945
Non-adaptive	0.821888
Non-adaptive	0.741281
Non-adaptive	0.800023
Non-adaptive	0.862991
Non-adaptive	0.773786
Non-adaptive	0.869525
Non-adaptive	0.727853
Non-adaptive	0.752986
Non-adaptive	0.806915
Non-adaptive	0.876217
Non-adaptive	0.79658
Non-adaptive	0.768305
Non-adaptive	0.770731
Non-adaptive	0.787419
Non-adaptive	0.866139
Non-adaptive	0.82164
Non-adaptive	0.780074
Non-adaptive	0.835092
Non-adaptive	0.858364
Non-adaptive	0.755077
Non-adaptive	0.849798
Non-adaptive	0.802545
Non-adaptive	0.749727
Non-adaptive	0.737476
Non-adaptive	0.828758
Non-adaptive	0.83848
Non-adaptive	0.769863
Non-adaptive	0.863868
Non-adaptive	0.769213
Non-adaptive	0.776887
Non-adaptive	0.802651
Non-adaptive	0.793994
Non-adaptive	0.761497
Non-adaptive	0.818285
Non-adaptive	0.760892
Non-adaptive	0.821474
Non-adaptive	0.899743
Non-adaptive	0.856023
Non-adaptive	0.767233
Non-adaptive	0.793233
Non-adaptive	0.842451
Non-adaptive	0.830692
Non-adaptive	0.774064
Non-adaptive	0.849248
Non-adaptive	0.699346
Non-adaptive	0.821014
Non-adaptive	0.792307
Non-adaptive	0.825599
Non-adaptive	0.852922
Non-adaptive	0.808524
Non-adaptive	0.867527
Non-adaptive	0.790947
Non-adaptive	0.858574
Non-adaptive	0.818924
Non-adaptive	0.779895
Non-adaptive	0.785434
Non-adaptive	0.733647
Non-adaptive	0.890714
Non-adaptive	0.732944
Non-adaptive	0.763279
Non-adaptive	0.806492
Non-adaptive	0.693648
Non-adaptive	0.84085
Non-adaptive	0.760594
Non-adaptive	0.800098
Non-adaptive	0.83456
Non-adaptive	0.796154
Non-adaptive	0.66854
Non-adaptive	0.809259
Non-adaptive	0.882827
Non-adaptive	0.829628
Non-adaptive	0.783915
Non-adaptive	0.7468
Non-adaptive	0.76366
Non-adaptive	0.741888
Non-adaptive	0.775384
Non-adaptive	0.810179
Non-adaptive	0.828831
Non-adaptive	0.739203
Non-adaptive	0.753447
Non-adaptive	0.841746
Non-adaptive	0.827149
Non-adaptive	0.79512
Non-adaptive	0.851297
Non-adaptive	0.856769
Non-adaptive	0.87173
Non-adaptive	0.83614
Non-adaptive	0.796395
Non-adaptive	0.827719
Non-adaptive	0.831878
Non-adaptive	0.716884
Non-adaptive	0.776342
Non-adaptive	0.762608
Non-adaptive	0.752998
Non-adaptive	0.79547
Non-adaptive	0.903583
Non-adaptive	0.798258
Non-adaptive	0.82385
Non-adaptive	0.759421
Non-adaptive	0.80364
Non-adaptive	0.832126
Non-adaptive	0.814445
Non-adaptive	0.808662
Non-adaptive	0.754646
Non-adaptive	0.851283
Non-adaptive	0.766195
Non-adaptive	0.788087
Non-adaptive	0.817973
Non-adaptive	0.812851
Non-adaptive	0.851
Non-adaptive	0.813713
Non-adaptive	0.843499
Non-adaptive	0.806072
Non-adaptive	0.695296
Non-adaptive	0.843704
Non-adaptive	0.809097
Non-adaptive	0.732879
Non-adaptive	0.777851
Non-adaptive	0.747601
Non-adaptive	0.766117
Non-adaptive	0.746609
Non-adaptive	0.777811
Non-adaptive	0.783695
Non-adaptive	0.806192
Non-adaptive	0.850849
Non-adaptive	0.790086
Non-adaptive	0.835688
Non-adaptive	0.78972
Non-adaptive	0.80716
Non-adaptive	0.800641
Non-adaptive	0.809102
Non-adaptive	0.79305
Non-adaptive	0.803562
Non-adaptive	0.849234
Non-adaptive	0.759108
Non-adaptive	0.86171
Non-adaptive	0.834371
Non-adaptive	0.839433
Non-adaptive	0.804932
Non-adaptive	0.742947
Non-adaptive	0.882462
Non-adaptive	0.816836
Non-adaptive	0.777499
Non-adaptive	0.842039
Non-adaptive	0.709791
Non-adaptive	0.789415
Non-adaptive	0.80449
Non-adaptive	0.8132
Non-adaptive	0.815791
Non-adaptive	0.806856
Non-adaptive	0.800751
Non-adaptive	0.762545
Non-adaptive	0.83118
Non-adaptive	0.75406
Non-adaptive	0.778921
Non-adaptive	0.812746
Non-adaptive	0.83789
Non-adaptive	0.833198
Non-adaptive	0.733279
Non-adaptive	0.823024
Non-adaptive	0.733588
Non-adaptive	0.774588
Non-adaptive	0.798828
Non-adaptive	0.768038
Non-adaptive	0.785567
Non-adaptive	0.770266
Non-adaptive	0.819499
Non-adaptive	0.782542
Non-adaptive	0.807512
Non-adaptive	0.807588
Non-adaptive	0.790991
Non-adaptive	0.777371
Non-adaptive	0.766884
Non-adaptive	0.861364
Non-adaptive	0.805061
Non-adaptive	0.799714
Non-adaptive	0.832527
Non-adaptive	0.80582
Non-adaptive	0.805197
Non-adaptive	0.782397
Non-adaptive	0.812249
Non-adaptive	0.865985
Non-adaptive	0.806792
Non-adaptive	0.816158
Non-adaptive	0.869217
Non-adaptive	0.789316
Non-adaptive	0.722146
Non-adaptive	0.785283
Non-adaptive	0.793154
Non-adaptive	0.777445
Non-adaptive	0.798525
Non-adaptive	0.774783
Non-adaptive	0.770087
Non-adaptive	0.919301
Non-adaptive	0.823648
Non-adaptive	0.801276
Non-adaptive	0.814342
Non-adaptive	0.732645
Non-adaptive	0.7837
Non-adaptive	0.840762
Non-adaptive	0.754573
Non-adaptive	0.769996
Non-adaptive	0.765228
Non-adaptive	0.780182
Non-adaptive	0.779211
Non-adaptive	0.78996
Non-adaptive	0.715889
Non-adaptive	0.802507
Non-adaptive	0.791875
Non-adaptive	0.812003
Non-adaptive	0.68569
Non-adaptive	0.82216
Non-adaptive	0.854711
Non-adaptive	0.870397
Non-adaptive	0.850917
Non-adaptive	0.797151
Non-adaptive	0.744967
Non-adaptive	0.776492
Non-adaptive	0.866637
Non-adaptive	0.865732
Non-adaptive	0.80664
Non-adaptive	0.74849
Non-adaptive	0.774194
Non-adaptive	0.840617
Non-adaptive	0.892589
Non-adaptive	0.843747
Non-adaptive	0.896702
Non-adaptive	0.857232
Non-adaptive	0.800671
Non-adaptive	0.849812
Non-adaptive	0.791379
Non-adaptive	0.841589
Non-adaptive	0.873984
Non-adaptive	0.767746
Non-adaptive	0.70008
Non-adaptive	0.746219
Non-adaptive	0.838546
Non-adaptive	0.898291
Non-adaptive	0.738972
Non-adaptive	0.845676
Non-adaptive	0.839076
Non-adaptive	0.80462
Non-adaptive	0.813096
Non-adaptive	0.733084
Non-adaptive	0.745462
Non-adaptive	0.825874
Non-adaptive	0.786483
Non-adaptive	0.826287
Non-adaptive	0.833832
Non-adaptive	0.796899
Non-adaptive	0.83424
Non-adaptive	0.76285
Non-adaptive	0.789251
Non-adaptive	0.840967
Non-adaptive	0.733471
Non-adaptive	0.73103
Non-adaptive	0.799367
Non-adaptive	0.743832
Non-adaptive	0.849029
Non-adaptive	0.815915
Non-adaptive	0.836839
Non-adaptive	0.815778
Non-adaptive	0.830659
Non-adaptive	0.813401
Non-adaptive	0.808315
Non-adaptive	0.872804
Non-adaptive	0.84884
Non-adaptive	0.790494
Non-adaptive	0.84553
Non-adaptive	0.880369
Non-adaptive	0.836132
Non-adaptive	0.750208
Non-adaptive	0.841904
Non-adaptive	0.790053
Non-adaptive	0.809774
Non-adaptive	0.803479
Non-adaptive	0.845375
Non-adaptive	0.777109
Non-adaptive	0.895915
Non-adaptive	0.846771
Non-adaptive	0.742785
Non-adaptive	0.808506
Non-adaptive	0.846929
Non-adaptive	0.804178
Non-adaptive	0.871183
Non-adaptive	0.839628
Non-adaptive	0.851986
Non-adaptive	0.875926
Non-adaptive	0.744392
Non-adaptive	0.749323
Non-adaptive	0.789354
Non-adaptive	0.839395
Non-adaptive	0.863974
Non-adaptive	0.750416
Non-adaptive	0.808537
Non-adaptive	0.819138
Non-adaptive	0.821338
Non-adaptive	0.861044
Non-adaptive	0.82577
Non-adaptive	0.774258
Non-adaptive	0.725331
Non-adaptive	0.82321
Non-adaptive	0.84498
Non-adaptive	0.725412
Non-adaptive	0.805048
Non-adaptive	0.751093
Non-adaptive	0.760431
Non-adaptive	0.675
Non-adaptive	0.846112
Non-adaptive	0.823667
Non-adaptive	0.758469
Non-adaptive	0.805617
Non-adaptive	0.790438
Non-adaptive	0.787648
Non-adaptive	0.872952
Non-adaptive	0.83795
Non-adaptive	0.831698
Non-adaptive	0.713547
Non-adaptive	0.723209
Non-adaptive	0.80813
Non-adaptive	0.84867
Non-adaptive	0.766391
Non-adaptive	0.704173
Non-adaptive	0.77139
Non-adaptive	0.819623
Non-adaptive	0.729695
Non-adaptive	0.854658
Non-adaptive	0.801505
Non-adaptive	0.759472
Non-adaptive	0.769115
Non-adaptive	0.763775
Non-adaptive	0.826786
Non-adaptive	0.767166
Non-adaptive	0.779651
Non-adaptive	0.830346
Non-adaptive	0.792845
Non-adaptive	0.695266
Non-adaptive	0.800016
Non-adaptive	0.81436
Non-adaptive	0.866408
Non-adaptive	0.740581
Non-adaptive	0.762916
Non-adaptive	0.782197
Non-adaptive	0.867642
Non-adaptive	0.812633
Non-adaptive	0.838958
Non-adaptive	0.888627
Non-adaptive	0.747585
Non-adaptive	0.740441
Non-adaptive	0.74382
Non-adaptive	0.800823
Non-adaptive	0.833825
Non-adaptive	0.794016
Non-adaptive	0.843194
Non-adaptive	0.804757
Non-adaptive	0.740946
Non-adaptive	0.730179
Non-adaptive	0.8411
Non-adaptive	0.851692
Non-adaptive	0.758882
Non-adaptive	0.803103
Non-adaptive	0.79147
Non-adaptive	0.83367
Non-adaptive	0.775645
Non-adaptive	0.79819
Non-adaptive	0.833411
Non-adaptive	0.882884
Non-adaptive	0.79636
Non-adaptive	0.866103
Non-adaptive	0.79178
Non-adaptive	0.792424
Non-adaptive	0.810832
Non-adaptive	0.753393
Non-adaptive	0.83885
Non-adaptive	0.775303
Non-adaptive	0.822276
Non-adaptive	0.73008
Non-adaptive	0.850627
Non-adaptive	0.803835
Non-adaptive	0.860273
Non-adaptive	0.784076
Non-adaptive	0.828966
Non-adaptive	0.819006
Non-adaptive	0.798838
Non-adaptive	0.848853
Non-adaptive	0.870773
Non-adaptive	0.87078
Non-adaptive	0.782229
Non-adaptive	0.863695
Non-adaptive	0.85464
Non-adaptive	0.773942
Non-adaptive	0.856718
Non-adaptive	0.848738
Non-adaptive	0.771368
Non-adaptive	0.78223
Non-adaptive	0.76376
Non-adaptive	0.860667
Non-adaptive	0.738657
Non-adaptive	0.863741
Non-adaptive	0.782831
Non-adaptive	0.790127
Non-adaptive	0.851178
Non-adaptive	0.801608
Non-adaptive	0.804215
Non-adaptive	0.630919
Non-adaptive	0.835448
Non-adaptive	0.66757
Non-adaptive	0.843868
Non-adaptive	0.752493
Non-adaptive	0.84523
Non-adaptive	0.780275
Non-adaptive	0.785863
Non-adaptive	0.799699
Non-adaptive	0.774334
Non-adaptive	0.872682
Non-adaptive	0.798181
Non-adaptive	0.815834
Non-adaptive	0.730897
Non-adaptive	0.797282
Non-adaptive	0.68515
Non-adaptive	0.832452
Non-adaptive	0.76804
Non-adaptive	0.828143
Non-adaptive	0.839859
Non-adaptive	0.840284
Non-adaptive	0.835649
Non-adaptive	0.81348
Non-adaptive	0.826643
Non-adaptive	0.760126
Non-adaptive	0.764878
Non-adaptive	0.808877
Non-adaptive	0.745452
Non-adaptive	0.763777
Non-adaptive	0.837268
Non-adaptive	0.884979
Non-adaptive	0.807684
Non-adaptive	0.85786
Non-adaptive	0.821595
Non-adaptive	0.803551
Non-adaptive	0.853146
Non-adaptive	0.766354
Non-adaptive	0.850836
Non-adaptive	0.854137
Non-adaptive	0.800407
Non-adaptive	0.809157
Non-adaptive	0.779186
Non-adaptive	0.872431
Non-adaptive	0.763405
Non-adaptive	0.733182
Non-adaptive	0.815833
Non-adaptive	0.789715
Non-adaptive	0.685405
Non-adaptive	0.735209
Non-adaptive	0.862744
Non-adaptive	0.713969
Non-adaptive	0.733164
Non-adaptive	0.849046
Non-adaptive	0.798446
Non-adaptive	0.837388
Non-adaptive	0.721517
Non-adaptive	0.781771
Non-adaptive	0.739019
Non-adaptive	0.821994
Non-adaptive	0.830784
Non-adaptive	0.842887
Non-adaptive	0.756254
Non-adaptive	0.814233
Non-adaptive	0.876373
Non-adaptive	0.860512
Non-adaptive	0.833605
Non-adaptive	0.787162
Non-adaptive	0.736984
Non-adaptive	0.80328
Non-adaptive	0.721145
Non-adaptive	0.835417
Non-adaptive	0.851477
Non-adaptive	0.825693
Non-adaptive	0.839561
Non-adaptive	0.830305
Non-adaptive	0.770206
Non-adaptive	0.822877
Non-adaptive	0.770279
Non-adaptive	0.781994
Non-adaptive	0.750796
Non-adaptive	0.721672
Non-adaptive	0.765728
Non-adaptive	0.810137
Non-adaptive	0.844732
Non-adaptive	0.735478
Non-adaptive	0.682653
Non-adaptive	0.824478
Non-adaptive	0.820513
Non-adaptive	0.767423
Non-adaptive	0.800986
Non-adaptive	0.741782
Non-adaptive	0.766634
Non-adaptive	0.872976
Non-adaptive	0.817842
Non-adaptive	0.770936
Non-adaptive	0.807256
Non-adaptive	0.829896
Non-adaptive	0.836147
Non-adaptive	0.825166
Non-adaptive	0.813389
Non-adaptive	0.734043
Non-adaptive	0.828388
Non-adaptive	0.742675
Non-adaptive	0.78564
Non-adaptive	0.804919
Non-adaptive	0.783549
Non-adaptive	0.779419
Non-adaptive	0.835317
Non-adaptive	0.733607
Non-adaptive	0.779894
Non-adaptive	0.741259
Non-adaptive	0.880237
Non-adaptive	0.855846
Non-adaptive	0.792192
Non-adaptive	0.774042
Non-adaptive	0.783226
Non-adaptive	0.799028
Non-adaptive	0.841516
Non-adaptive	0.764323
Non-adaptive	0.85871
Non-adaptive	0.796092
Non-adaptive	0.851242
Non-adaptive	0.856445
Non-adaptive	0.793597
Non-adaptive	0.785722
Non-adaptive	0.738571
Non-adaptive	0.811842
Non-adaptive	0.840633
Non-adaptive	0.756031
Non-adaptive	0.805837
Non-adaptive	0.737397
Non-adaptive	0.719694
Non-adaptive	0.777099
Non-adaptive	0.7994
Non-adaptive	0.822595
Non-adaptive	0.809567
Non-adaptive	0.778534
Non-adaptive	0.832198
Non-adaptive	0.731684
Non-adaptive	0.820847
Non-adaptive	0.825383
Non-adaptive	0.799549
Non-adaptive	0.749986
Non-adaptive	0.764992
Non-adaptive	0.809732
Non-adaptive	0.771075
Non-adaptive	0.803495
Non-adaptive	0.724848
Non-adaptive	0.824882
Non-adaptive	0.814779
Non-adaptive	0.742441
Non-adaptive	0.814168
Non-adaptive	0.74329
Non-adaptive	0.758471
Non-adaptive	0.78864
Non-adaptive	0.764081
Non-adaptive	0.829781
Non-adaptive	0.831066
Non-adaptive	0.826392
Non-adaptive	0.816893
Non-adaptive	0.848284
Non-adaptive	0.819429
Non-adaptive	0.745141
Non-adaptive	0.860001
Non-adaptive	0.699638
Non-adaptive	0.701792
Non-adaptive	0.806856
Non-adaptive	0.820738
Non-adaptive	0.808336
Non-adaptive	0.782429
Non-adaptive	0.777155
Non-adaptive	0.856622
Non-adaptive	0.775426
Non-adaptive	0.825041
Non-adaptive	0.748971
Non-adaptive	0.866372
Non-adaptive	0.845204
Non-adaptive	0.794447
Non-adaptive	0.892608
Non-adaptive	0.788142
Non-adaptive	0.777822
Non-adaptive	0.827011
Non-adaptive	0.786646
Non-adaptive	0.747235
Non-adaptive	0.869616
Non-adaptive	0.906727
Non-adaptive	0.820886
Non-adaptive	0.852254
Non-adaptive	0.805491
Non-adaptive	0.842438
Non-adaptive	0.824086
Non-adaptive	0.822691
Non-adaptive	0.774759
Non-adaptive	0.832007
Non-adaptive	0.803412
Non-adaptive	0.854094
Non-adaptive	0.871991
Non-adaptive	0.727265
Non-adaptive	0.785216
Non-adaptive	0.868459
Non-adaptive	0.767402
Non-adaptive	0.71693
Non-adaptive	0.873205
Non-adaptive	0.839153
Non-adaptive	0.744485
Non-adaptive	0.750246
Non-adaptive	0.767185
Non-adaptive	0.770484
Non-adaptive	0.835488
Non-adaptive	0.800655
Non-adaptive	0.832773
Non-adaptive	0.894692
Non-adaptive	0.77632
Non-adaptive	0.806541
Non-adaptive	0.788795
Non-adaptive	0.830491
Non-adaptive	0.819576
Non-adaptive	0.833289
Non-adaptive	0.797245
Non-adaptive	0.823381
Non-adaptive	0.744802
Non-adaptive	0.876489
Non-adaptive	0.779093
Non-adaptive	0.7557
Non-adaptive	0.819343
Non-adaptive	0.775671
Non-adaptive	0.817295
Non-adaptive	0.88134
Non-adaptive	0.738571
Non-adaptive	0.86338
Non-adaptive	0.831542
Non-adaptive	0.828536
Non-adaptive	0.757131
Non-adaptive	0.756645
Non-adaptive	0.689759
Non-adaptive	0.750899
Non-adaptive	0.788415
Non-adaptive	0.842468
Non-adaptive	0.713462
Non-adaptive	0.832412
Non-adaptive	0.846001
Non-adaptive	0.783481
Non-adaptive	0.687091
Non-adaptive	0.787873
Non-adaptive	0.840551
Non-adaptive	0.770339
Non-adaptive	0.767582
Non-adaptive	0.804585
Non-adaptive	0.791713
Non-adaptive	0.814127
Non-adaptive	0.868161
Non-adaptive	0.871044
Non-adaptive	0.835011
Non-adaptive	0.818681
Non-adaptive	0.754759
Non-adaptive	0.761104
Non-adaptive	0.797506
Non-adaptive	0.846535
Non-adaptive	0.793641
Non-adaptive	0.771713
Non-adaptive	0.847688
Non-adaptive	0.851576
Non-adaptive	0.788532
Non-adaptive	0.716652
Non-adaptive	0.779114
Non-adaptive	0.80652
Non-adaptive	0.865853
Non-adaptive	0.799901
Non-adaptive	0.768391
Non-adaptive	0.776651
Non-adaptive	0.86995
Non-adaptive	0.858383
Non-adaptive	0.839864
Non-adaptive	0.818059
Non-adaptive	0.765209
Non-adaptive	0.807309
Non-adaptive	0.821969
Non-adaptive	0.77447
Non-adaptive	0.726341
Non-adaptive	0.838901
Non-adaptive	0.84729
Non-adaptive	0.857019
Non-adaptive	0.81997
Non-adaptive	0.762123
Non-adaptive	0.708972
Non-adaptive	0.766886
Non-adaptive	0.838318
Non-adaptive	0.8038
Non-adaptive	0.789015
Non-adaptive	0.786316
Non-adaptive	0.789231
Non-adaptive	0.77202
Non-adaptive	0.793676
Non-adaptive	0.821229
Non-adaptive	0.748309
Non-adaptive	0.835249
Non-adaptive	0.79869
Non-adaptive	0.812449
Non-adaptive	0.80547
Non-adaptive	0.784297
Non-adaptive	0.800891
Non-adaptive	0.763391
Non-adaptive	0.769743
Non-adaptive	0.809186
Non-adaptive	0.708494
Non-adaptive	0.836474
Non-adaptive	0.7628
Non-adaptive	0.774016
Non-adaptive	0.817956
Non-adaptive	0.859468
Non-adaptive	0.803934
Non-adaptive	0.752809
Non-adaptive	0.831139
Non-adaptive	0.766109
Non-adaptive	0.802081
Non-adaptive	0.783448
Non-adaptive	0.840882
Non-adaptive	0.812969
Non-adaptive	0.834201
Non-adaptive	0.791642
Non-adaptive	0.749431
Non-adaptive	0.854933
Non-adaptive	0.793849
Non-adaptive	0.806879
Non-adaptive	0.82917
Non-adaptive	0.789777
Non-adaptive	0.858796
Non-adaptive	0.865112
Non-adaptive	0.74814
Non-adaptive	0.855463
Non-adaptive	0.812568
Non-adaptive	0.790238
Non-adaptive	0.831041
Non-adaptive	0.765427
Non-adaptive	0.850739
Non-adaptive	0.810397
Non-adaptive	0.723871
Non-adaptive	0.82586
Non-adaptive	0.876994
Non-adaptive	0.786436
Non-adaptive	0.745522
Non-adaptive	0.779052
Non-adaptive	0.769526
Non-adaptive	0.763452
Non-adaptive	0.833418
Non-adaptive	0.726112
Non-adaptive	0.751482
Non-adaptive	0.765088
Non-adaptive	0.788847
Non-adaptive	0.762413
Non-adaptive	0.861416
Non-adaptive	0.873189
Non-adaptive	0.833314
Non-adaptive	0.761566
Non-adaptive	0.818805
Non-adaptive	0.725876
Non-adaptive	0.768595
Non-adaptive	0.731915
Non-adaptive	0.74905
Non-adaptive	0.840432
Non-adaptive	0.817618
Non-adaptive	0.7801
Non-adaptive	0.73084
Non-adaptive	0.825169
Non-adaptive	0.781796
Non-adaptive	0.798242
Non-adaptive	0.738927
Non-adaptive	0.868896
Non-adaptive	0.843223
Non-adaptive	0.78091
Non-adaptive	0.744418
Non-adaptive	0.763864
Non-adaptive	0.803834
Non-adaptive	0.739683
Non-adaptive	0.851455
Non-adaptive	0.792378
Non-adaptive	0.866414
Non-adaptive	0.747433
Non-adaptive	0.827158
Non-adaptive	0.778509
Non-adaptive	0.817006
Non-adaptive	0.795928
Non-adaptive	0.820337
Non-adaptive	0.803598
Non-adaptive	0.734168
Non-adaptive	0.784493
Non-adaptive	0.83673
Non-adaptive	0.766517
Non-adaptive	0.866491
Non-adaptive	0.794824
Non-adaptive	0.74086
Non-adaptive	0.770522
Non-adaptive	0.737703
Non-adaptive	0.796023
Non-adaptive	0.826856
Non-adaptive	0.807861
Non-adaptive	0.802609
Non-adaptive	0.778903
Non-adaptive	0.849747
Non-adaptive	0.803598
Non-adaptive	0.841037
Non-adaptive	0.844405
Non-adaptive	0.75776
Non-adaptive	0.879715
Non-adaptive	0.829754
Non-adaptive	0.746056
Non-adaptive	0.811635
Non-adaptive	0.82452
Non-adaptive	0.732297
Non-adaptive	0.802444
Non-adaptive	0.804013
Non-adaptive	0.745995
Non-adaptive	0.841621
Non-adaptive	0.819173
Non-adaptive	0.819123
Non-adaptive	0.747035
Non-adaptive	0.877629
Non-adaptive	0.756268
Non-adaptive	0.850672
Non-adaptive	0.822698
Non-adaptive	0.723423
Non-adaptive	0.857405
Non-adaptive	0.798555
Non-adaptive	0.882796
Non-adaptive	0.883126
Non-adaptive	0.862412
Non-adaptive	0.718268
Non-adaptive	0.781984
Non-adaptive	0.735064
Non-adaptive	0.842636
Non-adaptive	0.784258
Non-adaptive	0.850086
Non-adaptive	0.849506
Non-adaptive	0.79524
Non-adaptive	0.824873
Non-adaptive	0.800296
Non-adaptive	0.848351
Non-adaptive	0.810252
Non-adaptive	0.814056
Non-adaptive	0.790724
Non-adaptive	0.859171
Non-adaptive	0.781803
Non-adaptive	0.768321
Non-adaptive	0.819648
Non-adaptive	0.794511
Non-adaptive	0.767677
Non-adaptive	0.740442
Non-adaptive	0.776206
Non-adaptive	0.748274
Non-adaptive	0.806319
Non-adaptive	0.80727
Non-adaptive	0.800613
Non-adaptive	0.759508
Non-adaptive	0.812321
Non-adaptive	0.83036
Non-adaptive	0.851794
Non-adaptive	0.736498
Non-adaptive	0.787387
Non-adaptive	0.752869
Non-adaptive	0.771069
Non-adaptive	0.7815
Non-adaptive	0.724071
Non-adaptive	0.865799
Non-adaptive	0.707333
Non-adaptive	0.800919
Non-adaptive	0.812416
Non-adaptive	0.807677
Non-adaptive	0.858735
Non-adaptive	0.860783
Non-adaptive	0.835949
Non-adaptive	0.830604
Non-adaptive	0.732994
Non-adaptive	0.807303
Non-adaptive	0.853432
Non-adaptive	0.819475
Non-adaptive	0.801655
Non-adaptive	0.75426
Non-adaptive	0.829822
Non-adaptive	0.773823
Non-adaptive	0.773153
Non-adaptive	0.730871
Non-adaptive	0.866586
Non-adaptive	0.806671
Non-adaptive	0.811805
Non-adaptive	0.790638
Non-adaptive	0.840866
Non-adaptive	0.714987
Non-adaptive	0.791164
Non-adaptive	0.863077
Non-adaptive	0.779939
Non-adaptive	0.764522
Non-adaptive	0.821704
Non-adaptive	0.855822
Non-adaptive	0.739979
Non-adaptive	0.739984
Non-adaptive	0.723446
Non-adaptive	0.819136
Non-adaptive	0.796075
Non-adaptive	0.828548
Non-adaptive	0.842102
Non-adaptive	0.756102
Non-adaptive	0.840308
Non-adaptive	0.846365
Non-adaptive	0.79985
Non-adaptive	0.785771
Non-adaptive	0.754439
Non-adaptive	0.838269
Non-adaptive	0.830273
Non-adaptive	0.715476
Non-adaptive	0.814693
Non-adaptive	0.833106
Non-adaptive	0.81617
Non-adaptive	0.821726
Non-adaptive	0.717248
Non-adaptive	0.804698
Non-adaptive	0.768835
Non-adaptive	0.796199
Non-adaptive	0.794635
Non-adaptive	0.79289
Non-adaptive	0.827587
Non-adaptive	0.770043
Non-adaptive	0.748247
Non-adaptive	0.783332
Non-adaptive	0.833584
Non-adaptive	0.72308
Non-adaptive	0.778076
Non-adaptive	0.818293
Non-adaptive	0.660201
Non-adaptive	0.829588
Non-adaptive	0.725039
Non-adaptive	0.827381
Non-adaptive	0.7736
Non-adaptive	0.843543
Non-adaptive	0.721248
Non-adaptive	0.743512
Non-adaptive	0.753073
Non-adaptive	0.849482
Non-adaptive	0.777259
Non-adaptive	0.837005
Non-adaptive	0.737383
Non-adaptive	0.782925
Non-adaptive	0.809513
Non-adaptive	0.79999
Non-adaptive	0.731445
Non-adaptive	0.81987
Non-adaptive	0.814766
Non-adaptive	0.76531
Non-adaptive	0.794242
Non-adaptive	0.795069
Non-adaptive	0.797317
Non-adaptive	0.763379
Non-adaptive	0.762188
Non-adaptive	0.775205
Non-adaptive	0.856761
Non-adaptive	0.779435
Non-adaptive	0.718994
Non-adaptive	0.7425
Non-adaptive	0.795133
Non-adaptive	0.797672
Non-adaptive	0.659685
Non-adaptive	0.73819
Non-adaptive	0.785873
Non-adaptive	0.898748
Non-adaptive	0.7499
Non-adaptive	0.848363
Non-adaptive	0.765955
Non-adaptive	0.723846
Non-adaptive	0.8278
Non-adaptive	0.854473
Non-adaptive	0.735265
Non-adaptive	0.755145
Non-adaptive	0.782413
Non-adaptive	0.769963
Non-adaptive	0.798108
Non-adaptive	0.808867
Non-adaptive	0.774043
Non-adaptive	0.817999
Non-adaptive	0.839025
Non-adaptive	0.83481
Non-adaptive	0.810618
Non-adaptive	0.813265
Non-adaptive	0.781661
Non-adaptive	0.744047
Non-adaptive	0.81632
Non-adaptive	0.762192
Non-adaptive	0.888396
Non-adaptive	0.813535
Non-adaptive	0.779229
Non-adaptive	0.782745
Non-adaptive	0.848429
Non-adaptive	0.764705
Non-adaptive	0.834964
Non-adaptive	0.788542
Non-adaptive	0.750397
Non-adaptive	0.826267
Non-adaptive	0.690105
Non-adaptive	0.760028
Non-adaptive	0.828078
Non-adaptive	0.809659
Non-adaptive	0.81003
Non-adaptive	0.787254
Non-adaptive	0.847426
Non-adaptive	0.837718
Non-adaptive	0.856795
Non-adaptive	0.782683
Non-adaptive	0.840512
Non-adaptive	0.754924
Non-adaptive	0.75724
Non-adaptive	0.820901
Non-adaptive	0.890267
Non-adaptive	0.877388
Non-adaptive	0.87233
Non-adaptive	0.851724
Non-adaptive	0.803424
Non-adaptive	0.770986
Non-adaptive	0.810007
Non-adaptive	0.835926
Non-adaptive	0.757682
Non-adaptive	0.761934
Non-adaptive	0.852186
Non-adaptive	0.825718
Non-adaptive	0.78068
Non-adaptive	0.787593
Non-adaptive	0.847445
Non-adaptive	0.755822
Non-adaptive	0.725662
Non-adaptive	0.826578
Non-adaptive	0.811802
Non-adaptive	0.777104
Non-adaptive	0.731609
Non-adaptive	0.766245
Non-adaptive	0.777749
Non-adaptive	0.866211
Non-adaptive	0.864327
Non-adaptive	0.892124
Non-adaptive	0.892799
Non-adaptive	0.796697
Non-adaptive	0.851897
Non-adaptive	0.753523
Non-adaptive	0.823661
Non-adaptive	0.686514
Non-adaptive	0.835339
Non-adaptive	0.845873
Non-adaptive	0.867083
Non-adaptive	0.799603
Non-adaptive	0.777783
Non-adaptive	0.707647
Non-adaptive	0.815998
Non-adaptive	0.829656
Non-adaptive	0.79292
Non-adaptive	0.774041
Non-adaptive	0.76656
Non-adaptive	0.748449
Non-adaptive	0.807318
Non-adaptive	0.790424
Non-adaptive	0.801685
Non-adaptive	0.746111
Non-adaptive	0.805834
Non-adaptive	0.769287
Non-adaptive	0.818537
Non-adaptive	0.839374
Non-adaptive	0.799761
Non-adaptive	0.832416
Non-adaptive	0.779649
Non-adaptive	0.767625
Non-adaptive	0.781467
Non-adaptive	0.800794
Non-adaptive	0.836357
Non-adaptive	0.820107
Non-adaptive	0.814541
Non-adaptive	0.876467
Non-adaptive	0.847684
Non-adaptive	0.755355
Non-adaptive	0.652921
Non-adaptive	0.749779
Non-adaptive	0.790092
Non-adaptive	0.818938
Non-adaptive	0.796825
Non-adaptive	0.868316
Non-adaptive	0.685448
Non-adaptive	0.813065
Non-adaptive	0.867975
Non-adaptive	0.886118
Non-adaptive	0.768682
Non-adaptive	0.831409
Non-adaptive	0.764023
Non-adaptive	0.709719
Non-adaptive	0.852111
Non-adaptive	0.845704
Non-adaptive	0.758358
Non-adaptive	0.731896
Non-adaptive	0.844481
Non-adaptive	0.777777
Non-adaptive	0.756303
Non-adaptive	0.772977
Non-adaptive	0.841293
Non-adaptive	0.77235
Non-adaptive	0.837872
Non-adaptive	0.789324
Non-adaptive	0.831476
Non-adaptive	0.734798
Non-adaptive	0.781153
Non-adaptive	0.739454
Non-adaptive	0.753064
Non-adaptive	0.858622
Non-adaptive	0.820094
Non-adaptive	0.863557
Non-adaptive	0.853029
Non-adaptive	0.734564
Non-adaptive	0.817845
Non-adaptive	0.801021
Non-adaptive	0.820649
Non-adaptive	0.790903
Non-adaptive	0.866956
Non-adaptive	0.833535
Non-adaptive	0.825902
Non-adaptive	0.920342
Non-adaptive	0.797075
Non-adaptive	0.840631
Non-adaptive	0.786357
Non-adaptive	0.768964
Non-adaptive	0.737946
Non-adaptive	0.75561
Non-adaptive	0.824863
Non-adaptive	0.834555
Non-adaptive	0.813056
Non-adaptive	0.814584
Non-adaptive	0.811241
Non-adaptive	0.778665
Non-adaptive	0.815423
Non-adaptive	0.807886
Non-adaptive	0.832795
Non-adaptive	0.726286
Non-adaptive	0.810523
Non-adaptive	0.892767
Non-adaptive	0.861681
Non-adaptive	0.817561
Non-adaptive	0.803727
Non-adaptive	0.743569
Non-adaptive	0.780101
Non-adaptive	0.747929
Non-adaptive	0.749281
Non-adaptive	0.840185
Non-adaptive	0.805237
Non-adaptive	0.823743
Non-adaptive	0.76366
Non-adaptive	0.865451
Non-adaptive	0.815609
Non-adaptive	0.887008
Non-adaptive	0.79961
Non-adaptive	0.77602
Non-adaptive	0.872452
Non-adaptive	0.848966
Non-adaptive	0.730314
Non-adaptive	0.738018
Non-adaptive	0.725602
Non-adaptive	0.833281
Non-adaptive	0.829709
Non-adaptive	0.801252
Non-adaptive	0.802646
Non-adaptive	0.766547
Non-adaptive	0.827801
Non-adaptive	0.800215
Non-adaptive	0.76094
Non-adaptive	0.80201
Non-adaptive	0.81823
Non-adaptive	0.801224
Non-adaptive	0.798795
Non-adaptive	0.774264
Non-adaptive	0.847959
Non-adaptive	0.77926
Non-adaptive	0.754946
Non-adaptive	0.767357
Non-adaptive	0.83803
Non-adaptive	0.818558
Non-adaptive	0.788148
Non-adaptive	0.784145
Non-adaptive	0.833189
Non-adaptive	0.854876
Non-adaptive	0.81958
Non-adaptive	0.879516
Non-adaptive	0.795788
Non-adaptive	0.764221
Non-adaptive	0.87151
Non-adaptive	0.770937
Non-adaptive	0.814876
Non-adaptive	0.856622
Non-adaptive	0.843086
Non-adaptive	0.815105
Non-adaptive	0.814577
Non-adaptive	0.841374
Non-adaptive	0.824741
Non-adaptive	0.763187
Non-adaptive	0.785811
Non-adaptive	0.819823
Non-adaptive	0.744719
Non-adaptive	0.890419
Non-adaptive	0.824392
Non-adaptive	0.823097
Non-adaptive	0.722866
Non-adaptive	0.806883
Non-adaptive	0.875676
Non-adaptive	0.727673
Non-adaptive	0.836789
Non-adaptive	0.812559
Non-adaptive	0.751324
Non-adaptive	0.819229
Non-adaptive	0.800025
Non-adaptive	0.834519
Non-adaptive	0.797128
Non-adaptive	0.770241
Non-adaptive	0.835281
Non-adaptive	0.837252
Non-adaptive	0.746914
Non-adaptive	0.828467
Non-adaptive	0.792947
Non-adaptive	0.756505
Non-adaptive	0.841751
Non-adaptive	0.782945
Non-adaptive	0.748096
Non-adaptive	0.841472
Non-adaptive	0.804
Non-adaptive	0.828564
Non-adaptive	0.748791
Non-adaptive	0.809937
Non-adaptive	0.76909
Non-adaptive	0.819701
Non-adaptive	0.800248
Non-adaptive	0.789338
Non-adaptive	0.747104
Non-adaptive	0.85113
Non-adaptive	0.776785
Non-adaptive	0.837049
Non-adaptive	0.797713
Non-adaptive	0.781168
Non-adaptive	0.841071
Non-adaptive	0.862371
Non-adaptive	0.793974
Non-adaptive	0.813218
Non-adaptive	0.878344
Non-adaptive	0.905359
Non-adaptive	0.761063
Non-adaptive	0.654078
Non-adaptive	0.726442
Non-adaptive	0.859743
Non-adaptive	0.796173
Non-adaptive	0.760326
Non-adaptive	0.71646
Non-adaptive	0.793321
Non-adaptive	0.805952
Non-adaptive	0.818715
Non-adaptive	0.805101
Non-adaptive	0.793635
Non-adaptive	0.789579
Non-adaptive	0.864538
Non-adaptive	0.771525
Non-adaptive	0.802359
Non-adaptive	0.788828
Non-adaptive	0.707229
Non-adaptive	0.810198
Non-adaptive	0.836962
Non-adaptive	0.81549
Non-adaptive	0.877977
Non-adaptive	0.776362
Non-adaptive	0.842772
Non-adaptive	0.821796
Non-adaptive	0.731158
Non-adaptive	0.781724
Non-adaptive	0.771671
Non-adaptive	0.784204
Non-adaptive	0.75062
Non-adaptive	0.764981
Non-adaptive	0.826695
Non-adaptive	0.803051
Non-adaptive	0.872346
Non-adaptive	0.807197
Non-adaptive	0.751711
Non-adaptive	0.801008
Non-adaptive	0.817148
Non-adaptive	0.7627
Non-adaptive	0.878244
Non-adaptive	0.876459
Non-adaptive	0.765329
Non-adaptive	0.828535
Non-adaptive	0.8394
Non-adaptive	0.813938
Non-adaptive	0.821144
Non-adaptive	0.86743
Non-adaptive	0.798937
Non-adaptive	0.725972
Non-adaptive	0.806841
Non-adaptive	0.861301
Non-adaptive	0.805838
Non-adaptive	0.816844
Non-adaptive	0.886238
Non-adaptive	0.817216
Non-adaptive	0.818998
Non-adaptive	0.798638
Non-adaptive	0.775225
Non-adaptive	0.794141
Non-adaptive	0.753085
Non-adaptive	0.913379
Non-adaptive	0.804364
Non-adaptive	0.83136
Non-adaptive	0.837544
Non-adaptive	0.834991
Non-adaptive	0.750078
Non-adaptive	0.727094
Non-adaptive	0.768701
Non-adaptive	0.818836
Non-adaptive	0.804731
Non-adaptive	0.77645
Non-adaptive	0.852913
Non-adaptive	0.850293
Non-adaptive	0.813313
Non-adaptive	0.757561
Non-adaptive	0.868057
Non-adaptive	0.766872
Non-adaptive	0.857181
Non-adaptive	0.80803
Non-adaptive	0.793417
Non-adaptive	0.778987
Non-adaptive	0.773544
Non-adaptive	0.820589
Non-adaptive	0.778665
Non-adaptive	0.777546
Non-adaptive	0.763407
Non-adaptive	0.697044
Non-adaptive	0.732609
Non-adaptive	0.849273
Non-adaptive	0.772931
Non-adaptive	0.857032
Non-adaptive	0.911345
Non-adaptive	0.759512
Non-adaptive	0.773846
Non-adaptive	0.87714
Non-adaptive	0.830525
Non-adaptive	0.765046
Non-adaptive	0.785563
Non-adaptive	0.910191
Non-adaptive	0.816467
Non-adaptive	0.782263
Non-adaptive	0.740861
Non-adaptive	0.731957
Non-adaptive	0.82806
Non-adaptive	0.889422
Non-adaptive	0.825653
Non-adaptive	0.814462
Non-adaptive	0.826582
Non-adaptive	0.773558
Non-adaptive	0.797813
Non-adaptive	0.744451
Non-adaptive	0.771792
Non-adaptive	0.798442
Non-adaptive	0.898746
Non-adaptive	0.792187
Non-adaptive	0.800275
Non-adaptive	0.898033
Non-adaptive	0.869343
Non-adaptive	0.830569
Non-adaptive	0.754718
Non-adaptive	0.703465
Non-adaptive	0.843804
Non-adaptive	0.817634
Non-adaptive	0.825619
Non-adaptive	0.820935
Non-adaptive	0.799599
Non-adaptive	0.813628
Non-adaptive	0.74688
Non-adaptive	0.834646
Non-adaptive	0.779497
Non-adaptive	0.739991
Non-adaptive	0.820893
Non-adaptive	0.791246
Non-adaptive	0.846187
Non-adaptive	0.804258
Non-adaptive	0.861323
Non-adaptive	0.805092
Non-adaptive	0.831774
Non-adaptive	0.832492
Non-adaptive	0.854655
Non-adaptive	0.856826
Non-adaptive	0.805404
Non-adaptive	0.828988
Non-adaptive	0.760817
Non-adaptive	0.813154
Non-adaptive	0.723193
Non-adaptive	0.777512
Non-adaptive	0.901616
Non-adaptive	0.70629
Non-adaptive	0.754514
Non-adaptive	0.799296
Non-adaptive	0.856311
Non-adaptive	0.761835
Non-adaptive	0.731498
Non-adaptive	0.789384
Non-adaptive	0.875564
Non-adaptive	0.82455
[truncated: 8,002 more rows]

## Sheet: Figure 5C
Figure 5C. Allelic similarity between Par_N16 and SNPs with significant FST implicated as adaptive to South American highland landraces. Adaptive, from a list of 390 adaptive SNPs; Non-adaptive, from random lists of 20 non-adaptive SNPs.
Group	Proportion
Adaptive	0.491892
Non-adaptive	0.884216
Non-adaptive	0.812606
Non-adaptive	0.758186
Non-adaptive	0.637872
Non-adaptive	0.875575
Non-adaptive	0.918078
Non-adaptive	0.901536
Non-adaptive	0.859935
Non-adaptive	0.79385
Non-adaptive	0.919641
Non-adaptive	0.790965
Non-adaptive	0.752076
Non-adaptive	0.847886
Non-adaptive	0.78338
Non-adaptive	0.810936
Non-adaptive	0.906629
Non-adaptive	0.796486
Non-adaptive	0.752153
Non-adaptive	0.876224
Non-adaptive	0.8064
Non-adaptive	0.885449
Non-adaptive	0.836103
Non-adaptive	0.807562
Non-adaptive	0.899047
Non-adaptive	0.821995
Non-adaptive	0.82471
Non-adaptive	0.896964
Non-adaptive	0.905887
Non-adaptive	0.81601
Non-adaptive	0.838034
Non-adaptive	0.887742
Non-adaptive	0.849841
Non-adaptive	0.748285
Non-adaptive	0.795632
Non-adaptive	0.817229
Non-adaptive	0.854104
Non-adaptive	0.857679
Non-adaptive	0.825674
Non-adaptive	0.841998
Non-adaptive	0.814468
Non-adaptive	0.79566
Non-adaptive	0.803055
Non-adaptive	0.820767
Non-adaptive	0.798807
Non-adaptive	0.831114
Non-adaptive	0.935505
Non-adaptive	0.901124
Non-adaptive	0.820304
Non-adaptive	0.864416
Non-adaptive	0.88515
Non-adaptive	0.883141
Non-adaptive	0.765681
Non-adaptive	0.798463
Non-adaptive	0.832194
Non-adaptive	0.781332
Non-adaptive	0.821186
Non-adaptive	0.796225
Non-adaptive	0.838019
Non-adaptive	0.896229
Non-adaptive	0.718489
Non-adaptive	0.685978
Non-adaptive	0.662355
Non-adaptive	0.838437
Non-adaptive	0.855738
Non-adaptive	0.817206
Non-adaptive	0.812847
Non-adaptive	0.78629
Non-adaptive	0.735558
Non-adaptive	0.804717
Non-adaptive	0.911596
Non-adaptive	0.852357
Non-adaptive	0.90896
Non-adaptive	0.818972
Non-adaptive	0.816837
Non-adaptive	0.783106
Non-adaptive	0.895533
Non-adaptive	0.865122
Non-adaptive	0.782876
Non-adaptive	0.893154
Non-adaptive	0.76804
Non-adaptive	0.78638
Non-adaptive	0.897103
Non-adaptive	0.808462
Non-adaptive	0.843918
Non-adaptive	0.773741
Non-adaptive	0.815831
Non-adaptive	0.795602
Non-adaptive	0.872806
Non-adaptive	0.844219
Non-adaptive	0.818295
Non-adaptive	0.849723
Non-adaptive	0.785192
Non-adaptive	0.802893
Non-adaptive	0.765738
Non-adaptive	0.692119
Non-adaptive	0.812992
Non-adaptive	0.909733
Non-adaptive	0.812631
Non-adaptive	0.72413
Non-adaptive	0.8888
Non-adaptive	0.807575
Non-adaptive	0.822541
Non-adaptive	0.77315
Non-adaptive	0.782544
Non-adaptive	0.892516
Non-adaptive	0.888845
Non-adaptive	0.823995
Non-adaptive	0.768635
Non-adaptive	0.864497
Non-adaptive	0.82439
Non-adaptive	0.898485
Non-adaptive	0.868926
Non-adaptive	0.850225
Non-adaptive	0.70471
Non-adaptive	0.796284
Non-adaptive	0.872947
Non-adaptive	0.874124
Non-adaptive	0.820081
Non-adaptive	0.896182
Non-adaptive	0.814357
Non-adaptive	0.838226
Non-adaptive	0.805439
Non-adaptive	0.813065
Non-adaptive	0.818797
Non-adaptive	0.799566
Non-adaptive	0.84299
Non-adaptive	0.782738
Non-adaptive	0.816022
Non-adaptive	0.760037
Non-adaptive	0.914808
Non-adaptive	0.796996
Non-adaptive	0.803049
Non-adaptive	0.865187
Non-adaptive	0.850652
Non-adaptive	0.75625
Non-adaptive	0.832036
Non-adaptive	0.888793
Non-adaptive	0.870165
Non-adaptive	0.915263
Non-adaptive	0.817804
Non-adaptive	0.773705
Non-adaptive	0.86861
Non-adaptive	0.813629
Non-adaptive	0.783385
Non-adaptive	0.790555
Non-adaptive	0.828552
Non-adaptive	0.891513
Non-adaptive	0.891625
Non-adaptive	0.825224
Non-adaptive	0.882059
Non-adaptive	0.876657
Non-adaptive	0.872825
Non-adaptive	0.891413
Non-adaptive	0.901493
Non-adaptive	0.855489
Non-adaptive	0.810274
Non-adaptive	0.773352
Non-adaptive	0.898264
Non-adaptive	0.860833
Non-adaptive	0.789883
Non-adaptive	0.750587
Non-adaptive	0.797179
Non-adaptive	0.797041
Non-adaptive	0.870734
Non-adaptive	0.855407
Non-adaptive	0.877203
Non-adaptive	0.839137
Non-adaptive	0.787037
Non-adaptive	0.927836
Non-adaptive	0.793426
Non-adaptive	0.810295
Non-adaptive	0.931051
Non-adaptive	0.837469
Non-adaptive	0.834836
Non-adaptive	0.723509
Non-adaptive	0.77655
Non-adaptive	0.898438
Non-adaptive	0.783779
Non-adaptive	0.814388
Non-adaptive	0.890387
Non-adaptive	0.83939
Non-adaptive	0.86643
Non-adaptive	0.841885
Non-adaptive	0.772184
Non-adaptive	0.755665
Non-adaptive	0.856198
Non-adaptive	0.841568
Non-adaptive	0.891202
Non-adaptive	0.801066
Non-adaptive	0.84466
Non-adaptive	0.773671
Non-adaptive	0.814193
Non-adaptive	0.802639
Non-adaptive	0.747165
Non-adaptive	0.888826
Non-adaptive	0.7033
Non-adaptive	0.770173
Non-adaptive	0.723947
Non-adaptive	0.763794
Non-adaptive	0.821032
Non-adaptive	0.802839
Non-adaptive	0.854026
Non-adaptive	0.795267
Non-adaptive	0.820503
Non-adaptive	0.75117
Non-adaptive	0.793278
Non-adaptive	0.833294
Non-adaptive	0.945613
Non-adaptive	0.8588
Non-adaptive	0.824714
Non-adaptive	0.880948
Non-adaptive	0.786085
Non-adaptive	0.834628
Non-adaptive	0.852427
Non-adaptive	0.858835
Non-adaptive	0.753028
Non-adaptive	0.662001
Non-adaptive	0.860085
Non-adaptive	0.783963
Non-adaptive	0.775225
Non-adaptive	0.818898
Non-adaptive	0.855004
Non-adaptive	0.670121
Non-adaptive	0.820823
Non-adaptive	0.845439
Non-adaptive	0.853437
Non-adaptive	0.907745
Non-adaptive	0.853151
Non-adaptive	0.78369
Non-adaptive	0.779879
Non-adaptive	0.728666
Non-adaptive	0.868846
Non-adaptive	0.892732
Non-adaptive	0.64304
Non-adaptive	0.949415
Non-adaptive	0.829845
Non-adaptive	0.848031
Non-adaptive	0.898109
Non-adaptive	0.720092
Non-adaptive	0.789457
Non-adaptive	0.865123
Non-adaptive	0.915609
Non-adaptive	0.728146
Non-adaptive	0.762084
Non-adaptive	0.799246
Non-adaptive	0.845868
Non-adaptive	0.747222
Non-adaptive	0.885055
Non-adaptive	0.895538
Non-adaptive	0.935479
Non-adaptive	0.883687
Non-adaptive	0.8125
Non-adaptive	0.808336
Non-adaptive	0.935838
Non-adaptive	0.724452
Non-adaptive	0.766546
Non-adaptive	0.835621
Non-adaptive	0.795175
Non-adaptive	0.797246
Non-adaptive	0.945856
Non-adaptive	0.807404
Non-adaptive	0.896109
Non-adaptive	0.80745
Non-adaptive	0.831898
Non-adaptive	0.843247
Non-adaptive	0.733277
Non-adaptive	0.875673
Non-adaptive	0.910308
Non-adaptive	0.980198
Non-adaptive	0.830696
Non-adaptive	0.864721
Non-adaptive	0.931253
Non-adaptive	0.836818
Non-adaptive	0.9022
Non-adaptive	0.821421
Non-adaptive	0.813721
Non-adaptive	0.801287
Non-adaptive	0.923342
Non-adaptive	0.749029
Non-adaptive	0.888327
Non-adaptive	0.78391
Non-adaptive	0.823657
Non-adaptive	0.755623
Non-adaptive	0.876303
Non-adaptive	0.857169
Non-adaptive	0.864769
Non-adaptive	0.861255
Non-adaptive	0.803958
Non-adaptive	0.911296
Non-adaptive	0.77108
Non-adaptive	0.894194
Non-adaptive	0.837006
Non-adaptive	0.882869
Non-adaptive	0.888347
Non-adaptive	0.846795
Non-adaptive	0.832055
Non-adaptive	0.877553
Non-adaptive	0.852766
Non-adaptive	0.841828
Non-adaptive	0.895009
Non-adaptive	0.854622
Non-adaptive	0.922881
Non-adaptive	0.867079
Non-adaptive	0.901926
Non-adaptive	0.775252
Non-adaptive	0.828605
Non-adaptive	0.763911
Non-adaptive	0.849959
Non-adaptive	0.755867
Non-adaptive	0.848881
Non-adaptive	0.885103
Non-adaptive	0.753089
Non-adaptive	0.792945
Non-adaptive	0.822789
Non-adaptive	0.918797
Non-adaptive	0.757099
Non-adaptive	0.788499
Non-adaptive	0.799086
Non-adaptive	0.790543
Non-adaptive	0.841058
Non-adaptive	0.813073
Non-adaptive	0.871205
Non-adaptive	0.801787
Non-adaptive	0.870015
Non-adaptive	0.774977
Non-adaptive	0.780433
Non-adaptive	0.943783
Non-adaptive	0.872954
Non-adaptive	0.939421
Non-adaptive	0.878803
Non-adaptive	0.746429
Non-adaptive	0.714401
Non-adaptive	0.798925
Non-adaptive	0.821893
Non-adaptive	0.899012
Non-adaptive	0.860697
Non-adaptive	0.878072
Non-adaptive	0.890257
Non-adaptive	0.821091
Non-adaptive	0.753514
Non-adaptive	0.795732
Non-adaptive	0.748043
Non-adaptive	0.925559
Non-adaptive	0.917022
Non-adaptive	0.832826
Non-adaptive	0.933337
Non-adaptive	0.714342
Non-adaptive	0.836318
Non-adaptive	0.784256
Non-adaptive	0.812951
Non-adaptive	0.847403
Non-adaptive	0.736427
Non-adaptive	0.773741
Non-adaptive	0.858868
Non-adaptive	0.787032
Non-adaptive	0.911096
Non-adaptive	0.848558
Non-adaptive	0.887188
Non-adaptive	0.896144
Non-adaptive	0.846754
Non-adaptive	0.713832
Non-adaptive	0.842678
Non-adaptive	0.804379
Non-adaptive	0.908862
Non-adaptive	0.83798
Non-adaptive	0.921119
Non-adaptive	0.810636
Non-adaptive	0.82906
Non-adaptive	0.859823
Non-adaptive	0.853582
Non-adaptive	0.89404
Non-adaptive	0.834641
Non-adaptive	0.850591
Non-adaptive	0.88276
Non-adaptive	0.831825
Non-adaptive	0.836469
Non-adaptive	0.832729
Non-adaptive	0.907093
Non-adaptive	0.900181
Non-adaptive	0.890993
Non-adaptive	0.878897
Non-adaptive	0.809899
Non-adaptive	0.830863
Non-adaptive	0.840471
Non-adaptive	0.761989
Non-adaptive	0.864946
Non-adaptive	0.852326
Non-adaptive	0.849546
Non-adaptive	0.942932
Non-adaptive	0.816211
Non-adaptive	0.867816
Non-adaptive	0.807017
Non-adaptive	0.818288
Non-adaptive	0.867943
Non-adaptive	0.802388
Non-adaptive	0.874571
Non-adaptive	0.802256
Non-adaptive	0.861586
Non-adaptive	0.892865
Non-adaptive	0.797237
Non-adaptive	0.856727
Non-adaptive	0.886335
Non-adaptive	0.800455
Non-adaptive	0.850069
Non-adaptive	0.745347
Non-adaptive	0.917219
Non-adaptive	0.933568
Non-adaptive	0.920522
Non-adaptive	0.935943
Non-adaptive	0.836434
Non-adaptive	0.961397
Non-adaptive	0.894429
Non-adaptive	0.811122
Non-adaptive	0.784033
Non-adaptive	0.825089
Non-adaptive	0.809315
Non-adaptive	0.884306
Non-adaptive	0.862664
Non-adaptive	0.824346
Non-adaptive	0.747404
Non-adaptive	0.920423
Non-adaptive	0.875673
Non-adaptive	0.887903
Non-adaptive	0.85496
Non-adaptive	0.790393
Non-adaptive	0.824071
Non-adaptive	0.813308
Non-adaptive	0.748604
Non-adaptive	0.903318
Non-adaptive	0.758262
Non-adaptive	0.843884
Non-adaptive	0.852329
Non-adaptive	0.867363
Non-adaptive	0.897388
Non-adaptive	0.840731
Non-adaptive	0.809097
Non-adaptive	0.839886
Non-adaptive	0.819298
Non-adaptive	0.875332
Non-adaptive	0.870888
Non-adaptive	0.753198
Non-adaptive	0.716399
Non-adaptive	0.902176
Non-adaptive	0.895178
Non-adaptive	0.855328
Non-adaptive	0.776643
Non-adaptive	0.865685
Non-adaptive	0.868185
Non-adaptive	0.893571
Non-adaptive	0.832317
Non-adaptive	0.903342
Non-adaptive	0.800763
Non-adaptive	0.837777
Non-adaptive	0.833949
Non-adaptive	0.814841
Non-adaptive	0.828457
Non-adaptive	0.810088
Non-adaptive	0.813196
Non-adaptive	0.81747
Non-adaptive	0.799082
Non-adaptive	0.902038
Non-adaptive	0.790634
Non-adaptive	0.869105
Non-adaptive	0.79532
Non-adaptive	0.800326
Non-adaptive	0.875784
Non-adaptive	0.865675
Non-adaptive	0.921784
Non-adaptive	0.860458
Non-adaptive	0.758615
Non-adaptive	0.856349
Non-adaptive	0.899972
Non-adaptive	0.875006
Non-adaptive	0.871107
Non-adaptive	0.788988
Non-adaptive	0.809432
Non-adaptive	0.801371
Non-adaptive	0.844646
Non-adaptive	0.855377
Non-adaptive	0.808857
Non-adaptive	0.864472
Non-adaptive	0.810346
Non-adaptive	0.780982
Non-adaptive	0.859764
Non-adaptive	0.834752
Non-adaptive	0.706298
Non-adaptive	0.774663
Non-adaptive	0.919647
Non-adaptive	0.735957
Non-adaptive	0.862812
Non-adaptive	0.758682
Non-adaptive	0.790117
Non-adaptive	0.842072
Non-adaptive	0.928329
Non-adaptive	0.941358
Non-adaptive	0.837886
Non-adaptive	0.786971
Non-adaptive	0.76637
Non-adaptive	0.825795
Non-adaptive	0.901189
Non-adaptive	0.929813
Non-adaptive	0.840358
Non-adaptive	0.812837
Non-adaptive	0.815906
Non-adaptive	0.907976
Non-adaptive	0.900694
Non-adaptive	0.906195
Non-adaptive	0.836555
Non-adaptive	0.805498
Non-adaptive	0.820774
Non-adaptive	0.817594
Non-adaptive	0.788555
Non-adaptive	0.823765
Non-adaptive	0.856273
Non-adaptive	0.936052
Non-adaptive	0.881458
Non-adaptive	0.728951
Non-adaptive	0.824442
Non-adaptive	0.674751
Non-adaptive	0.903847
Non-adaptive	0.854751
Non-adaptive	0.92807
Non-adaptive	0.833288
Non-adaptive	0.84947
Non-adaptive	0.873885
Non-adaptive	0.866267
Non-adaptive	0.852421
Non-adaptive	0.867026
Non-adaptive	0.804805
Non-adaptive	0.789278
Non-adaptive	0.793962
Non-adaptive	0.815477
Non-adaptive	0.854464
Non-adaptive	0.870883
Non-adaptive	0.923938
Non-adaptive	0.775784
Non-adaptive	0.83047
Non-adaptive	0.829131
Non-adaptive	0.721179
Non-adaptive	0.808475
Non-adaptive	0.77638
Non-adaptive	0.850716
Non-adaptive	0.923956
Non-adaptive	0.892856
Non-adaptive	0.76159
Non-adaptive	0.676219
Non-adaptive	0.759871
Non-adaptive	0.844145
Non-adaptive	0.838542
Non-adaptive	0.795254
Non-adaptive	0.79275
Non-adaptive	0.834772
Non-adaptive	0.918486
Non-adaptive	0.841224
Non-adaptive	0.738018
Non-adaptive	0.796857
Non-adaptive	0.830878
Non-adaptive	0.739782
Non-adaptive	0.808211
Non-adaptive	0.857171
Non-adaptive	0.819213
Non-adaptive	0.871396
Non-adaptive	0.939047
Non-adaptive	0.675212
Non-adaptive	0.780148
Non-adaptive	0.865051
Non-adaptive	0.843191
Non-adaptive	0.833619
Non-adaptive	0.807256
Non-adaptive	0.784321
Non-adaptive	0.915266
Non-adaptive	0.817301
Non-adaptive	0.808921
Non-adaptive	0.681172
Non-adaptive	0.9003
Non-adaptive	0.841682
Non-adaptive	0.88826
Non-adaptive	0.820029
Non-adaptive	0.847498
Non-adaptive	0.902232
Non-adaptive	0.80478
Non-adaptive	0.861079
Non-adaptive	0.840992
Non-adaptive	0.814916
Non-adaptive	0.797996
Non-adaptive	0.860319
Non-adaptive	0.773208
Non-adaptive	0.775887
Non-adaptive	0.788283
Non-adaptive	0.83009
Non-adaptive	0.855246
Non-adaptive	0.779917
Non-adaptive	0.874497
Non-adaptive	0.772802
Non-adaptive	0.859375
Non-adaptive	0.809087
Non-adaptive	0.809631
Non-adaptive	0.857275
Non-adaptive	0.855232
Non-adaptive	0.75085
Non-adaptive	0.829051
Non-adaptive	0.834377
Non-adaptive	0.796123
Non-adaptive	0.839278
Non-adaptive	0.793838
Non-adaptive	0.840494
Non-adaptive	0.795437
Non-adaptive	0.95915
Non-adaptive	0.758827
Non-adaptive	0.883088
Non-adaptive	0.915404
Non-adaptive	0.84424
Non-adaptive	0.863762
Non-adaptive	0.796261
Non-adaptive	0.799793
Non-adaptive	0.849937
Non-adaptive	0.717701
Non-adaptive	0.866964
Non-adaptive	0.894398
Non-adaptive	0.813887
Non-adaptive	0.797475
Non-adaptive	0.797295
Non-adaptive	0.844132
Non-adaptive	0.834266
Non-adaptive	0.857672
Non-adaptive	0.824195
Non-adaptive	0.878642
Non-adaptive	0.833065
Non-adaptive	0.87052
Non-adaptive	0.908608
Non-adaptive	0.896667
Non-adaptive	0.865776
Non-adaptive	0.862223
Non-adaptive	0.893162
Non-adaptive	0.777144
Non-adaptive	0.7458
Non-adaptive	0.893924
Non-adaptive	0.886654
Non-adaptive	0.848446
Non-adaptive	0.817328
Non-adaptive	0.857424
Non-adaptive	0.775235
Non-adaptive	0.836134
Non-adaptive	0.869691
Non-adaptive	0.824306
Non-adaptive	0.82587
Non-adaptive	0.87618
Non-adaptive	0.810566
Non-adaptive	0.80658
Non-adaptive	0.867622
Non-adaptive	0.788282
Non-adaptive	0.785822
Non-adaptive	0.827241
Non-adaptive	0.823049
Non-adaptive	0.804305
Non-adaptive	0.85382
Non-adaptive	0.819899
Non-adaptive	0.785323
Non-adaptive	0.921148
Non-adaptive	0.785444
Non-adaptive	0.859207
Non-adaptive	0.842147
Non-adaptive	0.916819
Non-adaptive	0.894005
Non-adaptive	0.823831
Non-adaptive	0.784139
Non-adaptive	0.766383
Non-adaptive	0.872822
Non-adaptive	0.905505
Non-adaptive	0.864683
Non-adaptive	0.776953
Non-adaptive	0.850148
Non-adaptive	0.93404
Non-adaptive	0.871349
Non-adaptive	0.850227
Non-adaptive	0.768722
Non-adaptive	0.814916
Non-adaptive	0.755335
Non-adaptive	0.877284
Non-adaptive	0.867506
Non-adaptive	0.803353
Non-adaptive	0.840224
Non-adaptive	0.82231
Non-adaptive	0.947034
Non-adaptive	0.82735
Non-adaptive	0.822787
Non-adaptive	0.843673
Non-adaptive	0.856795
Non-adaptive	0.859237
Non-adaptive	0.732314
Non-adaptive	0.814971
Non-adaptive	0.754364
Non-adaptive	0.844809
Non-adaptive	0.88278
Non-adaptive	0.872917
Non-adaptive	0.801976
Non-adaptive	0.868178
Non-adaptive	0.819426
Non-adaptive	0.736349
Non-adaptive	0.722263
Non-adaptive	0.924191
Non-adaptive	0.711985
Non-adaptive	0.726299
Non-adaptive	0.747444
Non-adaptive	0.788383
Non-adaptive	0.87911
Non-adaptive	0.845766
Non-adaptive	0.891614
Non-adaptive	0.837548
Non-adaptive	0.910255
Non-adaptive	0.759928
Non-adaptive	0.71942
Non-adaptive	0.816299
Non-adaptive	0.908599
Non-adaptive	0.923992
Non-adaptive	0.718099
Non-adaptive	0.708361
Non-adaptive	0.886565
Non-adaptive	0.813496
Non-adaptive	0.768085
Non-adaptive	0.78681
Non-adaptive	0.845759
Non-adaptive	0.870668
Non-adaptive	0.875044
Non-adaptive	0.778479
Non-adaptive	0.884985
Non-adaptive	0.859428
Non-adaptive	0.921818
Non-adaptive	0.926435
Non-adaptive	0.820915
Non-adaptive	0.776727
Non-adaptive	0.893172
Non-adaptive	0.784921
Non-adaptive	0.852799
Non-adaptive	0.917027
Non-adaptive	0.877177
Non-adaptive	0.941023
Non-adaptive	0.800286
Non-adaptive	0.806438
Non-adaptive	0.893522
Non-adaptive	0.893498
Non-adaptive	0.830249
Non-adaptive	0.884973
Non-adaptive	0.812127
Non-adaptive	0.805603
Non-adaptive	0.862538
Non-adaptive	0.842985
Non-adaptive	0.89689
Non-adaptive	0.93741
Non-adaptive	0.782662
Non-adaptive	0.751584
Non-adaptive	0.77695
Non-adaptive	0.874958
Non-adaptive	0.782024
Non-adaptive	0.820331
Non-adaptive	0.732484
Non-adaptive	0.720186
Non-adaptive	0.798899
Non-adaptive	0.852183
Non-adaptive	0.812838
Non-adaptive	0.843782
Non-adaptive	0.713151
Non-adaptive	0.651285
Non-adaptive	0.803787
Non-adaptive	0.835713
Non-adaptive	0.644731
Non-adaptive	0.903631
Non-adaptive	0.828947
Non-adaptive	0.778771
Non-adaptive	0.89316
Non-adaptive	0.890885
Non-adaptive	0.721461
Non-adaptive	0.778553
Non-adaptive	0.807893
Non-adaptive	0.845833
Non-adaptive	0.883415
Non-adaptive	0.869935
Non-adaptive	0.875154
Non-adaptive	0.838564
Non-adaptive	0.860764
Non-adaptive	0.822622
Non-adaptive	0.912841
Non-adaptive	0.962032
Non-adaptive	0.730305
Non-adaptive	0.776943
Non-adaptive	0.778772
Non-adaptive	0.938235
Non-adaptive	0.843156
Non-adaptive	0.931433
Non-adaptive	0.698666
Non-adaptive	0.771471
Non-adaptive	0.779683
Non-adaptive	0.747974
Non-adaptive	0.804823
Non-adaptive	0.867552
Non-adaptive	0.904909
Non-adaptive	0.825923
Non-adaptive	0.806236
Non-adaptive	0.843627
Non-adaptive	0.834115
Non-adaptive	0.780765
Non-adaptive	0.870968
Non-adaptive	0.855465
Non-adaptive	0.747152
Non-adaptive	0.849185
Non-adaptive	0.800285
Non-adaptive	0.688567
Non-adaptive	0.861477
Non-adaptive	0.863719
Non-adaptive	0.742958
Non-adaptive	0.857045
Non-adaptive	0.869761
Non-adaptive	0.849535
Non-adaptive	0.794877
Non-adaptive	0.888389
Non-adaptive	0.832763
Non-adaptive	0.801962
Non-adaptive	0.906052
Non-adaptive	0.894885
Non-adaptive	0.788994
Non-adaptive	0.807202
Non-adaptive	0.624329
Non-adaptive	0.878281
Non-adaptive	0.882696
Non-adaptive	0.85566
Non-adaptive	0.917493
Non-adaptive	0.878186
Non-adaptive	0.840498
Non-adaptive	0.84424
Non-adaptive	0.881047
Non-adaptive	0.825216
Non-adaptive	0.843419
Non-adaptive	0.749783
Non-adaptive	0.885736
Non-adaptive	0.85948
Non-adaptive	0.898508
Non-adaptive	0.754309
Non-adaptive	0.937346
Non-adaptive	0.79697
Non-adaptive	0.741523
Non-adaptive	0.898308
Non-adaptive	0.906853
Non-adaptive	0.836448
Non-adaptive	0.896195
Non-adaptive	0.807476
Non-adaptive	0.872784
Non-adaptive	0.749324
Non-adaptive	0.826732
Non-adaptive	0.913673
Non-adaptive	0.616606
Non-adaptive	0.786785
Non-adaptive	0.910655
Non-adaptive	0.909363
Non-adaptive	0.880879
Non-adaptive	0.878385
Non-adaptive	0.877903
Non-adaptive	0.781933
Non-adaptive	0.720493
Non-adaptive	0.872277
Non-adaptive	0.846667
Non-adaptive	0.761582
Non-adaptive	0.78498
Non-adaptive	0.836706
Non-adaptive	0.857458
Non-adaptive	0.855776
Non-adaptive	0.785238
Non-adaptive	0.833712
Non-adaptive	0.782251
Non-adaptive	0.836243
Non-adaptive	0.896184
Non-adaptive	0.686433
Non-adaptive	0.854123
Non-adaptive	0.837077
Non-adaptive	0.80446
Non-adaptive	0.838867
Non-adaptive	0.901269
Non-adaptive	0.725255
Non-adaptive	0.720191
Non-adaptive	0.908084
Non-adaptive	0.74825
Non-adaptive	0.864312
Non-adaptive	0.805623
Non-adaptive	0.781471
Non-adaptive	0.800131
Non-adaptive	0.755047
Non-adaptive	0.844413
Non-adaptive	0.839959
Non-adaptive	0.805208
Non-adaptive	0.840318
Non-adaptive	0.816687
Non-adaptive	0.834998
Non-adaptive	0.803971
Non-adaptive	0.821393
Non-adaptive	0.77625
Non-adaptive	0.901337
Non-adaptive	0.772732
Non-adaptive	0.797838
Non-adaptive	0.756262
Non-adaptive	0.876381
Non-adaptive	0.898825
Non-adaptive	0.838974
Non-adaptive	0.78836
Non-adaptive	0.806793
Non-adaptive	0.808612
Non-adaptive	0.763826
Non-adaptive	0.805336
Non-adaptive	0.783621
Non-adaptive	0.761158
Non-adaptive	0.83765
Non-adaptive	0.837796
Non-adaptive	0.762668
Non-adaptive	0.8514
Non-adaptive	0.845684
Non-adaptive	0.832125
Non-adaptive	0.842528
Non-adaptive	0.881134
Non-adaptive	0.731337
Non-adaptive	0.758595
Non-adaptive	0.800047
Non-adaptive	0.817352
Non-adaptive	0.760474
Non-adaptive	0.90458
Non-adaptive	0.919122
Non-adaptive	0.793138
Non-adaptive	0.802715
Non-adaptive	0.882125
Non-adaptive	0.784409
Non-adaptive	0.807521
Non-adaptive	0.873501
Non-adaptive	0.914835
Non-adaptive	0.840968
Non-adaptive	0.738601
Non-adaptive	0.857343
Non-adaptive	0.87915
Non-adaptive	0.850159
Non-adaptive	0.867696
Non-adaptive	0.725663
Non-adaptive	0.782463
Non-adaptive	0.824486
Non-adaptive	0.861862
Non-adaptive	0.842967
Non-adaptive	0.905782
Non-adaptive	0.829794
Non-adaptive	0.899008
Non-adaptive	0.655866
Non-adaptive	0.810591
Non-adaptive	0.949937
Non-adaptive	0.826058
Non-adaptive	0.864728
Non-adaptive	0.850421
Non-adaptive	0.895124
Non-adaptive	0.842704
Non-adaptive	0.823429
Non-adaptive	0.772858
Non-adaptive	0.907124
Non-adaptive	0.903824
Non-adaptive	0.76362
Non-adaptive	0.857964
Non-adaptive	0.802358
Non-adaptive	0.85089
Non-adaptive	0.723611
Non-adaptive	0.898517
Non-adaptive	0.826835
Non-adaptive	0.788822
Non-adaptive	0.781565
Non-adaptive	0.872745
Non-adaptive	0.901116
Non-adaptive	0.787704
Non-adaptive	0.867193
Non-adaptive	0.828846
Non-adaptive	0.801618
Non-adaptive	0.849529
Non-adaptive	0.825899
Non-adaptive	0.859067
Non-adaptive	0.877194
Non-adaptive	0.818204
Non-adaptive	0.924926
Non-adaptive	0.81543
Non-adaptive	0.767832
Non-adaptive	0.824652
Non-adaptive	0.882196
Non-adaptive	0.820374
Non-adaptive	0.811596
Non-adaptive	0.860872
Non-adaptive	0.9073
Non-adaptive	0.841347
Non-adaptive	0.877273
Non-adaptive	0.749346
Non-adaptive	0.942207
Non-adaptive	0.780366
Non-adaptive	0.776391
Non-adaptive	0.746627
Non-adaptive	0.840121
Non-adaptive	0.796338
Non-adaptive	0.805528
Non-adaptive	0.80585
Non-adaptive	0.798677
Non-adaptive	0.81245
Non-adaptive	0.790947
Non-adaptive	0.865359
Non-adaptive	0.76844
Non-adaptive	0.735018
Non-adaptive	0.831173
Non-adaptive	0.892434
Non-adaptive	0.835032
Non-adaptive	0.878545
Non-adaptive	0.845953
Non-adaptive	0.786939
Non-adaptive	0.925411
Non-adaptive	0.855638
Non-adaptive	0.838128
Non-adaptive	0.902005
Non-adaptive	0.936319
Non-adaptive	0.844815
Non-adaptive	0.818717
Non-adaptive	0.934986
Non-adaptive	0.867713
Non-adaptive	0.852713
Non-adaptive	0.839632
Non-adaptive	0.86855
Non-adaptive	0.798038
Non-adaptive	0.849145
Non-adaptive	0.915057
Non-adaptive	0.844526
Non-adaptive	0.78852
Non-adaptive	0.737592
Non-adaptive	0.808438
Non-adaptive	0.886795
Non-adaptive	0.922842
Non-adaptive	0.89868
Non-adaptive	0.873163
Non-adaptive	0.763074
Non-adaptive	0.81015
Non-adaptive	0.878548
Non-adaptive	0.75593
Non-adaptive	0.923592
Non-adaptive	0.815406
Non-adaptive	0.819789
Non-adaptive	0.774101
Non-adaptive	0.886388
Non-adaptive	0.870706
Non-adaptive	0.868706
Non-adaptive	0.944387
Non-adaptive	0.861984
Non-adaptive	0.821861
Non-adaptive	0.859519
Non-adaptive	0.742324
Non-adaptive	0.852361
Non-adaptive	0.825674
Non-adaptive	0.789136
Non-adaptive	0.797928
Non-adaptive	0.869118
Non-adaptive	0.807813
Non-adaptive	0.926267
Non-adaptive	0.910167
Non-adaptive	0.776424
Non-adaptive	0.801643
Non-adaptive	0.820905
Non-adaptive	0.741617
Non-adaptive	0.905886
Non-adaptive	0.676998
Non-adaptive	0.843613
Non-adaptive	0.731046
Non-adaptive	0.813901
Non-adaptive	0.853633
Non-adaptive	0.850316
Non-adaptive	0.857989
Non-adaptive	0.820434
Non-adaptive	0.874431
Non-adaptive	0.9335
Non-adaptive	0.807668
Non-adaptive	0.833957
Non-adaptive	0.827193
Non-adaptive	0.83065
Non-adaptive	0.927451
Non-adaptive	0.806969
Non-adaptive	0.912795
Non-adaptive	0.82004
Non-adaptive	0.875917
Non-adaptive	0.896482
Non-adaptive	0.822895
Non-adaptive	0.830393
Non-adaptive	0.836587
Non-adaptive	0.945266
Non-adaptive	0.762531
Non-adaptive	0.818304
Non-adaptive	0.806182
Non-adaptive	0.818984
Non-adaptive	0.732543
Non-adaptive	0.826471
Non-adaptive	0.840547
Non-adaptive	0.769456
Non-adaptive	0.791007
Non-adaptive	0.735668
Non-adaptive	0.905422
Non-adaptive	0.809201
Non-adaptive	0.76403
Non-adaptive	0.875462
Non-adaptive	0.78738
Non-adaptive	0.900473
Non-adaptive	0.810954
Non-adaptive	0.881256
Non-adaptive	0.787434
Non-adaptive	0.846217
Non-adaptive	0.676872
Non-adaptive	0.773545
Non-adaptive	0.782916
Non-adaptive	0.848389
Non-adaptive	0.877208
Non-adaptive	0.884906
Non-adaptive	0.686931
Non-adaptive	0.880743
Non-adaptive	0.80946
Non-adaptive	0.86249
Non-adaptive	0.751728
Non-adaptive	0.692826
Non-adaptive	0.796317
Non-adaptive	0.854957
Non-adaptive	0.862989
Non-adaptive	0.74538
Non-adaptive	0.718063
Non-adaptive	0.879754
Non-adaptive	0.744745
Non-adaptive	0.870873
Non-adaptive	0.818147
Non-adaptive	0.83272
Non-adaptive	0.806051
Non-adaptive	0.810578
Non-adaptive	0.856727
Non-adaptive	0.698083
Non-adaptive	0.799086
Non-adaptive	0.775438
Non-adaptive	0.882549
Non-adaptive	0.846502
Non-adaptive	0.888878
Non-adaptive	0.844777
Non-adaptive	0.858442
Non-adaptive	0.855617
Non-adaptive	0.89657
Non-adaptive	0.838221
Non-adaptive	0.717728
Non-adaptive	0.747736
Non-adaptive	0.81877
Non-adaptive	0.858115
Non-adaptive	0.959742
Non-adaptive	0.871439
Non-adaptive	0.873337
Non-adaptive	0.868404
Non-adaptive	0.792782
Non-adaptive	0.87952
Non-adaptive	0.82851
Non-adaptive	0.853369
Non-adaptive	0.893559
Non-adaptive	0.785014
Non-adaptive	0.636232
Non-adaptive	0.874717
Non-adaptive	0.825599
Non-adaptive	0.891629
Non-adaptive	0.904265
Non-adaptive	0.789782
Non-adaptive	0.819127
Non-adaptive	0.793887
Non-adaptive	0.835908
Non-adaptive	0.868838
Non-adaptive	0.849318
Non-adaptive	0.815364
Non-adaptive	0.851838
Non-adaptive	0.830704
Non-adaptive	0.847108
Non-adaptive	0.904976
Non-adaptive	0.864585
Non-adaptive	0.876031
Non-adaptive	0.918696
Non-adaptive	0.747778
Non-adaptive	0.875957
Non-adaptive	0.762361
Non-adaptive	0.834008
Non-adaptive	0.852735
Non-adaptive	0.832804
Non-adaptive	0.903113
Non-adaptive	0.752985
Non-adaptive	0.768588
Non-adaptive	0.799296
Non-adaptive	0.794908
Non-adaptive	0.941494
Non-adaptive	0.823962
Non-adaptive	0.888607
Non-adaptive	0.841137
Non-adaptive	0.850146
Non-adaptive	0.895385
Non-adaptive	0.849788
Non-adaptive	0.870817
Non-adaptive	0.85288
Non-adaptive	0.820423
Non-adaptive	0.794219
Non-adaptive	0.789744
Non-adaptive	0.89638
Non-adaptive	0.728094
Non-adaptive	0.848554
Non-adaptive	0.782657
Non-adaptive	0.773426
Non-adaptive	0.858538
Non-adaptive	0.868036
Non-adaptive	0.867174
Non-adaptive	0.802756
Non-adaptive	0.874671
Non-adaptive	0.85761
Non-adaptive	0.837322
Non-adaptive	0.792637
Non-adaptive	0.807961
Non-adaptive	0.902283
Non-adaptive	0.781457
Non-adaptive	0.825989
Non-adaptive	0.827401
Non-adaptive	0.837996
Non-adaptive	0.763966
Non-adaptive	0.790418
Non-adaptive	0.921696
Non-adaptive	0.761313
Non-adaptive	0.746343
Non-adaptive	0.873073
Non-adaptive	0.887545
Non-adaptive	0.709027
Non-adaptive	0.77897
Non-adaptive	0.754812
Non-adaptive	0.782633
Non-adaptive	0.889662
Non-adaptive	0.84857
Non-adaptive	0.910661
Non-adaptive	0.905271
Non-adaptive	0.77399
Non-adaptive	0.768573
Non-adaptive	0.853621
Non-adaptive	0.837201
Non-adaptive	0.851164
Non-adaptive	0.756277
Non-adaptive	0.910587
Non-adaptive	0.846119
Non-adaptive	0.914432
Non-adaptive	0.848047
Non-adaptive	0.804755
Non-adaptive	0.885495
Non-adaptive	0.840933
Non-adaptive	0.851108
Non-adaptive	0.839001
Non-adaptive	0.851577
Non-adaptive	0.805609
Non-adaptive	0.829583
Non-adaptive	0.842176
Non-adaptive	0.868724
Non-adaptive	0.798522
Non-adaptive	0.83023
Non-adaptive	0.800981
Non-adaptive	0.884944
Non-adaptive	0.852036
Non-adaptive	0.777595
Non-adaptive	0.919363
Non-adaptive	0.798113
Non-adaptive	0.884036
Non-adaptive	0.799719
Non-adaptive	0.851403
Non-adaptive	0.741197
Non-adaptive	0.874315
Non-adaptive	0.912893
Non-adaptive	0.832458
Non-adaptive	0.88655
Non-adaptive	0.901415
Non-adaptive	0.779882
Non-adaptive	0.886908
Non-adaptive	0.86492
Non-adaptive	0.881206
Non-adaptive	0.814445
Non-adaptive	0.852578
Non-adaptive	0.805206
Non-adaptive	0.88732
Non-adaptive	0.884699
Non-adaptive	0.8707
Non-adaptive	0.792732
Non-adaptive	0.847664
Non-adaptive	0.820656
Non-adaptive	0.770545
Non-adaptive	0.835916
Non-adaptive	0.880996
Non-adaptive	0.871192
Non-adaptive	0.845729
Non-adaptive	0.857102
Non-adaptive	0.832357
Non-adaptive	0.887054
Non-adaptive	0.898311
Non-adaptive	0.824505
Non-adaptive	0.832081
Non-adaptive	0.859207
Non-adaptive	0.805006
Non-adaptive	0.775314
Non-adaptive	0.804332
Non-adaptive	0.822113
Non-adaptive	0.86462
Non-adaptive	0.792243
Non-adaptive	0.798056
Non-adaptive	0.773077
Non-adaptive	0.837206
Non-adaptive	0.766577
Non-adaptive	0.868984
Non-adaptive	0.825773
Non-adaptive	0.694363
Non-adaptive	0.912444
Non-adaptive	0.793666
Non-adaptive	0.8439
Non-adaptive	0.82685
Non-adaptive	0.883452
Non-adaptive	0.846841
Non-adaptive	0.772857
Non-adaptive	0.814109
Non-adaptive	0.908567
Non-adaptive	0.850643
Non-adaptive	0.758564
Non-adaptive	0.769448
Non-adaptive	0.740547
Non-adaptive	0.684433
Non-adaptive	0.790752
Non-adaptive	0.949217
Non-adaptive	0.860697
Non-adaptive	0.924107
Non-adaptive	0.920899
Non-adaptive	0.812139
Non-adaptive	0.773294
Non-adaptive	0.925371
Non-adaptive	0.713698
Non-adaptive	0.876414
Non-adaptive	0.829202
Non-adaptive	0.728676
Non-adaptive	0.841055
Non-adaptive	0.746283
Non-adaptive	0.744633
Non-adaptive	0.919414
Non-adaptive	0.738643
Non-adaptive	0.802148
Non-adaptive	0.775659
Non-adaptive	0.778031
Non-adaptive	0.841319
Non-adaptive	0.72665
Non-adaptive	0.837731
Non-adaptive	0.856243
Non-adaptive	0.850912
Non-adaptive	0.912433
Non-adaptive	0.82679
Non-adaptive	0.821983
Non-adaptive	0.85531
Non-adaptive	0.88867
Non-adaptive	0.785861
Non-adaptive	0.91072
Non-adaptive	0.879327
Non-adaptive	0.923324
Non-adaptive	0.825584
Non-adaptive	0.835765
Non-adaptive	0.815838
Non-adaptive	0.860041
Non-adaptive	0.837016
Non-adaptive	0.88916
Non-adaptive	0.878197
Non-adaptive	0.906863
Non-adaptive	0.846697
Non-adaptive	0.696864
Non-adaptive	0.775308
Non-adaptive	0.905518
Non-adaptive	0.796193
Non-adaptive	0.839035
Non-adaptive	0.91497
Non-adaptive	0.920638
Non-adaptive	0.801065
Non-adaptive	0.882881
Non-adaptive	0.688933
Non-adaptive	0.905042
Non-adaptive	0.831338
Non-adaptive	0.842635
Non-adaptive	0.869922
Non-adaptive	0.73927
Non-adaptive	0.784194
Non-adaptive	0.764561
Non-adaptive	0.836777
Non-adaptive	0.920951
Non-adaptive	0.89662
Non-adaptive	0.900304
Non-adaptive	0.885498
Non-adaptive	0.725709
Non-adaptive	0.784741
Non-adaptive	0.86511
Non-adaptive	0.773274
Non-adaptive	0.861153
Non-adaptive	0.960784
Non-adaptive	0.805799
Non-adaptive	0.948963
Non-adaptive	0.848774
Non-adaptive	0.755139
Non-adaptive	0.822961
Non-adaptive	0.953984
Non-adaptive	0.836123
Non-adaptive	0.887289
Non-adaptive	0.712047
Non-adaptive	0.810673
Non-adaptive	0.921244
Non-adaptive	0.933795
Non-adaptive	0.903782
Non-adaptive	0.828083
Non-adaptive	0.794042
Non-adaptive	0.879672
Non-adaptive	0.698811
Non-adaptive	0.932433
Non-adaptive	0.915585
Non-adaptive	0.763164
Non-adaptive	0.874017
Non-adaptive	0.796571
Non-adaptive	0.869231
Non-adaptive	0.824045
Non-adaptive	0.75728
Non-adaptive	0.916647
Non-adaptive	0.830804
Non-adaptive	0.909683
Non-adaptive	0.812857
Non-adaptive	0.838556
Non-adaptive	0.91
Non-adaptive	0.858512
Non-adaptive	0.879387
Non-adaptive	0.697789
Non-adaptive	0.796006
Non-adaptive	0.762834
Non-adaptive	0.848451
Non-adaptive	0.792442
Non-adaptive	0.901075
Non-adaptive	0.905793
Non-adaptive	0.766654
Non-adaptive	0.826135
Non-adaptive	0.786631
Non-adaptive	0.854593
Non-adaptive	0.817201
Non-adaptive	0.857914
Non-adaptive	0.927303
Non-adaptive	0.856065
Non-adaptive	0.704196
Non-adaptive	0.824192
Non-adaptive	0.840365
Non-adaptive	0.78522
Non-adaptive	0.846946
Non-adaptive	0.885409
Non-adaptive	0.873892
Non-adaptive	0.748856
Non-adaptive	0.815907
Non-adaptive	0.784683
Non-adaptive	0.738403
Non-adaptive	0.835835
Non-adaptive	0.810439
Non-adaptive	0.879463
Non-adaptive	0.872958
Non-adaptive	0.871648
Non-adaptive	0.840612
Non-adaptive	0.830642
Non-adaptive	0.810485
Non-adaptive	0.816045
Non-adaptive	0.851074
Non-adaptive	0.74956
Non-adaptive	0.758875
Non-adaptive	0.854569
Non-adaptive	0.921912
Non-adaptive	0.853215
Non-adaptive	0.836562
Non-adaptive	0.732353
Non-adaptive	0.851411
Non-adaptive	0.81518
Non-adaptive	0.887382
Non-adaptive	0.858777
Non-adaptive	0.729196
Non-adaptive	0.781161
Non-adaptive	0.827944
Non-adaptive	0.831542
Non-adaptive	0.856048
Non-adaptive	0.815763
Non-adaptive	0.870314
Non-adaptive	0.853712
Non-adaptive	0.783998
Non-adaptive	0.867955
Non-adaptive	0.795209
Non-adaptive	0.814322
Non-adaptive	0.879014
Non-adaptive	0.79501
Non-adaptive	0.865385
Non-adaptive	0.80841
Non-adaptive	0.777568
Non-adaptive	0.902496
Non-adaptive	0.918098
Non-adaptive	0.788862
Non-adaptive	0.881965
Non-adaptive	0.904813
Non-adaptive	0.844853
Non-adaptive	0.706213
Non-adaptive	0.788572
Non-adaptive	0.849825
Non-adaptive	0.834806
Non-adaptive	0.894236
Non-adaptive	0.810315
Non-adaptive	0.855377
Non-adaptive	0.838895
Non-adaptive	0.844496
Non-adaptive	0.847023
Non-adaptive	0.913191
Non-adaptive	0.85369
Non-adaptive	0.849275
Non-adaptive	0.860506
Non-adaptive	0.879037
Non-adaptive	0.81456
Non-adaptive	0.833694
Non-adaptive	0.850789
Non-adaptive	0.814503
Non-adaptive	0.8698
Non-adaptive	0.699725
Non-adaptive	0.835632
Non-adaptive	0.74697
Non-adaptive	0.857718
Non-adaptive	0.837862
Non-adaptive	0.869626
Non-adaptive	0.775067
Non-adaptive	0.762546
Non-adaptive	0.861417
Non-adaptive	0.903083
Non-adaptive	0.684528
Non-adaptive	0.895783
Non-adaptive	0.913009
Non-adaptive	0.770953
Non-adaptive	0.786482
Non-adaptive	0.874089
Non-adaptive	0.783414
Non-adaptive	0.779401
Non-adaptive	0.764242
Non-adaptive	0.784162
Non-adaptive	0.883961
Non-adaptive	0.911115
Non-adaptive	0.816236
Non-adaptive	0.802469
Non-adaptive	0.749333
Non-adaptive	0.846621
Non-adaptive	0.892454
Non-adaptive	0.853804
Non-adaptive	0.85268
Non-adaptive	0.812583
Non-adaptive	0.760173
Non-adaptive	0.744393
Non-adaptive	0.890891
Non-adaptive	0.817691
Non-adaptive	0.842818
Non-adaptive	0.888918
Non-adaptive	0.932212
Non-adaptive	0.824783
Non-adaptive	0.724066
Non-adaptive	0.752934
Non-adaptive	0.803623
Non-adaptive	0.722953
Non-adaptive	0.855065
Non-adaptive	0.727442
Non-adaptive	0.737137
Non-adaptive	0.794446
Non-adaptive	0.869153
Non-adaptive	0.680655
Non-adaptive	0.856433
Non-adaptive	0.786341
Non-adaptive	0.863889
Non-adaptive	0.913297
Non-adaptive	0.870211
Non-adaptive	0.772477
Non-adaptive	0.830799
Non-adaptive	0.855858
Non-adaptive	0.781136
Non-adaptive	0.842601
Non-adaptive	0.775462
Non-adaptive	0.760077
Non-adaptive	0.766421
Non-adaptive	0.794643
Non-adaptive	0.922722
Non-adaptive	0.828891
Non-adaptive	0.789167
Non-adaptive	0.85711
Non-adaptive	0.779363
Non-adaptive	0.875224
Non-adaptive	0.860532
Non-adaptive	0.811903
Non-adaptive	0.93009
Non-adaptive	0.819565
Non-adaptive	0.765337
Non-adaptive	0.792252
Non-adaptive	0.89907
Non-adaptive	0.868627
Non-adaptive	0.816554
Non-adaptive	0.746015
Non-adaptive	0.887437
Non-adaptive	0.896711
Non-adaptive	0.814684
Non-adaptive	0.83857
Non-adaptive	0.835953
Non-adaptive	0.808858
Non-adaptive	0.819406
Non-adaptive	0.930217
Non-adaptive	0.815652
Non-adaptive	0.721852
Non-adaptive	0.844479
Non-adaptive	0.851571
Non-adaptive	0.788931
Non-adaptive	0.795011
Non-adaptive	0.761917
Non-adaptive	0.796746
Non-adaptive	0.807757
Non-adaptive	0.915556
Non-adaptive	0.893207
Non-adaptive	0.928126
Non-adaptive	0.861513
Non-adaptive	0.862765
Non-adaptive	0.760998
Non-adaptive	0.770258
Non-adaptive	0.810099
Non-adaptive	0.823598
Non-adaptive	0.768818
Non-adaptive	0.792167
Non-adaptive	0.743952
Non-adaptive	0.807081
Non-adaptive	0.850914
Non-adaptive	0.829668
Non-adaptive	0.837825
Non-adaptive	0.834107
Non-adaptive	0.854849
Non-adaptive	0.75718
Non-adaptive	0.839671
Non-adaptive	0.903404
Non-adaptive	0.775334
Non-adaptive	0.889082
Non-adaptive	0.794219
Non-adaptive	0.858093
Non-adaptive	0.816153
Non-adaptive	0.906325
Non-adaptive	0.903154
Non-adaptive	0.887439
Non-adaptive	0.858265
Non-adaptive	0.763007
Non-adaptive	0.864981
Non-adaptive	0.789603
Non-adaptive	0.815774
Non-adaptive	0.841889
Non-adaptive	0.829826
Non-adaptive	0.876124
Non-adaptive	0.895343
Non-adaptive	0.716935
Non-adaptive	0.750036
Non-adaptive	0.920889
Non-adaptive	0.779442
Non-adaptive	0.82981
Non-adaptive	0.71433
Non-adaptive	0.831877
Non-adaptive	0.802273
Non-adaptive	0.908868
Non-adaptive	0.895306
Non-adaptive	0.876962
Non-adaptive	0.829863
Non-adaptive	0.832046
Non-adaptive	0.771228
Non-adaptive	0.787857
Non-adaptive	0.697462
Non-adaptive	0.854762
Non-adaptive	0.814264
Non-adaptive	0.892457
Non-adaptive	0.898499
Non-adaptive	0.860193
Non-adaptive	0.903643
Non-adaptive	0.919872
Non-adaptive	0.855704
Non-adaptive	0.900299
Non-adaptive	0.889879
Non-adaptive	0.884424
Non-adaptive	0.824916
Non-adaptive	0.768432
Non-adaptive	0.937059
Non-adaptive	0.943071
Non-adaptive	0.948578
Non-adaptive	0.877813
Non-adaptive	0.861242
Non-adaptive	0.818904
Non-adaptive	0.788175
Non-adaptive	0.81514
Non-adaptive	0.869085
Non-adaptive	0.802911
Non-adaptive	0.902438
Non-adaptive	0.829846
Non-adaptive	0.794262
Non-adaptive	0.793237
Non-adaptive	0.852302
Non-adaptive	0.907193
Non-adaptive	0.844907
Non-adaptive	0.839075
Non-adaptive	0.857018
Non-adaptive	0.843251
Non-adaptive	0.810801
Non-adaptive	0.791089
Non-adaptive	0.851862
Non-adaptive	0.659226
Non-adaptive	0.811977
Non-adaptive	0.930882
Non-adaptive	0.896564
Non-adaptive	0.857262
Non-adaptive	0.811448
Non-adaptive	0.788783
Non-adaptive	0.885524
Non-adaptive	0.825827
Non-adaptive	0.844643
Non-adaptive	0.803444
Non-adaptive	0.714053
Non-adaptive	0.870654
Non-adaptive	0.915344
Non-adaptive	0.873617
Non-adaptive	0.823457
Non-adaptive	0.720201
Non-adaptive	0.84574
Non-adaptive	0.800189
Non-adaptive	0.857407
Non-adaptive	0.788701
Non-adaptive	0.862821
Non-adaptive	0.724531
Non-adaptive	0.707991
Non-adaptive	0.821441
Non-adaptive	0.885607
Non-adaptive	0.876647
Non-adaptive	0.672534
Non-adaptive	0.727858
Non-adaptive	0.818994
Non-adaptive	0.762841
Non-adaptive	0.834044
Non-adaptive	0.92479
Non-adaptive	0.816241
Non-adaptive	0.829819
Non-adaptive	0.857749
Non-adaptive	0.865055
Non-adaptive	0.781589
Non-adaptive	0.814999
Non-adaptive	0.830227
Non-adaptive	0.817402
Non-adaptive	0.852847
Non-adaptive	0.768267
Non-adaptive	0.815209
Non-adaptive	0.854289
Non-adaptive	0.832499
Non-adaptive	0.792569
Non-adaptive	0.832143
Non-adaptive	0.79066
Non-adaptive	0.851901
Non-adaptive	0.907651
Non-adaptive	0.80305
Non-adaptive	0.725156
Non-adaptive	0.863046
Non-adaptive	0.876673
Non-adaptive	0.853205
Non-adaptive	0.873178
Non-adaptive	0.698385
Non-adaptive	0.912689
Non-adaptive	0.877889
Non-adaptive	0.905201
Non-adaptive	0.806194
Non-adaptive	0.844666
Non-adaptive	0.835856
Non-adaptive	0.88662
Non-adaptive	0.8789
Non-adaptive	0.823378
Non-adaptive	0.8316
Non-adaptive	0.834938
Non-adaptive	0.759057
Non-adaptive	0.864994
Non-adaptive	0.734871
Non-adaptive	0.877367
Non-adaptive	0.815538
Non-adaptive	0.810875
Non-adaptive	0.875089
Non-adaptive	0.912845
Non-adaptive	0.808458
Non-adaptive	0.884191
Non-adaptive	0.823214
Non-adaptive	0.882122
Non-adaptive	0.781372
Non-adaptive	0.808593
Non-adaptive	0.67047
Non-adaptive	0.784884
Non-adaptive	0.816752
Non-adaptive	0.88233
Non-adaptive	0.816019
Non-adaptive	0.792238
Non-adaptive	0.832374
Non-adaptive	0.784299
Non-adaptive	0.852181
Non-adaptive	0.862071
Non-adaptive	0.894393
Non-adaptive	0.778922
Non-adaptive	0.798196
Non-adaptive	0.805488
Non-adaptive	0.80583
Non-adaptive	0.854489
Non-adaptive	0.835122
Non-adaptive	0.806629
Non-adaptive	0.857442
Non-adaptive	0.876754
Non-adaptive	0.749749
Non-adaptive	0.680976
Non-adaptive	0.939494
Non-adaptive	0.901892
Non-adaptive	0.885265
Non-adaptive	0.779172
Non-adaptive	0.856198
Non-adaptive	0.803824
Non-adaptive	0.877452
Non-adaptive	0.850063
Non-adaptive	0.800161
Non-adaptive	0.85054
Non-adaptive	0.854504
Non-adaptive	0.799483
Non-adaptive	0.802369
Non-adaptive	0.854968
Non-adaptive	0.824232
Non-adaptive	0.779299
Non-adaptive	0.83827
Non-adaptive	0.837316
Non-adaptive	0.943233
Non-adaptive	0.828376
Non-adaptive	0.661628
Non-adaptive	0.831171
Non-adaptive	0.909215
Non-adaptive	0.698982
Non-adaptive	0.828286
Non-adaptive	0.895099
Non-adaptive	0.948251
Non-adaptive	0.879663
Non-adaptive	0.911903
Non-adaptive	0.783897
Non-adaptive	0.831669
Non-adaptive	0.755115
Non-adaptive	0.799124
Non-adaptive	0.839642
Non-adaptive	0.854557
Non-adaptive	0.892107
Non-adaptive	0.708984
Non-adaptive	0.839077
Non-adaptive	0.866363
Non-adaptive	0.819988
Non-adaptive	0.815914
Non-adaptive	0.807201
Non-adaptive	0.869224
Non-adaptive	0.824124
Non-adaptive	0.912258
Non-adaptive	0.722889
Non-adaptive	0.836572
Non-adaptive	0.923936
Non-adaptive	0.765248
Non-adaptive	0.729539
Non-adaptive	0.841154
Non-adaptive	0.816737
Non-adaptive	0.802526
Non-adaptive	0.90614
Non-adaptive	0.914352
Non-adaptive	0.897744
Non-adaptive	0.881882
Non-adaptive	0.872773
Non-adaptive	0.827797
Non-adaptive	0.766261
Non-adaptive	0.850774
Non-adaptive	0.83289
Non-adaptive	0.750827
Non-adaptive	0.887588
Non-adaptive	0.847222
Non-adaptive	0.683539
Non-adaptive	0.80594
Non-adaptive	0.815366
Non-adaptive	0.854009
Non-adaptive	0.799525
Non-adaptive	0.822419
Non-adaptive	0.91732
Non-adaptive	0.899285
Non-adaptive	0.896057
Non-adaptive	0.905975
Non-adaptive	0.84308
Non-adaptive	0.889111
Non-adaptive	0.867641
Non-adaptive	0.857182
Non-adaptive	0.846113
Non-adaptive	0.826948
Non-adaptive	0.92223
Non-adaptive	0.830558
Non-adaptive	0.904625
Non-adaptive	0.760767
Non-adaptive	0.81377
Non-adaptive	0.784308
Non-adaptive	0.80131
Non-adaptive	0.865428
Non-adaptive	0.801067
Non-adaptive	0.754653
Non-adaptive	0.798951
Non-adaptive	0.801102
Non-adaptive	0.838938
Non-adaptive	0.937835
Non-adaptive	0.773217
Non-adaptive	0.871516
Non-adaptive	0.879522
Non-adaptive	0.955185
Non-adaptive	0.859525
Non-adaptive	0.851804
Non-adaptive	0.852581
Non-adaptive	0.825167
Non-adaptive	0.89631
Non-adaptive	0.87983
Non-adaptive	0.794767
Non-adaptive	0.654202
Non-adaptive	0.861597
Non-adaptive	0.797956
Non-adaptive	0.765919
Non-adaptive	0.81992
Non-adaptive	0.720965
Non-adaptive	0.850093
Non-adaptive	0.814845
Non-adaptive	0.827545
Non-adaptive	0.900231
Non-adaptive	0.817935
Non-adaptive	0.868133
Non-adaptive	0.882447
Non-adaptive	0.768688
Non-adaptive	0.838351
Non-adaptive	0.90724
Non-adaptive	0.836072
Non-adaptive	0.842949
Non-adaptive	0.831165
Non-adaptive	0.76717
Non-adaptive	0.839706
Non-adaptive	0.797408
Non-adaptive	0.749616
Non-adaptive	0.740258
Non-adaptive	0.853527
Non-adaptive	0.921417
Non-adaptive	0.889566
Non-adaptive	0.921711
Non-adaptive	0.793469
Non-adaptive	0.756118
Non-adaptive	0.812807
Non-adaptive	0.794106
Non-adaptive	0.883814
Non-adaptive	0.87999
Non-adaptive	0.840939
Non-adaptive	0.913294
Non-adaptive	0.792713
Non-adaptive	0.695359
Non-adaptive	0.840789
Non-adaptive	0.853998
Non-adaptive	0.808812
Non-adaptive	0.869338
Non-adaptive	0.871889
Non-adaptive	0.966323
Non-adaptive	0.844288
Non-adaptive	0.870249
Non-adaptive	0.827635
Non-adaptive	0.923144
Non-adaptive	0.754543
Non-adaptive	0.810018
Non-adaptive	0.849008
Non-adaptive	0.833886
Non-adaptive	0.895353
Non-adaptive	0.804974
Non-adaptive	0.822836
Non-adaptive	0.766536
Non-adaptive	0.735707
Non-adaptive	0.839985
Non-adaptive	0.819018
Non-adaptive	0.83168
Non-adaptive	0.783386
Non-adaptive	0.860417
Non-adaptive	0.834458
Non-adaptive	0.831881
Non-adaptive	0.827253
Non-adaptive	0.81606
Non-adaptive	0.871525
Non-adaptive	0.764407
Non-adaptive	0.795706
Non-adaptive	0.828595
Non-adaptive	0.87018
Non-adaptive	0.713221
Non-adaptive	0.76257
Non-adaptive	0.830196
Non-adaptive	0.848587
Non-adaptive	0.82368
Non-adaptive	0.878606
Non-adaptive	0.88716
Non-adaptive	0.910608
Non-adaptive	0.7656
Non-adaptive	0.800845
Non-adaptive	0.751034
Non-adaptive	0.968326
Non-adaptive	0.799736
Non-adaptive	0.678659
Non-adaptive	0.759551
Non-adaptive	0.849591
Non-adaptive	0.847528
[truncated: 8,002 more rows]

## Sheet: Figure 5D
Figure 5D. Allelic similarity between Par_N16 and SNPs with significant FST implicated as adaptive to South American lowland landraces. Adaptive, from a list of 390 adaptive SNPs; Non-adaptive, from random lists of 20 non adaptive SNPs.
Group	Proportion
Adaptive	0.705044
Non-adaptive	0.866295
Non-adaptive	0.780822
Non-adaptive	0.783239
Non-adaptive	0.806151
Non-adaptive	0.703626
Non-adaptive	0.859822
Non-adaptive	0.777464
Non-adaptive	0.81832
Non-adaptive	0.77291
Non-adaptive	0.860526
Non-adaptive	0.834683
Non-adaptive	0.796332
Non-adaptive	0.94375
Non-adaptive	0.74776
Non-adaptive	0.82557
Non-adaptive	0.803647
Non-adaptive	0.779252
Non-adaptive	0.830124
Non-adaptive	0.841683
Non-adaptive	0.870944
Non-adaptive	0.804596
Non-adaptive	0.781152
Non-adaptive	0.796389
Non-adaptive	0.920098
Non-adaptive	0.776005
Non-adaptive	0.880833
Non-adaptive	0.815689
Non-adaptive	0.716503
Non-adaptive	0.858195
Non-adaptive	0.867741
Non-adaptive	0.88468
Non-adaptive	0.753189
Non-adaptive	0.807889
Non-adaptive	0.726864
Non-adaptive	0.849884
Non-adaptive	0.804331
Non-adaptive	0.798205
Non-adaptive	0.739267
Non-adaptive	0.904123
Non-adaptive	0.792137
Non-adaptive	0.786111
Non-adaptive	0.824772
Non-adaptive	0.741768
Non-adaptive	0.799833
Non-adaptive	0.903029
Non-adaptive	0.683558
Non-adaptive	0.847201
Non-adaptive	0.831978
Non-adaptive	0.812086
Non-adaptive	0.728828
Non-adaptive	0.818755
Non-adaptive	0.73087
Non-adaptive	0.863907
Non-adaptive	0.838161
Non-adaptive	0.732565
Non-adaptive	0.727683
Non-adaptive	0.783818
Non-adaptive	0.867932
Non-adaptive	0.845899
Non-adaptive	0.774417
Non-adaptive	0.713332
Non-adaptive	0.821289
Non-adaptive	0.857562
Non-adaptive	0.820873
Non-adaptive	0.696263
Non-adaptive	0.913205
Non-adaptive	0.737921
Non-adaptive	0.775119
Non-adaptive	0.786335
Non-adaptive	0.802881
Non-adaptive	0.834514
Non-adaptive	0.756056
Non-adaptive	0.84752
Non-adaptive	0.735505
Non-adaptive	0.839719
Non-adaptive	0.791625
Non-adaptive	0.751726
Non-adaptive	0.753064
Non-adaptive	0.802879
Non-adaptive	0.74343
Non-adaptive	0.828134
Non-adaptive	0.820285
Non-adaptive	0.775659
Non-adaptive	0.900466
Non-adaptive	0.83599
Non-adaptive	0.837578
Non-adaptive	0.746615
Non-adaptive	0.677447
Non-adaptive	0.783855
Non-adaptive	0.83002
Non-adaptive	0.80625
Non-adaptive	0.952381
Non-adaptive	0.793962
Non-adaptive	0.81091
Non-adaptive	0.73337
Non-adaptive	0.739418
Non-adaptive	0.901852
Non-adaptive	0.773042
Non-adaptive	0.809583
Non-adaptive	0.873346
Non-adaptive	0.72142
Non-adaptive	0.83164
Non-adaptive	0.823622
Non-adaptive	0.889134
Non-adaptive	0.880645
Non-adaptive	0.816883
Non-adaptive	0.919552
Non-adaptive	0.711322
Non-adaptive	0.881376
Non-adaptive	0.700064
Non-adaptive	0.949928
Non-adaptive	0.864634
Non-adaptive	0.807186
Non-adaptive	0.778116
Non-adaptive	0.888468
Non-adaptive	0.752589
Non-adaptive	0.782815
Non-adaptive	0.958466
Non-adaptive	0.776138
Non-adaptive	0.808114
Non-adaptive	0.821271
Non-adaptive	0.83873
Non-adaptive	0.754839
Non-adaptive	0.824759
Non-adaptive	0.858685
Non-adaptive	0.828958
Non-adaptive	0.891629
Non-adaptive	0.894214
Non-adaptive	0.867202
Non-adaptive	0.809049
Non-adaptive	0.7544
Non-adaptive	0.814997
Non-adaptive	0.713752
Non-adaptive	0.738596
Non-adaptive	0.918958
Non-adaptive	0.832881
Non-adaptive	0.790086
Non-adaptive	0.780152
Non-adaptive	0.786519
Non-adaptive	0.811564
Non-adaptive	0.789685
Non-adaptive	0.928383
Non-adaptive	0.804326
Non-adaptive	0.900029
Non-adaptive	0.775834
Non-adaptive	0.867957
Non-adaptive	0.802976
Non-adaptive	0.797215
Non-adaptive	0.852934
Non-adaptive	0.733131
Non-adaptive	0.817982
Non-adaptive	0.851318
Non-adaptive	0.68479
Non-adaptive	0.866016
Non-adaptive	0.752466
Non-adaptive	0.747931
Non-adaptive	0.825287
Non-adaptive	0.754533
Non-adaptive	0.733686
Non-adaptive	0.840171
Non-adaptive	0.777083
Non-adaptive	0.882168
Non-adaptive	0.736245
Non-adaptive	0.860807
Non-adaptive	0.77399
Non-adaptive	0.70407
Non-adaptive	0.768797
Non-adaptive	0.777956
Non-adaptive	0.80456
Non-adaptive	0.720107
Non-adaptive	0.828487
Non-adaptive	0.745677
Non-adaptive	0.796871
Non-adaptive	0.863759
Non-adaptive	0.779523
Non-adaptive	0.73579
Non-adaptive	0.699645
Non-adaptive	0.768593
Non-adaptive	0.81862
Non-adaptive	0.820874
Non-adaptive	0.847609
Non-adaptive	0.75692
Non-adaptive	0.916005
Non-adaptive	0.804962
Non-adaptive	0.777304
Non-adaptive	0.78145
Non-adaptive	0.749594
Non-adaptive	0.848539
Non-adaptive	0.824169
Non-adaptive	0.766137
Non-adaptive	0.724065
Non-adaptive	0.823904
Non-adaptive	0.814704
Non-adaptive	0.861905
Non-adaptive	0.758394
Non-adaptive	0.786264
Non-adaptive	0.852924
Non-adaptive	0.76145
Non-adaptive	0.774773
Non-adaptive	0.825775
Non-adaptive	0.820975
Non-adaptive	0.840502
Non-adaptive	0.822036
Non-adaptive	0.871022
Non-adaptive	0.819877
Non-adaptive	0.801017
Non-adaptive	0.696219
Non-adaptive	0.724443
Non-adaptive	0.82964
Non-adaptive	0.804425
Non-adaptive	0.910306
Non-adaptive	0.818008
Non-adaptive	0.804269
Non-adaptive	0.836811
Non-adaptive	0.745937
Non-adaptive	0.696919
Non-adaptive	0.811343
Non-adaptive	0.847186
Non-adaptive	0.767867
Non-adaptive	0.874854
Non-adaptive	0.767777
Non-adaptive	0.888952
Non-adaptive	0.870774
Non-adaptive	0.8104
Non-adaptive	0.773662
Non-adaptive	0.837887
Non-adaptive	0.849783
Non-adaptive	0.842102
Non-adaptive	0.834105
Non-adaptive	0.737775
Non-adaptive	0.832578
Non-adaptive	0.808592
Non-adaptive	0.898085
Non-adaptive	0.87644
Non-adaptive	0.919001
Non-adaptive	0.825946
Non-adaptive	0.707033
Non-adaptive	0.762869
Non-adaptive	0.823983
Non-adaptive	0.897064
Non-adaptive	0.853699
Non-adaptive	0.749328
Non-adaptive	0.802746
Non-adaptive	0.832474
Non-adaptive	0.84964
Non-adaptive	0.79423
Non-adaptive	0.786227
Non-adaptive	0.825549
Non-adaptive	0.757728
Non-adaptive	0.722874
Non-adaptive	0.781361
Non-adaptive	0.844897
Non-adaptive	0.827817
Non-adaptive	0.702799
Non-adaptive	0.682207
Non-adaptive	0.79013
Non-adaptive	0.820541
Non-adaptive	0.737575
Non-adaptive	0.802127
Non-adaptive	0.778657
Non-adaptive	0.831058
Non-adaptive	0.842185
Non-adaptive	0.823099
Non-adaptive	0.79887
Non-adaptive	0.851528
Non-adaptive	0.809077
Non-adaptive	0.841437
Non-adaptive	0.820992
Non-adaptive	0.751192
Non-adaptive	0.821381
Non-adaptive	0.726781
Non-adaptive	0.823361
Non-adaptive	0.853482
Non-adaptive	0.763386
Non-adaptive	0.836164
Non-adaptive	0.740429
Non-adaptive	0.825636
Non-adaptive	0.783541
Non-adaptive	0.895225
Non-adaptive	0.817079
Non-adaptive	0.938237
Non-adaptive	0.772857
Non-adaptive	0.837531
Non-adaptive	0.939119
Non-adaptive	0.892183
Non-adaptive	0.854646
Non-adaptive	0.822503
Non-adaptive	0.954902
Non-adaptive	0.775411
Non-adaptive	0.717143
Non-adaptive	0.873132
Non-adaptive	0.830433
Non-adaptive	0.84906
Non-adaptive	0.806778
Non-adaptive	0.849935
Non-adaptive	0.842035
Non-adaptive	0.849062
Non-adaptive	0.830637
Non-adaptive	0.733962
Non-adaptive	0.817532
Non-adaptive	0.912286
Non-adaptive	0.68019
Non-adaptive	0.760266
Non-adaptive	0.861989
Non-adaptive	0.674986
Non-adaptive	0.842687
Non-adaptive	0.845196
Non-adaptive	0.835308
Non-adaptive	0.778559
Non-adaptive	0.787934
Non-adaptive	0.804678
Non-adaptive	0.855899
Non-adaptive	0.843561
Non-adaptive	0.750617
Non-adaptive	0.876963
Non-adaptive	0.869977
Non-adaptive	0.813835
Non-adaptive	0.765712
Non-adaptive	0.820593
Non-adaptive	0.831526
Non-adaptive	0.814793
Non-adaptive	0.789049
Non-adaptive	0.748676
Non-adaptive	0.742501
Non-adaptive	0.802594
Non-adaptive	0.807738
Non-adaptive	0.74026
Non-adaptive	0.856186
Non-adaptive	0.769773
Non-adaptive	0.832513
Non-adaptive	0.895495
Non-adaptive	0.775676
Non-adaptive	0.690719
Non-adaptive	0.872402
Non-adaptive	0.66183
Non-adaptive	0.829306
Non-adaptive	0.847176
Non-adaptive	0.85526
Non-adaptive	0.85226
Non-adaptive	0.913701
Non-adaptive	0.754795
Non-adaptive	0.862531
Non-adaptive	0.760552
Non-adaptive	0.851257
Non-adaptive	0.831705
Non-adaptive	0.705096
Non-adaptive	0.715563
Non-adaptive	0.828316
Non-adaptive	0.753703
Non-adaptive	0.787024
Non-adaptive	0.774069
Non-adaptive	0.826631
Non-adaptive	0.828889
Non-adaptive	0.764496
Non-adaptive	0.882915
Non-adaptive	0.771113
Non-adaptive	0.798656
Non-adaptive	0.84269
Non-adaptive	0.777975
Non-adaptive	0.819922
Non-adaptive	0.759969
Non-adaptive	0.784358
Non-adaptive	0.768018
Non-adaptive	0.742974
Non-adaptive	0.87712
Non-adaptive	0.942466
Non-adaptive	0.680018
Non-adaptive	0.703321
Non-adaptive	0.782796
Non-adaptive	0.88882
Non-adaptive	0.840391
Non-adaptive	0.83658
Non-adaptive	0.884512
Non-adaptive	0.734767
Non-adaptive	0.829054
Non-adaptive	0.731075
Non-adaptive	0.877713
Non-adaptive	0.916165
Non-adaptive	0.746634
Non-adaptive	0.87125
Non-adaptive	0.779652
Non-adaptive	0.777925
Non-adaptive	0.806194
Non-adaptive	0.836876
Non-adaptive	0.903186
Non-adaptive	0.918691
Non-adaptive	0.825621
Non-adaptive	0.731651
Non-adaptive	0.821491
Non-adaptive	0.849008
Non-adaptive	0.745912
Non-adaptive	0.865327
Non-adaptive	0.751692
Non-adaptive	0.806793
Non-adaptive	0.777595
Non-adaptive	0.613727
Non-adaptive	0.782826
Non-adaptive	0.843937
Non-adaptive	0.833594
Non-adaptive	0.754502
Non-adaptive	0.836228
Non-adaptive	0.7595
Non-adaptive	0.789591
Non-adaptive	0.827432
Non-adaptive	0.741444
Non-adaptive	0.758464
Non-adaptive	0.766319
Non-adaptive	0.861586
Non-adaptive	0.850507
Non-adaptive	0.908053
Non-adaptive	0.800794
Non-adaptive	0.788798
Non-adaptive	0.76221
Non-adaptive	0.817783
Non-adaptive	0.854595
Non-adaptive	0.722534
Non-adaptive	0.901389
Non-adaptive	0.830046
Non-adaptive	0.788331
Non-adaptive	0.883845
Non-adaptive	0.849219
Non-adaptive	0.90751
Non-adaptive	0.85982
Non-adaptive	0.829002
Non-adaptive	0.889558
Non-adaptive	0.809482
Non-adaptive	0.870298
Non-adaptive	0.715771
Non-adaptive	0.748776
Non-adaptive	0.86493
Non-adaptive	0.728602
Non-adaptive	0.793732
Non-adaptive	0.879937
Non-adaptive	0.71015
Non-adaptive	0.748042
Non-adaptive	0.791512
Non-adaptive	0.83606
Non-adaptive	0.786629
Non-adaptive	0.849055
Non-adaptive	0.835141
Non-adaptive	0.798525
Non-adaptive	0.768009
Non-adaptive	0.844974
Non-adaptive	0.766413
Non-adaptive	0.841469
Non-adaptive	0.853282
Non-adaptive	0.837918
Non-adaptive	0.790841
Non-adaptive	0.761335
Non-adaptive	0.847595
Non-adaptive	0.8805
Non-adaptive	0.846809
Non-adaptive	0.839947
Non-adaptive	0.838363
Non-adaptive	0.864029
Non-adaptive	0.82222
Non-adaptive	0.831829
Non-adaptive	0.73191
Non-adaptive	0.883739
Non-adaptive	0.810516
Non-adaptive	0.834803
Non-adaptive	0.77576
Non-adaptive	0.711266
Non-adaptive	0.832121
Non-adaptive	0.881807
Non-adaptive	0.782492
Non-adaptive	0.79838
Non-adaptive	0.806326
Non-adaptive	0.788194
Non-adaptive	0.844187
Non-adaptive	0.885025
Non-adaptive	0.877745
Non-adaptive	0.838234
Non-adaptive	0.784253
Non-adaptive	0.839035
Non-adaptive	0.71929
Non-adaptive	0.810969
Non-adaptive	0.851862
Non-adaptive	0.714352
Non-adaptive	0.869663
Non-adaptive	0.805209
Non-adaptive	0.86709
Non-adaptive	0.724485
Non-adaptive	0.814396
Non-adaptive	0.808571
Non-adaptive	0.799934
Non-adaptive	0.873663
Non-adaptive	0.804407
Non-adaptive	0.845337
Non-adaptive	0.854056
Non-adaptive	0.78457
Non-adaptive	0.89582
Non-adaptive	0.84411
Non-adaptive	0.901032
Non-adaptive	0.804139
Non-adaptive	0.825823
Non-adaptive	0.741113
Non-adaptive	0.897194
Non-adaptive	0.853744
Non-adaptive	0.807872
Non-adaptive	0.736683
Non-adaptive	0.842363
Non-adaptive	0.731739
Non-adaptive	0.88197
Non-adaptive	0.827352
Non-adaptive	0.803195
Non-adaptive	0.874221
Non-adaptive	0.869851
Non-adaptive	0.720435
Non-adaptive	0.814021
Non-adaptive	0.805049
Non-adaptive	0.821898
Non-adaptive	0.764474
Non-adaptive	0.852969
Non-adaptive	0.810998
Non-adaptive	0.802069
Non-adaptive	0.798665
Non-adaptive	0.831917
Non-adaptive	0.771746
Non-adaptive	0.777072
Non-adaptive	0.850073
Non-adaptive	0.749054
Non-adaptive	0.788912
Non-adaptive	0.814687
Non-adaptive	0.811232
Non-adaptive	0.895761
Non-adaptive	0.855309
Non-adaptive	0.81585
Non-adaptive	0.663148
Non-adaptive	0.824339
Non-adaptive	0.75601
Non-adaptive	0.87534
Non-adaptive	0.844113
Non-adaptive	0.89401
Non-adaptive	0.832907
Non-adaptive	0.877901
Non-adaptive	0.816243
Non-adaptive	0.730152
Non-adaptive	0.823243
Non-adaptive	0.729762
Non-adaptive	0.79127
Non-adaptive	0.827829
Non-adaptive	0.766038
Non-adaptive	0.89693
Non-adaptive	0.714693
Non-adaptive	0.805952
Non-adaptive	0.832542
Non-adaptive	0.747795
Non-adaptive	0.856181
Non-adaptive	0.823633
Non-adaptive	0.743841
Non-adaptive	0.799233
Non-adaptive	0.811835
Non-adaptive	0.831156
Non-adaptive	0.784161
Non-adaptive	0.820875
Non-adaptive	0.817725
Non-adaptive	0.834597
Non-adaptive	0.718902
Non-adaptive	0.835938
Non-adaptive	0.750714
Non-adaptive	0.741817
Non-adaptive	0.86643
Non-adaptive	0.760232
Non-adaptive	0.897934
Non-adaptive	0.758492
Non-adaptive	0.714888
Non-adaptive	0.780185
Non-adaptive	0.852087
Non-adaptive	0.780112
Non-adaptive	0.758254
Non-adaptive	0.923267
Non-adaptive	0.84256
Non-adaptive	0.783503
Non-adaptive	0.879318
Non-adaptive	0.878388
Non-adaptive	0.869048
Non-adaptive	0.813857
Non-adaptive	0.821805
Non-adaptive	0.809551
Non-adaptive	0.842157
Non-adaptive	0.763312
Non-adaptive	0.734952
Non-adaptive	0.871904
Non-adaptive	0.740763
Non-adaptive	0.760797
Non-adaptive	0.822225
Non-adaptive	0.712232
Non-adaptive	0.897417
Non-adaptive	0.760068
Non-adaptive	0.809729
Non-adaptive	0.850278
Non-adaptive	0.836942
Non-adaptive	0.798865
Non-adaptive	0.923363
Non-adaptive	0.800086
Non-adaptive	0.878173
Non-adaptive	0.853789
Non-adaptive	0.757404
Non-adaptive	0.822299
Non-adaptive	0.892432
Non-adaptive	0.837861
Non-adaptive	0.868024
Non-adaptive	0.85002
Non-adaptive	0.821139
Non-adaptive	0.878958
Non-adaptive	0.877591
Non-adaptive	0.779926
Non-adaptive	0.801578
Non-adaptive	0.816374
Non-adaptive	0.819473
Non-adaptive	0.80257
Non-adaptive	0.758695
Non-adaptive	0.757341
Non-adaptive	0.843979
Non-adaptive	0.897421
Non-adaptive	0.788268
Non-adaptive	0.823723
Non-adaptive	0.847597
Non-adaptive	0.880079
Non-adaptive	0.842376
Non-adaptive	0.857257
Non-adaptive	0.732358
Non-adaptive	0.881168
Non-adaptive	0.768827
Non-adaptive	0.824049
Non-adaptive	0.828009
Non-adaptive	0.83429
Non-adaptive	0.854328
Non-adaptive	0.715672
Non-adaptive	0.792891
Non-adaptive	0.856267
Non-adaptive	0.807381
Non-adaptive	0.782701
Non-adaptive	0.873906
Non-adaptive	0.860474
Non-adaptive	0.720447
Non-adaptive	0.780807
Non-adaptive	0.854738
Non-adaptive	0.743341
Non-adaptive	0.805071
Non-adaptive	0.905316
Non-adaptive	0.831427
Non-adaptive	0.767593
Non-adaptive	0.747874
Non-adaptive	0.826509
Non-adaptive	0.772755
Non-adaptive	0.842489
Non-adaptive	0.790009
Non-adaptive	0.797465
Non-adaptive	0.882284
Non-adaptive	0.593533
Non-adaptive	0.744441
Non-adaptive	0.835099
Non-adaptive	0.800506
Non-adaptive	0.795527
Non-adaptive	0.88071
Non-adaptive	0.850693
Non-adaptive	0.781487
Non-adaptive	0.801772
Non-adaptive	0.808091
Non-adaptive	0.745177
Non-adaptive	0.797807
Non-adaptive	0.892857
Non-adaptive	0.816856
Non-adaptive	0.90779
Non-adaptive	0.834262
Non-adaptive	0.612044
Non-adaptive	0.913563
Non-adaptive	0.816231
Non-adaptive	0.893634
Non-adaptive	0.871879
Non-adaptive	0.866849
Non-adaptive	0.721156
Non-adaptive	0.73664
Non-adaptive	0.83469
Non-adaptive	0.826765
Non-adaptive	0.866088
Non-adaptive	0.887412
Non-adaptive	0.83053
Non-adaptive	0.763556
Non-adaptive	0.756008
Non-adaptive	0.754141
Non-adaptive	0.865871
Non-adaptive	0.7475
Non-adaptive	0.867688
Non-adaptive	0.810782
Non-adaptive	0.840339
Non-adaptive	0.81964
Non-adaptive	0.831008
Non-adaptive	0.794075
Non-adaptive	0.824123
Non-adaptive	0.790299
Non-adaptive	0.828336
Non-adaptive	0.765278
Non-adaptive	0.814094
Non-adaptive	0.791694
Non-adaptive	0.716437
Non-adaptive	0.781386
Non-adaptive	0.772626
Non-adaptive	0.741646
Non-adaptive	0.923572
Non-adaptive	0.890909
Non-adaptive	0.817626
Non-adaptive	0.827468
Non-adaptive	0.846305
Non-adaptive	0.777103
Non-adaptive	0.78449
Non-adaptive	0.846121
Non-adaptive	0.828874
Non-adaptive	0.78381
Non-adaptive	0.824919
Non-adaptive	0.774058
Non-adaptive	0.852624
Non-adaptive	0.741102
Non-adaptive	0.762577
Non-adaptive	0.7905
Non-adaptive	0.838254
Non-adaptive	0.854101
Non-adaptive	0.807247
Non-adaptive	0.858201
Non-adaptive	0.797999
Non-adaptive	0.810675
Non-adaptive	0.716309
Non-adaptive	0.735382
Non-adaptive	0.754741
Non-adaptive	0.921437
Non-adaptive	0.757624
Non-adaptive	0.778622
Non-adaptive	0.831837
Non-adaptive	0.878755
Non-adaptive	0.753263
Non-adaptive	0.836979
Non-adaptive	0.844618
Non-adaptive	0.816951
Non-adaptive	0.768017
Non-adaptive	0.801452
Non-adaptive	0.899327
Non-adaptive	0.836625
Non-adaptive	0.794471
Non-adaptive	0.792759
Non-adaptive	0.849357
Non-adaptive	0.829704
Non-adaptive	0.791377
Non-adaptive	0.83619
Non-adaptive	0.897969
Non-adaptive	0.81927
Non-adaptive	0.925174
Non-adaptive	0.916407
Non-adaptive	0.774278
Non-adaptive	0.809697
Non-adaptive	0.767046
Non-adaptive	0.890976
Non-adaptive	0.737566
Non-adaptive	0.729355
Non-adaptive	0.87612
Non-adaptive	0.786806
Non-adaptive	0.898942
Non-adaptive	0.841259
Non-adaptive	0.853277
Non-adaptive	0.884407
Non-adaptive	0.817913
Non-adaptive	0.774504
Non-adaptive	0.709732
Non-adaptive	0.846618
Non-adaptive	0.842431
Non-adaptive	0.70312
Non-adaptive	0.787797
Non-adaptive	0.881315
Non-adaptive	0.867483
Non-adaptive	0.823202
Non-adaptive	0.800281
Non-adaptive	0.718288
Non-adaptive	0.901177
Non-adaptive	0.811198
Non-adaptive	0.773699
Non-adaptive	0.830069
Non-adaptive	0.90602
Non-adaptive	0.855313
Non-adaptive	0.796914
Non-adaptive	0.723154
Non-adaptive	0.798814
Non-adaptive	0.855834
Non-adaptive	0.843897
Non-adaptive	0.790142
Non-adaptive	0.842128
Non-adaptive	0.758057
Non-adaptive	0.785701
Non-adaptive	0.720608
Non-adaptive	0.720789
Non-adaptive	0.824867
Non-adaptive	0.798685
Non-adaptive	0.80328
Non-adaptive	0.916868
Non-adaptive	0.789571
Non-adaptive	0.835993
Non-adaptive	0.835876
Non-adaptive	0.894843
Non-adaptive	0.767419
Non-adaptive	0.883438
Non-adaptive	0.886239
Non-adaptive	0.895358
Non-adaptive	0.749825
Non-adaptive	0.777064
Non-adaptive	0.903195
Non-adaptive	0.82926
Non-adaptive	0.797756
Non-adaptive	0.875453
Non-adaptive	0.882684
Non-adaptive	0.829622
Non-adaptive	0.767022
Non-adaptive	0.760004
Non-adaptive	0.792852
Non-adaptive	0.800096
Non-adaptive	0.873869
Non-adaptive	0.865028
Non-adaptive	0.799669
Non-adaptive	0.867742
Non-adaptive	0.838554
Non-adaptive	0.823342
Non-adaptive	0.818602
Non-adaptive	0.919653
Non-adaptive	0.707962
Non-adaptive	0.83837
Non-adaptive	0.811672
Non-adaptive	0.819366
Non-adaptive	0.755127
Non-adaptive	0.883961
Non-adaptive	0.869891
Non-adaptive	0.843353
Non-adaptive	0.735146
Non-adaptive	0.772629
Non-adaptive	0.753978
Non-adaptive	0.806412
Non-adaptive	0.727261
Non-adaptive	0.841715
Non-adaptive	0.803345
Non-adaptive	0.800117
Non-adaptive	0.802497
Non-adaptive	0.899032
Non-adaptive	0.844167
Non-adaptive	0.822024
Non-adaptive	0.71511
Non-adaptive	0.794665
Non-adaptive	0.814495
Non-adaptive	0.810483
Non-adaptive	0.807374
Non-adaptive	0.752652
Non-adaptive	0.818358
Non-adaptive	0.753518
Non-adaptive	0.80159
Non-adaptive	0.844444
Non-adaptive	0.891667
Non-adaptive	0.788613
Non-adaptive	0.819677
Non-adaptive	0.725252
Non-adaptive	0.675147
Non-adaptive	0.786417
Non-adaptive	0.741285
Non-adaptive	0.837303
Non-adaptive	0.800712
Non-adaptive	0.818706
Non-adaptive	0.908973
Non-adaptive	0.795717
Non-adaptive	0.831155
Non-adaptive	0.734327
Non-adaptive	0.866601
Non-adaptive	0.834974
Non-adaptive	0.940076
Non-adaptive	0.720606
Non-adaptive	0.793391
Non-adaptive	0.777496
Non-adaptive	0.934407
Non-adaptive	0.850794
Non-adaptive	0.853894
Non-adaptive	0.823417
Non-adaptive	0.788739
Non-adaptive	0.842523
Non-adaptive	0.766322
Non-adaptive	0.787847
Non-adaptive	0.763988
Non-adaptive	0.762379
Non-adaptive	0.858442
Non-adaptive	0.794567
Non-adaptive	0.805494
Non-adaptive	0.82681
Non-adaptive	0.862428
Non-adaptive	0.704103
Non-adaptive	0.843212
Non-adaptive	0.835828
Non-adaptive	0.710373
Non-adaptive	0.679981
Non-adaptive	0.84979
Non-adaptive	0.773851
Non-adaptive	0.748488
Non-adaptive	0.794267
Non-adaptive	0.783678
Non-adaptive	0.887377
Non-adaptive	0.78756
Non-adaptive	0.784165
Non-adaptive	0.880114
Non-adaptive	0.885478
Non-adaptive	0.704275
Non-adaptive	0.778448
Non-adaptive	0.856734
Non-adaptive	0.814581
Non-adaptive	0.847797
Non-adaptive	0.93353
Non-adaptive	0.82404
Non-adaptive	0.917438
Non-adaptive	0.867869
Non-adaptive	0.846324
Non-adaptive	0.868083
Non-adaptive	0.800146
Non-adaptive	0.80373
Non-adaptive	0.902898
Non-adaptive	0.856662
Non-adaptive	0.860034
Non-adaptive	0.731142
Non-adaptive	0.783741
Non-adaptive	0.772175
Non-adaptive	0.866228
Non-adaptive	0.868004
Non-adaptive	0.867157
Non-adaptive	0.901757
Non-adaptive	0.815387
Non-adaptive	0.830005
Non-adaptive	0.799696
Non-adaptive	0.854774
Non-adaptive	0.746603
Non-adaptive	0.918329
Non-adaptive	0.854405
Non-adaptive	0.844663
Non-adaptive	0.842712
Non-adaptive	0.750102
Non-adaptive	0.882135
Non-adaptive	0.872083
Non-adaptive	0.782063
Non-adaptive	0.743441
Non-adaptive	0.723917
Non-adaptive	0.798855
Non-adaptive	0.86088
Non-adaptive	0.861498
Non-adaptive	0.813066
Non-adaptive	0.791478
Non-adaptive	0.846429
Non-adaptive	0.752584
Non-adaptive	0.837948
Non-adaptive	0.776329
Non-adaptive	0.718902
Non-adaptive	0.928266
Non-adaptive	0.883499
Non-adaptive	0.758482
Non-adaptive	0.747504
Non-adaptive	0.767628
Non-adaptive	0.921026
Non-adaptive	0.692274
Non-adaptive	0.81552
Non-adaptive	0.742297
Non-adaptive	0.804727
Non-adaptive	0.835947
Non-adaptive	0.643146
Non-adaptive	0.854739
Non-adaptive	0.81234
Non-adaptive	0.84498
Non-adaptive	0.83115
Non-adaptive	0.925
Non-adaptive	0.81188
Non-adaptive	0.751734
Non-adaptive	0.887719
Non-adaptive	0.807257
Non-adaptive	0.739738
Non-adaptive	0.855281
Non-adaptive	0.847575
Non-adaptive	0.840346
Non-adaptive	0.852293
Non-adaptive	0.720781
Non-adaptive	0.755401
Non-adaptive	0.776429
Non-adaptive	0.892249
Non-adaptive	0.837981
Non-adaptive	0.771014
Non-adaptive	0.814911
Non-adaptive	0.75506
Non-adaptive	0.757593
Non-adaptive	0.783381
Non-adaptive	0.674024
Non-adaptive	0.877971
Non-adaptive	0.780625
Non-adaptive	0.798986
Non-adaptive	0.837948
Non-adaptive	0.70094
Non-adaptive	0.866114
Non-adaptive	0.723564
Non-adaptive	0.818685
Non-adaptive	0.858625
Non-adaptive	0.811991
Non-adaptive	0.738898
Non-adaptive	0.818736
Non-adaptive	0.725522
Non-adaptive	0.832705
Non-adaptive	0.917842
Non-adaptive	0.699548
Non-adaptive	0.645074
Non-adaptive	0.770732
Non-adaptive	0.820819
Non-adaptive	0.84495
Non-adaptive	0.823464
Non-adaptive	0.865091
Non-adaptive	0.842638
Non-adaptive	0.812599
Non-adaptive	0.813889
Non-adaptive	0.768503
Non-adaptive	0.783756
Non-adaptive	0.814612
Non-adaptive	0.841784
Non-adaptive	0.812931
Non-adaptive	0.875515
Non-adaptive	0.787136
Non-adaptive	0.807395
Non-adaptive	0.710789
Non-adaptive	0.816832
Non-adaptive	0.852579
Non-adaptive	0.757924
Non-adaptive	0.784762
Non-adaptive	0.708366
Non-adaptive	0.750439
Non-adaptive	0.873775
Non-adaptive	0.896326
Non-adaptive	0.874473
Non-adaptive	0.719191
Non-adaptive	0.866378
Non-adaptive	0.896116
Non-adaptive	0.892978
Non-adaptive	0.954724
Non-adaptive	0.832956
Non-adaptive	0.80119
Non-adaptive	0.845462
Non-adaptive	0.771852
Non-adaptive	0.886816
Non-adaptive	0.797319
Non-adaptive	0.792778
Non-adaptive	0.791498
Non-adaptive	0.871659
Non-adaptive	0.829178
Non-adaptive	0.765763
Non-adaptive	0.810454
Non-adaptive	0.738542
Non-adaptive	0.77916
Non-adaptive	0.892756
Non-adaptive	0.890059
Non-adaptive	0.805344
Non-adaptive	0.852412
Non-adaptive	0.711498
Non-adaptive	0.844664
Non-adaptive	0.779794
Non-adaptive	0.779481
Non-adaptive	0.861685
Non-adaptive	0.78366
Non-adaptive	0.742257
Non-adaptive	0.829196
Non-adaptive	0.776775
Non-adaptive	0.870074
Non-adaptive	0.800593
Non-adaptive	0.806544
Non-adaptive	0.969444
Non-adaptive	0.795549
Non-adaptive	0.848206
Non-adaptive	0.810002
Non-adaptive	0.692614
Non-adaptive	0.843435
Non-adaptive	0.742165
Non-adaptive	0.731721
Non-adaptive	0.874015
Non-adaptive	0.792538
Non-adaptive	0.891312
Non-adaptive	0.828904
Non-adaptive	0.931517
Non-adaptive	0.848469
Non-adaptive	0.74297
Non-adaptive	0.861362
Non-adaptive	0.787372
Non-adaptive	0.762734
Non-adaptive	0.836918
Non-adaptive	0.806228
Non-adaptive	0.874515
Non-adaptive	0.742336
Non-adaptive	0.750457
Non-adaptive	0.809157
Non-adaptive	0.752259
Non-adaptive	0.804348
Non-adaptive	0.807044
Non-adaptive	0.746829
Non-adaptive	0.853229
Non-adaptive	0.756781
Non-adaptive	0.75622
Non-adaptive	0.758432
Non-adaptive	0.830148
Non-adaptive	0.814902
Non-adaptive	0.772341
Non-adaptive	0.875779
Non-adaptive	0.710135
Non-adaptive	0.73604
Non-adaptive	0.751848
Non-adaptive	0.759491
Non-adaptive	0.772193
Non-adaptive	0.831861
Non-adaptive	0.745715
Non-adaptive	0.85256
Non-adaptive	0.888617
Non-adaptive	0.838352
Non-adaptive	0.828485
Non-adaptive	0.91543
Non-adaptive	0.835572
Non-adaptive	0.835707
Non-adaptive	0.791228
Non-adaptive	0.883225
Non-adaptive	0.720004
Non-adaptive	0.828988
Non-adaptive	0.825457
Non-adaptive	0.665324
Non-adaptive	0.818881
Non-adaptive	0.822029
Non-adaptive	0.820245
Non-adaptive	0.778152
Non-adaptive	0.917394
Non-adaptive	0.841327
Non-adaptive	0.872192
Non-adaptive	0.783483
Non-adaptive	0.797923
Non-adaptive	0.916106
Non-adaptive	0.793236
Non-adaptive	0.870752
Non-adaptive	0.811471
Non-adaptive	0.878723
Non-adaptive	0.642826
Non-adaptive	0.782962
Non-adaptive	0.776943
Non-adaptive	0.775028
Non-adaptive	0.815024
Non-adaptive	0.854292
Non-adaptive	0.851459
Non-adaptive	0.784509
Non-adaptive	0.706762
Non-adaptive	0.791657
Non-adaptive	0.887376
Non-adaptive	0.824309
Non-adaptive	0.731283
Non-adaptive	0.901513
Non-adaptive	0.906983
Non-adaptive	0.906402
Non-adaptive	0.851086
Non-adaptive	0.868406
Non-adaptive	0.81429
Non-adaptive	0.886697
Non-adaptive	0.777477
Non-adaptive	0.814529
Non-adaptive	0.86648
Non-adaptive	0.749449
Non-adaptive	0.769651
Non-adaptive	0.839397
Non-adaptive	0.786891
Non-adaptive	0.91532
Non-adaptive	0.933781
Non-adaptive	0.788512
Non-adaptive	0.814672
Non-adaptive	0.80655
Non-adaptive	0.759841
Non-adaptive	0.785085
Non-adaptive	0.902606
Non-adaptive	0.739205
Non-adaptive	0.85334
Non-adaptive	0.69576
Non-adaptive	0.739813
Non-adaptive	0.721219
Non-adaptive	0.794946
Non-adaptive	0.820339
Non-adaptive	0.812375
Non-adaptive	0.741479
Non-adaptive	0.781538
Non-adaptive	0.844271
Non-adaptive	0.788439
Non-adaptive	0.740115
Non-adaptive	0.753422
Non-adaptive	0.816478
Non-adaptive	0.91158
Non-adaptive	0.809914
Non-adaptive	0.796019
Non-adaptive	0.844763
Non-adaptive	0.729777
Non-adaptive	0.778251
Non-adaptive	0.799036
Non-adaptive	0.897449
Non-adaptive	0.815142
Non-adaptive	0.848064
Non-adaptive	0.80543
Non-adaptive	0.895048
Non-adaptive	0.865282
Non-adaptive	0.728216
Non-adaptive	0.84813
Non-adaptive	0.804242
Non-adaptive	0.725983
Non-adaptive	0.853956
Non-adaptive	0.816215
Non-adaptive	0.813627
Non-adaptive	0.818903
Non-adaptive	0.748556
Non-adaptive	0.813638
Non-adaptive	0.81658
Non-adaptive	0.811818
Non-adaptive	0.867609
Non-adaptive	0.852412
Non-adaptive	0.793203
Non-adaptive	0.909174
Non-adaptive	0.854209
Non-adaptive	0.754889
Non-adaptive	0.772746
Non-adaptive	0.834394
Non-adaptive	0.866007
Non-adaptive	0.870256
Non-adaptive	0.792003
Non-adaptive	0.871609
Non-adaptive	0.729938
Non-adaptive	0.802941
Non-adaptive	0.813492
Non-adaptive	0.893561
Non-adaptive	0.770306
Non-adaptive	0.794674
Non-adaptive	0.803792
Non-adaptive	0.794762
Non-adaptive	0.896784
Non-adaptive	0.760667
Non-adaptive	0.866027
Non-adaptive	0.891447
Non-adaptive	0.92015
Non-adaptive	0.841652
Non-adaptive	0.847235
Non-adaptive	0.879771
Non-adaptive	0.864129
Non-adaptive	0.802614
Non-adaptive	0.788654
Non-adaptive	0.841659
Non-adaptive	0.808798
Non-adaptive	0.867746
Non-adaptive	0.695109
Non-adaptive	0.839009
Non-adaptive	0.844604
Non-adaptive	0.810397
Non-adaptive	0.74479
Non-adaptive	0.835642
Non-adaptive	0.794501
Non-adaptive	0.72537
Non-adaptive	0.901937
Non-adaptive	0.939275
Non-adaptive	0.727681
Non-adaptive	0.753477
Non-adaptive	0.715037
Non-adaptive	0.862554
Non-adaptive	0.822422
Non-adaptive	0.835648
Non-adaptive	0.778165
Non-adaptive	0.758668
Non-adaptive	0.867439
Non-adaptive	0.838595
Non-adaptive	0.779762
Non-adaptive	0.914187
Non-adaptive	0.922629
Non-adaptive	0.745021
Non-adaptive	0.870864
Non-adaptive	0.859425
Non-adaptive	0.831682
Non-adaptive	0.758013
Non-adaptive	0.943011
Non-adaptive	0.851729
Non-adaptive	0.778032
Non-adaptive	0.911479
Non-adaptive	0.83636
Non-adaptive	0.820227
Non-adaptive	0.810028
Non-adaptive	0.814749
Non-adaptive	0.891727
Non-adaptive	0.763563
Non-adaptive	0.834931
Non-adaptive	0.832143
Non-adaptive	0.879307
Non-adaptive	0.777427
Non-adaptive	0.783916
Non-adaptive	0.7149
Non-adaptive	0.787186
Non-adaptive	0.824772
Non-adaptive	0.775434
Non-adaptive	0.863371
Non-adaptive	0.80241
Non-adaptive	0.799244
Non-adaptive	0.873801
Non-adaptive	0.784265
Non-adaptive	0.722638
Non-adaptive	0.879414
Non-adaptive	0.842953
Non-adaptive	0.748919
Non-adaptive	0.766388
Non-adaptive	0.805849
Non-adaptive	0.802285
Non-adaptive	0.897576
Non-adaptive	0.77471
Non-adaptive	0.829299
Non-adaptive	0.778075
Non-adaptive	0.726504
Non-adaptive	0.876327
Non-adaptive	0.714046
Non-adaptive	0.888266
Non-adaptive	0.760695
Non-adaptive	0.789226
Non-adaptive	0.878056
Non-adaptive	0.804643
Non-adaptive	0.801094
Non-adaptive	0.876472
Non-adaptive	0.856323
Non-adaptive	0.831639
Non-adaptive	0.838727
Non-adaptive	0.649123
Non-adaptive	0.85525
Non-adaptive	0.827424
Non-adaptive	0.832189
Non-adaptive	0.844977
Non-adaptive	0.854433
Non-adaptive	0.864746
Non-adaptive	0.706244
Non-adaptive	0.777469
Non-adaptive	0.8364
Non-adaptive	0.830528
Non-adaptive	0.816665
Non-adaptive	0.758386
Non-adaptive	0.799306
Non-adaptive	0.804427
Non-adaptive	0.82853
Non-adaptive	0.768065
Non-adaptive	0.879648
Non-adaptive	0.791684
Non-adaptive	0.887664
Non-adaptive	0.818658
Non-adaptive	0.86299
Non-adaptive	0.788292
Non-adaptive	0.740446
Non-adaptive	0.916786
Non-adaptive	0.963559
Non-adaptive	0.77057
Non-adaptive	0.858671
Non-adaptive	0.855991
Non-adaptive	0.717621
Non-adaptive	0.847543
Non-adaptive	0.802259
Non-adaptive	0.846823
Non-adaptive	0.797718
Non-adaptive	0.890482
Non-adaptive	0.903482
Non-adaptive	0.771121
Non-adaptive	0.872612
Non-adaptive	0.749743
Non-adaptive	0.749122
Non-adaptive	0.657366
Non-adaptive	0.693161
Non-adaptive	0.768627
Non-adaptive	0.815984
Non-adaptive	0.856266
Non-adaptive	0.829412
Non-adaptive	0.779429
Non-adaptive	0.899278
Non-adaptive	0.841463
Non-adaptive	0.673485
Non-adaptive	0.845717
Non-adaptive	0.840105
Non-adaptive	0.873525
Non-adaptive	0.923783
Non-adaptive	0.728902
Non-adaptive	0.848533
Non-adaptive	0.782163
Non-adaptive	0.740717
Non-adaptive	0.790859
Non-adaptive	0.758368
Non-adaptive	0.837458
Non-adaptive	0.751389
Non-adaptive	0.910677
Non-adaptive	0.818202
Non-adaptive	0.818554
Non-adaptive	0.887679
Non-adaptive	0.869804
Non-adaptive	0.930661
Non-adaptive	0.711756
Non-adaptive	0.772293
Non-adaptive	0.845332
Non-adaptive	0.885677
Non-adaptive	0.815752
Non-adaptive	0.887086
Non-adaptive	0.828085
Non-adaptive	0.830299
Non-adaptive	0.756899
Non-adaptive	0.869862
Non-adaptive	0.828289
Non-adaptive	0.845934
Non-adaptive	0.835182
Non-adaptive	0.809426
Non-adaptive	0.877435
Non-adaptive	0.830756
Non-adaptive	0.723906
Non-adaptive	0.8599
Non-adaptive	0.898148
Non-adaptive	0.84592
Non-adaptive	0.821426
Non-adaptive	0.757451
Non-adaptive	0.814213
Non-adaptive	0.84255
Non-adaptive	0.693368
Non-adaptive	0.735552
Non-adaptive	0.780488
Non-adaptive	0.871681
Non-adaptive	0.786827
Non-adaptive	0.779153
Non-adaptive	0.884171
Non-adaptive	0.831918
Non-adaptive	0.852521
Non-adaptive	0.893029
Non-adaptive	0.804349
Non-adaptive	0.855246
Non-adaptive	0.719359
Non-adaptive	0.797306
Non-adaptive	0.849737
Non-adaptive	0.76833
Non-adaptive	0.824483
Non-adaptive	0.813725
Non-adaptive	0.871418
Non-adaptive	0.802811
Non-adaptive	0.869064
Non-adaptive	0.914168
Non-adaptive	0.849166
Non-adaptive	0.786269
Non-adaptive	0.821681
Non-adaptive	0.718012
Non-adaptive	0.87529
Non-adaptive	0.790694
Non-adaptive	0.687122
Non-adaptive	0.771487
Non-adaptive	0.785914
Non-adaptive	0.844468
Non-adaptive	0.83814
Non-adaptive	0.824796
Non-adaptive	0.789883
Non-adaptive	0.836458
Non-adaptive	0.844817
Non-adaptive	0.737024
Non-adaptive	0.75787
Non-adaptive	0.801311
Non-adaptive	0.916881
Non-adaptive	0.825207
Non-adaptive	0.816868
Non-adaptive	0.788686
Non-adaptive	0.770625
Non-adaptive	0.730748
Non-adaptive	0.684498
Non-adaptive	0.827644
Non-adaptive	0.84004
Non-adaptive	0.814882
Non-adaptive	0.729222
Non-adaptive	0.845656
Non-adaptive	0.708007
Non-adaptive	0.748564
Non-adaptive	0.755139
Non-adaptive	0.87122
Non-adaptive	0.745536
Non-adaptive	0.739805
Non-adaptive	0.77486
Non-adaptive	0.827493
Non-adaptive	0.793584
Non-adaptive	0.757703
Non-adaptive	0.700682
Non-adaptive	0.86726
Non-adaptive	0.796459
Non-adaptive	0.77121
Non-adaptive	0.798298
Non-adaptive	0.909259
Non-adaptive	0.782048
Non-adaptive	0.856771
Non-adaptive	0.850515
Non-adaptive	0.819562
Non-adaptive	0.822872
Non-adaptive	0.864107
Non-adaptive	0.855121
Non-adaptive	0.819282
Non-adaptive	0.743353
Non-adaptive	0.874537
Non-adaptive	0.753255
Non-adaptive	0.739181
Non-adaptive	0.804368
Non-adaptive	0.869737
Non-adaptive	0.85758
Non-adaptive	0.770153
Non-adaptive	0.852898
Non-adaptive	0.755362
Non-adaptive	0.691795
Non-adaptive	0.690898
Non-adaptive	0.898704
Non-adaptive	0.938983
Non-adaptive	0.755879
Non-adaptive	0.755629
Non-adaptive	0.853844
Non-adaptive	0.677902
Non-adaptive	0.676532
Non-adaptive	0.750033
Non-adaptive	0.852339
Non-adaptive	0.89487
Non-adaptive	0.823813
Non-adaptive	0.799877
Non-adaptive	0.817299
Non-adaptive	0.758351
Non-adaptive	0.806927
Non-adaptive	0.713311
Non-adaptive	0.757976
Non-adaptive	0.760046
Non-adaptive	0.856315
Non-adaptive	0.881011
Non-adaptive	0.682378
Non-adaptive	0.685135
Non-adaptive	0.889138
Non-adaptive	0.839727
Non-adaptive	0.884597
Non-adaptive	0.756621
Non-adaptive	0.77139
Non-adaptive	0.809867
Non-adaptive	0.841301
Non-adaptive	0.857248
Non-adaptive	0.773354
Non-adaptive	0.814569
Non-adaptive	0.837977
Non-adaptive	0.801009
Non-adaptive	0.884594
Non-adaptive	0.846295
Non-adaptive	0.79991
Non-adaptive	0.706452
Non-adaptive	0.823658
Non-adaptive	0.737475
Non-adaptive	0.903263
Non-adaptive	0.816727
Non-adaptive	0.845128
Non-adaptive	0.725202
Non-adaptive	0.755081
Non-adaptive	0.82375
Non-adaptive	0.779666
Non-adaptive	0.818217
Non-adaptive	0.769308
Non-adaptive	0.884128
Non-adaptive	0.815221
Non-adaptive	0.786203
Non-adaptive	0.847794
Non-adaptive	0.823678
Non-adaptive	0.796416
Non-adaptive	0.882246
Non-adaptive	0.823229
Non-adaptive	0.87521
Non-adaptive	0.869385
Non-adaptive	0.738448
Non-adaptive	0.771593
Non-adaptive	0.838431
Non-adaptive	0.791581
Non-adaptive	0.787302
Non-adaptive	0.886464
Non-adaptive	0.820275
Non-adaptive	0.780096
Non-adaptive	0.827352
Non-adaptive	0.83763
Non-adaptive	0.809161
Non-adaptive	0.790915
Non-adaptive	0.802348
Non-adaptive	0.860842
Non-adaptive	0.833571
Non-adaptive	0.827352
Non-adaptive	0.752267
Non-adaptive	0.767212
Non-adaptive	0.875878
Non-adaptive	0.782209
Non-adaptive	0.861649
Non-adaptive	0.817913
Non-adaptive	0.882959
Non-adaptive	0.742392
Non-adaptive	0.864325
Non-adaptive	0.716155
Non-adaptive	0.831504
Non-adaptive	0.86514
Non-adaptive	0.867908
Non-adaptive	0.817991
Non-adaptive	0.779153
Non-adaptive	0.755777
Non-adaptive	0.82279
Non-adaptive	0.766352
Non-adaptive	0.708453
Non-adaptive	0.802364
Non-adaptive	0.908208
Non-adaptive	0.724953
Non-adaptive	0.792145
Non-adaptive	0.782848
Non-adaptive	0.838939
Non-adaptive	0.843776
Non-adaptive	0.846117
Non-adaptive	0.745983
Non-adaptive	0.770607
Non-adaptive	0.893408
Non-adaptive	0.80883
Non-adaptive	0.805406
Non-adaptive	0.794493
Non-adaptive	0.884664
Non-adaptive	0.898401
Non-adaptive	0.831583
Non-adaptive	0.707184
Non-adaptive	0.870257
Non-adaptive	0.87727
Non-adaptive	0.822975
Non-adaptive	0.83705
Non-adaptive	0.836718
Non-adaptive	0.782878
Non-adaptive	0.911728
Non-adaptive	0.719376
Non-adaptive	0.815702
Non-adaptive	0.706096
Non-adaptive	0.943401
Non-adaptive	0.722367
Non-adaptive	0.698501
Non-adaptive	0.791353
Non-adaptive	0.770099
Non-adaptive	0.789853
Non-adaptive	0.866575
Non-adaptive	0.821741
Non-adaptive	0.841511
Non-adaptive	0.816735
Non-adaptive	0.81842
Non-adaptive	0.715224
Non-adaptive	0.761061
Non-adaptive	0.868042
Non-adaptive	0.798594
Non-adaptive	0.857937
Non-adaptive	0.796658
Non-adaptive	0.843934
Non-adaptive	0.795285
Non-adaptive	0.763111
Non-adaptive	0.767063
Non-adaptive	0.799691
Non-adaptive	0.808584
Non-adaptive	0.851484
Non-adaptive	0.878916
Non-adaptive	0.69853
Non-adaptive	0.81093
Non-adaptive	0.835221
Non-adaptive	0.703893
Non-adaptive	0.747961
Non-adaptive	0.839578
Non-adaptive	0.762769
Non-adaptive	0.69476
Non-adaptive	0.883826
Non-adaptive	0.86448
Non-adaptive	0.839998
Non-adaptive	0.86539
Non-adaptive	0.883463
Non-adaptive	0.75802
Non-adaptive	0.787056
Non-adaptive	0.905279
Non-adaptive	0.843307
Non-adaptive	0.801225
Non-adaptive	0.692289
Non-adaptive	0.74542
Non-adaptive	0.784477
Non-adaptive	0.746544
Non-adaptive	0.89393
Non-adaptive	0.841015
Non-adaptive	0.782595
Non-adaptive	0.764818
Non-adaptive	0.861711
Non-adaptive	0.756454
Non-adaptive	0.915581
Non-adaptive	0.777189
Non-adaptive	0.699163
Non-adaptive	0.891927
Non-adaptive	0.842979
Non-adaptive	0.882099
Non-adaptive	0.811421
Non-adaptive	0.735343
Non-adaptive	0.746068
Non-adaptive	0.76415
Non-adaptive	0.817305
Non-adaptive	0.75357
Non-adaptive	0.777787
Non-adaptive	0.723965
Non-adaptive	0.845081
Non-adaptive	0.821145
Non-adaptive	0.866655
Non-adaptive	0.739837
Non-adaptive	0.929949
Non-adaptive	0.880585
Non-adaptive	0.809814
Non-adaptive	0.767765
Non-adaptive	0.82354
Non-adaptive	0.756113
Non-adaptive	0.878396
Non-adaptive	0.826223
Non-adaptive	0.885999
Non-adaptive	0.815914
Non-adaptive	0.869577
Non-adaptive	0.788919
Non-adaptive	0.799419
Non-adaptive	0.920162
Non-adaptive	0.750484
Non-adaptive	0.844237
Non-adaptive	0.75346
Non-adaptive	0.768926
Non-adaptive	0.81175
Non-adaptive	0.88039
Non-adaptive	0.769301
Non-adaptive	0.932529
Non-adaptive	0.821285
Non-adaptive	0.917189
Non-adaptive	0.801984
Non-adaptive	0.899015
Non-adaptive	0.84435
Non-adaptive	0.806938
Non-adaptive	0.803139
Non-adaptive	0.728618
Non-adaptive	0.88804
Non-adaptive	0.725016
Non-adaptive	0.913889
Non-adaptive	0.791447
Non-adaptive	0.872872
Non-adaptive	0.700655
Non-adaptive	0.828307
Non-adaptive	0.750131
Non-adaptive	0.856481
Non-adaptive	0.727995
Non-adaptive	0.772903
Non-adaptive	0.847112
Non-adaptive	0.804383
Non-adaptive	0.869749
Non-adaptive	0.773743
Non-adaptive	0.768196
Non-adaptive	0.75656
Non-adaptive	0.678407
Non-adaptive	0.785796
Non-adaptive	0.867519
Non-adaptive	0.816961
Non-adaptive	0.811536
Non-adaptive	0.806117
Non-adaptive	0.919889
Non-adaptive	0.848986
Non-adaptive	0.839981
Non-adaptive	0.847722
Non-adaptive	0.777535
Non-adaptive	0.717027
Non-adaptive	0.885888
Non-adaptive	0.761185
Non-adaptive	0.762263
Non-adaptive	0.822704
Non-adaptive	0.782541
Non-adaptive	0.881137
Non-adaptive	0.876284
Non-adaptive	0.759576
Non-adaptive	0.736261
Non-adaptive	0.770506
Non-adaptive	0.736541
Non-adaptive	0.814305
Non-adaptive	0.836251
Non-adaptive	0.866979
Non-adaptive	0.866414
Non-adaptive	0.874937
Non-adaptive	0.909963
Non-adaptive	0.80038
Non-adaptive	0.743122
Non-adaptive	0.760325
Non-adaptive	0.816986
Non-adaptive	0.771156
Non-adaptive	0.899363
Non-adaptive	0.857082
Non-adaptive	0.745468
Non-adaptive	0.843393
Non-adaptive	0.813106
Non-adaptive	0.855968
Non-adaptive	0.873064
Non-adaptive	0.846107
Non-adaptive	0.829221
Non-adaptive	0.73083
Non-adaptive	0.869487
Non-adaptive	0.829793
Non-adaptive	0.908067
Non-adaptive	0.714801
Non-adaptive	0.890033
Non-adaptive	0.844499
Non-adaptive	0.808956
Non-adaptive	0.750412
Non-adaptive	0.88493
Non-adaptive	0.846428
Non-adaptive	0.794856
Non-adaptive	0.854034
Non-adaptive	0.797208
Non-adaptive	0.765096
Non-adaptive	0.808249
Non-adaptive	0.770901
Non-adaptive	0.812658
Non-adaptive	0.815436
Non-adaptive	0.750714
Non-adaptive	0.830425
Non-adaptive	0.742338
Non-adaptive	0.926859
Non-adaptive	0.763631
Non-adaptive	0.808712
Non-adaptive	0.712939
Non-adaptive	0.8072
Non-adaptive	0.832283
Non-adaptive	0.890394
Non-adaptive	0.836267
Non-adaptive	0.838049
Non-adaptive	0.763018
Non-adaptive	0.793326
Non-adaptive	0.810617
Non-adaptive	0.787738
Non-adaptive	0.768681
Non-adaptive	0.846077
Non-adaptive	0.883742
Non-adaptive	0.861465
Non-adaptive	0.600811
Non-adaptive	0.885006
Non-adaptive	0.856534
Non-adaptive	0.864421
Non-adaptive	0.710347
Non-adaptive	0.732561
Non-adaptive	0.763158
Non-adaptive	0.866457
Non-adaptive	0.739393
Non-adaptive	0.750026
Non-adaptive	0.911043
Non-adaptive	0.802303
Non-adaptive	0.837041
Non-adaptive	0.835685
Non-adaptive	0.660948
Non-adaptive	0.72332
Non-adaptive	0.769697
Non-adaptive	0.759404
Non-adaptive	0.730674
Non-adaptive	0.764871
Non-adaptive	0.845485
Non-adaptive	0.769211
Non-adaptive	0.815356
Non-adaptive	0.780161
Non-adaptive	0.836781
Non-adaptive	0.884796
Non-adaptive	0.869389
Non-adaptive	0.903287
Non-adaptive	0.780467
Non-adaptive	0.758066
Non-adaptive	0.765542
Non-adaptive	0.799161
Non-adaptive	0.825038
Non-adaptive	0.863801
Non-adaptive	0.840432
Non-adaptive	0.88309
Non-adaptive	0.836149
Non-adaptive	0.772325
Non-adaptive	0.848195
Non-adaptive	0.817808
Non-adaptive	0.85731
Non-adaptive	0.84335
Non-adaptive	0.840341
Non-adaptive	0.789768
Non-adaptive	0.841521
Non-adaptive	0.766236
Non-adaptive	0.92243
Non-adaptive	0.819723
Non-adaptive	0.76719
Non-adaptive	0.820997
Non-adaptive	0.891631
Non-adaptive	0.813908
Non-adaptive	0.809074
Non-adaptive	0.894781
Non-adaptive	0.840688
Non-adaptive	0.781572
Non-adaptive	0.846065
Non-adaptive	0.931688
Non-adaptive	0.818578
Non-adaptive	0.817714
Non-adaptive	0.883024
Non-adaptive	0.82737
Non-adaptive	0.862601
Non-adaptive	0.779441
Non-adaptive	0.783152
Non-adaptive	0.821873
Non-adaptive	0.837076
Non-adaptive	0.824594
Non-adaptive	0.832006
Non-adaptive	0.84764
Non-adaptive	0.737226
Non-adaptive	0.852749
Non-adaptive	0.816757
Non-adaptive	0.83837
Non-adaptive	0.812761
Non-adaptive	0.921422
Non-adaptive	0.815372
Non-adaptive	0.793421
Non-adaptive	0.681384
Non-adaptive	0.889186
Non-adaptive	0.852218
Non-adaptive	0.896914
Non-adaptive	0.768907
Non-adaptive	0.851872
Non-adaptive	0.881219
Non-adaptive	0.7501
Non-adaptive	0.798934
Non-adaptive	0.838516
Non-adaptive	0.848843
Non-adaptive	0.830923
Non-adaptive	0.760068
Non-adaptive	0.760454
Non-adaptive	0.722998
Non-adaptive	0.830194
Non-adaptive	0.889787
Non-adaptive	0.717389
Non-adaptive	0.875067
Non-adaptive	0.872797
Non-adaptive	0.870213
Non-adaptive	0.77085
Non-adaptive	0.77326
Non-adaptive	0.897124
Non-adaptive	0.810677
Non-adaptive	0.692073
Non-adaptive	0.820115
Non-adaptive	0.913117
Non-adaptive	0.822842
Non-adaptive	0.817812
Non-adaptive	0.745488
Non-adaptive	0.693147
Non-adaptive	0.778386
Non-adaptive	0.821296
Non-adaptive	0.864051
Non-adaptive	0.805495
Non-adaptive	0.884985
Non-adaptive	0.815723
Non-adaptive	0.720563
Non-adaptive	0.854644
Non-adaptive	0.901243
Non-adaptive	0.820516
Non-adaptive	0.859266
Non-adaptive	0.873173
Non-adaptive	0.873078
Non-adaptive	0.815196
Non-adaptive	0.73366
Non-adaptive	0.684563
Non-adaptive	0.831107
Non-adaptive	0.925984
Non-adaptive	0.792173
Non-adaptive	0.761721
Non-adaptive	0.777532
Non-adaptive	0.861099
Non-adaptive	0.923498
Non-adaptive	0.848816
Non-adaptive	0.845726
Non-adaptive	0.828753
Non-adaptive	0.901744
Non-adaptive	0.798487
Non-adaptive	0.80008
Non-adaptive	0.803227
Non-adaptive	0.794435
Non-adaptive	0.801097
Non-adaptive	0.760857
Non-adaptive	0.80558
Non-adaptive	0.854691
Non-adaptive	0.812635
Non-adaptive	0.711498
Non-adaptive	0.76201
Non-adaptive	0.847538
Non-adaptive	0.678201
Non-adaptive	0.808734
Non-adaptive	0.866787
Non-adaptive	0.789768
Non-adaptive	0.824896
Non-adaptive	0.716865
Non-adaptive	0.862963
Non-adaptive	0.759347
Non-adaptive	0.769798
Non-adaptive	0.721617
Non-adaptive	0.842746
Non-adaptive	0.879808
Non-adaptive	0.821384
Non-adaptive	0.88931
Non-adaptive	0.866347
Non-adaptive	0.854446
Non-adaptive	0.795833
Non-adaptive	0.792357
Non-adaptive	0.8196
Non-adaptive	0.707353
Non-adaptive	0.770898
Non-adaptive	0.854426
Non-adaptive	0.894707
Non-adaptive	0.788256
Non-adaptive	0.872145
Non-adaptive	0.776254
[truncated: 8,002 more rows]
