# Supplementary material for: Domestication and lowland adaptation of coastal preceramic maize from Paredones, Peru
Source: eLife. 2023 Apr 18;12:e83149. doi: 10.7554/eLife.83149 (PMC10112886; doi:10.7554/eLife.83149)
Supplement: Supplementary file 1. [file elife-83149-supp1.xlsx]

## Sheet: Supplementary File 1
Sample	Line	ID	Race	Species	Class	Country	Accession (source) of origin	Selfing generation
1	TIL01	TIP-281	Balsas	Z. mays ssp. parviglumis	TIL	Mexico	JSG Y LOS-130 (INIFAP)	S5
2	TIL02	TIP-301	Balsas	Z. mays ssp. parviglumis	TIL	Mexico	JSG Y LOS-119 (INIFAP)	S2
3	TIL03	TIP-282	Jalisco	Z. mays ssp. parviglumis	TIL	Mexico	JSG Y MAS-401 (INIFAP)	S5
4	TIL04	TIP-285	Balsas	Z. mays ssp. parviglumis	TIL	Mexico	8783 (CIMMYT)	S5
5	TIL04	TIP-454	Balsas	Z. mays ssp. parviglumis	TIL	Mexico	8783 (CIMMYT)	S5
6	TIL05	TIP-287	Balsas	Z. mays ssp. parviglumis	TIL	Mexico	JSG-197 (INIFAP)	S5
7	TIL06	TIP-260	Balsas	Z. mays ssp. parviglumis	TIL	Mexico	JSG Y LOS-109 (INIFAP)	S3
8	TIL06	TIP-496	Balsas	Z. mays ssp. parviglumis	TIL	Mexico	JSG Y LOS-109 (INIFAP)	S6
9	TIL07	TIP-305	Balsas	Z. mays ssp. parviglumis	TIL	Mexico	JSG-378 (INIFAP)	S4
10	TIL08	TIP-293	Balsas	Z. mays ssp. mexicana	TIL	Mexico	JSG-374 (INIFAP)	S5
11	TIL09	TIP-265	Balsas	Z. mays ssp. parviglumis	TIL	Mexico	JSG Y LOS-161 (INIFAP)	S4
12	TIL10	TIP-304	Balsas	Z. mays ssp. parviglumis	TIL	Mexico	11355 (CIMMYT)	S4
13	TIL11	TIP-296	Jalisco	Z. mays ssp. parviglumis	TIL	Mexico	JSG Y MAS-264 (INIFAP)	S6
14	TIL12	TIP-267	Balsas	Z. mays ssp. parviglumis	TIL	Mexico	PI566686 (NCRPIS)	S4
15	TIL14	TIP-498	Jalisco	Z. mays ssp. parviglumis	TIL	Mexico	967 (BFB)	S6
16	TIL15	TIP-276	Balsas	Z. mays ssp. parviglumis	TIL	Mexico	K Site 4 (TAK)	S4
17	TIL16	TIP-309	Balsas	Z. mays ssp. parviglumis	TIL	Mexico	BK Site 4 (GWB)	S4
18	TIL17	TIP-272	Balsas	Z. mays ssp. parviglumis	TIL	Mexico	W Site 6 (HGW)	S4
19	TIL25	TIP-489	Central Plateau	Z. mays ssp. mexicana	TIL	Mexico	11066 (LMP)	S5
20	VEN 568 (NRC)	BKN023	Araguito	Z. mays ssp. mays	LRI	Venezuela	VEN 568 (NRC)	S4
21	PI213793 (NCRPIS)	BKN014	Assiniboine	Z. mays ssp. mays	LRI	USA	PI213793 (NCRPIS)	S6
22	OAX 68 (INIFAP)	BKN029	Bolita	Z. mays ssp. mays	LRI	Mexico	OAX 68 (INIFAP)	S5
23	BOV 635 (NRC)	BKN019	Cateto	Z. mays ssp. mays	LRI	Bolivia	BOV 635 (NRC)	S5
24	SIN 2 (INIFAP)	BKN033	Chapalote	Z. mays ssp. mays	LRI	Mexico	SIN 2 (INIFAP)	S5
25	CHS 86 (INIFAP)	BKN031	Comiteco	Z. mays ssp. mays	LRI	Mexico	CHS 86 (INIFAP)	S5
26	VEN 453 (ICA)	BKN034	Costeno	Z. mays ssp. mays	LRI	Venezuela	VEN 453 (ICA)	S5
27	RGS VII (CIMMYT)	BKN032	Cravo Riogranense	Z. mays ssp. mays	LRI	Brazil	RGS VII (CIMMYT)	S5
28	CHI 349 (NCGRP)	BKN027	Cristalino Norteno	Z. mays ssp. mays	LRI	Chile	CHI 349 (NCGRP)	S5
29	CUB 65 (CIMMYT)	BKN020	Cuban Flint	Z. mays ssp. mays	LRI	Cuba	CUB 65 (CIMMYT)	S5
30	PI317675 (NCRPIS)	BKN015	Havasupai	Z. mays ssp. mays	LRI	SW USA	PI317675 (NCRPIS)	S6
31	PI311237 (NCRPIS)	BKN040	Hickory King	Z. mays ssp. mays	LRI	USA	PI311237 (NCRPIS)	S7
32	PI217408 (NCRPIS)	BKN016	Longfellow Flint	Z. mays ssp. mays	LRI	USA	PI217408 (NCRPIS)	S5
33	BOV 344 (ICA)	BKN026	Pisankalla	Z. mays ssp. mays	LRI	Bolivia	BOV 344 (ICA)	S5
34	NAY 15 (INIFAP)	BKN022	Reventador	Z. mays ssp. mays	LRI	Mexico	NAY 15 (INIFAP)	S5
35	PI218130 (NCRPIS)	BKN017	Santa Domingo	Z. mays ssp. mays	LRI	SW USA	PI218130 (NCRPIS)	S6
36	PI269743 (NCRPIS)	BKN018	Shoe Peg	Z. mays ssp. mays	LRI	USA	PI269743 (NCRPIS)	S6
37	JAL 43 (CIMMYT)	BKN035	Tabloncillo	Z. mays ssp. mays	LRI	Mexico	JAL 43 (CIMMYT)	S5
38	TAM 125 (INIFAP)	BKN025	Tuxpeno	Z. mays ssp. mays	LRI	Mexico	TAM 125 (INIFAP)	S5
39	OAX 70 (CIMMYT)	BKN030	Zapalote Chico	Z. mays ssp. mays	LRI	Mexico	OAX 70 (CIMMYT)	S5
40	AYA 32 (PCIM)	BKN009	Chullpi	Z. mays ssp. mays	LRI	Peru	AYA 32 (PCIM)	S4
41	BOV 587 (NRC)	BKN010	Poropo	Z. mays ssp. mays	LRI	Bolivia	BOV 587 (NRC)	S4
42	B73	B73	B73	Z. mays ssp. mays	SS	-	B73	-
43	TDD39103	TDD39103	TDD39103	Tripsacum dactyloides	TRIP	-	TDD39103	-
44	PT2233	PT2233	Palomero Toluqueno	Z. mays ssp. mays	LRI	Mexico	SAMN02981271	-
