# Supplementary material for: Domestication and lowland adaptation of coastal preceramic maize from Paredones, Peru
Source: eLife. 2023 Apr 18;12:e83149. doi: 10.7554/eLife.83149 (PMC10112886; doi:10.7554/eLife.83149)
Supplement: Supplementary file 2. [file elife-83149-supp2.xlsx]

## Sheet: Supplementary File 2
	South American adaptive SNPs					Mesoamerican adaptive SNPs
	Chromosome	Position	Distance			Chromosome	Position	Distance
1	1	128373	233133885		1	1	22382496
1	1	233262258			1	1	44544857	22162361
1	2	196736161	7686044		1	1	149125711	104580854
1	2	204422205			1	1	174024276	35842313
					1	1	209866589	26429576
1	3	135316387	86335593		1	1	236296165
1	3	48980794	74818507		1	2	64929044	10009062
1	3	210134894	3		1	2	74938106	35634302
1	3	210134897			1	2	110572408	90507405
					1	2	201079813	33188674
1	5	210219024			1	2	234268487
1	5	210219023	1		1	3	154634811	36565532
					1	3	191200343	33
					1	3	191200376
1	7	158087268	39		1	4	169577208	791459
1	7	158087229			1	4	170368667	6721693
					1	4	177090360	1327224
1	9	60412695			1	4	178417584	2111467
					1	4	180529051	40
					1	4	180529091
					1	5	30486864	46481798
1	10	1283371	8917642		1	5	76968662
1	10	10201013			1	7	114903332
					1	8	2517850	17167386
					1	8	19685236	48124947
1	4	222017566	6		1	8	67810183	43515263
1	4	222017560			1	8	111325446	33684505
1	4	181262048	40755512		1	8	145009951	16066610
1	4	222017569	3		1	8	161076561
1	4	116493754	64768294		1	9	137157650
					1	10	8455981	1441350
20		MEDIAN =	8301843		1	10	9897331
					32		MEDIAN =	2.4296e+07
