# Supplementary material for: Domestication and lowland adaptation of coastal preceramic maize from Paredones, Peru
Source: eLife. 2023 Apr 18;12:e83149. doi: 10.7554/eLife.83149 (PMC10112886; doi:10.7554/eLife.83149)
Supplement: Supplementary file 3. — (B) Allele frequency of highland and lowland South American landraces at sites intersected with Par_N16 from 390 adaptive SNPs. [file elife-83149-supp3.xlsx]

## Sheet: Supplementary File 3A
Chromosome	Position	Par_N16 genotype	Allele frequency highlands	Allele frequency lowlands
4	178417584	TT	0.382353	1
4	170368667	CC	0.5	1
8	145009951	TT	1	0.318182
1	149125711	TT	0.791667	0.1
8	67810183	TT	0.791667	0.590909
8	19685236	GG	0.5	0.9
4	180529091	AA	0.333333	1
3	154634811	AA	0.333333	0.861111
5	76968662	CC	0.15	0.884615
8	161076561	CC	0.214286	0.85
2	234268487	GG	0.473684	0.973684
8	2517850	GG	0.958333	0.444444
4	180529051	AA	0.333333	1
10	8455981	CC	0.28125	0.921053
3	191200343	TT	0.416667	0.921053
7	114903332	CC	0.958333	0.384615
2	74938106	CC	0.105263	0.714286
4	169577208	GG	0.208333	0.884615
4	177090360	GG	0.5	1
8	111325446	CC	0.1875	0.666667
2	110572408	AA	0.1875	0.558824
1	209866589	AA	0.131579	0.805556
1	236296165	TT	0.666667	1
1	22382496	GG	0.966667	0.5
9	137157650	CC	0.333333	0.933333
1	174024276	CC	0.571429	1
1	44544857	AA	0.714286	0.136364
2	201079813	GG	0.714286	0.136364
10	9897331	AA	1	0.636364
3	191200376	TT	0.416667	0.636364
2	64929044	GG	0.558824	1
5	30486864	AA	0.558824	0.5

## Sheet: Supplementary File 3B
Chromosome	Position	Par_N16 genotype	Allele frequency highlands	Allele frequency lowlands
1	128373	CC	0.178571	0.9
10	1283371	GG	0.1	1
4	222017566	GG	0.275	0.95
3	135316387	GG	1	0.166667
10	10201013	AA	0.833333	0.166667
4	222017560	AA	0.275	0.95
7	158087268	CC	0.3	1
5	210219024	AA	0.235294	0.928571
2	196736161	CC	0.235294	0.708333
5	210219023	AA	0.235294	0.928571
4	181262048	GG	0.235294	0.9
4	222017569	TT	0.275	0.95
3	48980794	GG	0.791667	0.0714286
3	210134894	CC	0.794118	0.0882353
1	233262258	TT	0.666667	0.0882353
7	158087229	TT	0.6	0.0882353
4	116493754	CC	0.3	0.875
9	60412695	AA	1	0.533333
2	204422205	GG	0.2	0.947368
3	210134897	TT	0.794118	0.0882353
